# Supplementary material for: Comprehensive computational analysis via Adverse Outcome Pathways and Aggregate Exposure Pathways in exploring synergistic effects from radon and tobacco smoke on lung cancer
Source: Front Public Health. 2025 Jul 31;13:1571290. doi: 10.3389/fpubh.2025.1571290 (PMC12350471; doi:10.3389/fpubh.2025.1571290)
Supplement: Supplementary file 3 [file Table_2.xlsx]

## Sheet: Clustering
AOP-helpFinder							PubTator				Clustering (kmeans+tsne)
PMID	stressor	event	type	title	date	abstract	human	miner	animals	cells	cluster
9465246	[Radon] AND [Cigarette/Tobacco]	Lung cancer	AO	The radon risk in Lombardy.	1997	We investigated the geographical distribution of lung cancer mortality rates in some Italian regions, Lombardy and Emilia-Romagna in particular, where the investigation was mainly focused on the risk related to the presence of radon inside dwelling-houses. We referred to the death certificates provided by the Central Institute of Statistics ISTAT relative to the years 1980-1988 to calculate the r…	x	x	x	x	1
8964091	[Radon] AND [Cigarette/Tobacco]	Lung cancer	AO	Molecular epidemiology and prevention of bronchopulmonary carcinoma.	1995	Lung cancer represents by far the most important cause of death within neoplastic diseases in developed western countries. Mortality profiles are closely related to tobacco consumption, which is the dominant cause of this disease 85-90 of cases. After several decades of steep escalation, during the past years the mortality curve tended to decline in the Italian population as well as in other popu…	x	x	x	x	1
8605854	[Radon] AND [Cigarette/Tobacco]	Lung cancer	AO	Potential for bias in epidemiologic studies that rely on glass-based retrospective assessment of radon.	1995	Retrospective assessment of exposure to radon remains the greatest challenge in epidemiologic efforts to assess lung cancer risk associated with residential exposure. An innovative technique based on measurement of alpha-emitting, long-lived daughters embedded by recoil into household glass may one day provide improved radon dosimetry. Particulate air pollution is known, however, to retard the pl…	x	x	x	x	1
8488359	[Radon] AND [Cigarette/Tobacco]	Lung cancer	AO	Recent developments in the epidemiology of lung cancer.	1993	Lung cancer is currently the leading cause of cancer death in the United States and also the most common tumor worldwide. Changes in the distribution of histologic types over the past two decades in the United States, as well as high rates of lung cancer in certain subpopulations, require explanation. While cigarette smoking and specific occupational exposures are firmly established as important …	x	x	x	x	1
8116607	[Radon] AND [Cigarette/Tobacco]	Lung cancer	AO	Assessment of ecologic regression in the study of lung cancer and indoor radon.	1994	Ecologic regression studies conducted to assess the cancer risk of indoor radon to the general population are subject to methodological limitations, and they have given seemingly contradictory results. The authors use simulations to examine the effects of two major methodological problems that affect these studies measurement error and misspecification of the risk model. In a simulation study of …	x	x	x	x	1
8059766	[Radon] AND [Cigarette/Tobacco]	Lung cancer	AO	Case-control study of residential radon and lung cancer in Winnipeg, Manitoba, Canada.	1994	A case-control study of lung cancer in relation to exposure to radon in homes in Winnipeg, Manitoba, Canada, was conducted during 1983-1990. In total, 738 individuals with histologically confirmed incident cases of lung cancer were interviewed, along with 738 controls matched on age /- 5 years and sex. Radon dosimeters were placed in all residences in which the study subjects had reported living …	x	x	x	x	1
7847760	[Radon] AND [Cigarette/Tobacco]	Lung cancer; Pulmonary Fibrosis	AO	Silica and lung cancer a continuing controversy.	1994	The question whether silica is carcinogenic is not new, but there has been a resurgence of research over the last two decades with the use of more powerful epidemiological methodologies. There is sufficient evidence for the carcinogenicity of crystalline silica in animals. A large number of cohort and case-control studies consistently suggest a modest excess of lung cancer in workers with occupat…	x	x	x	x	1
7628427	[Radon] AND [Cigarette/Tobacco]	Lung cancer	AO	Design issues in studies of radon and lung cancer implications of the joint effect of smoking and radon.	1995	Many case-control studies have been undertaken to assess whether and to what extent residential radon exposure is a risk factor for lung cancer. Nearly all these studies have been conducted in populations including smokers and nonsmokers. In this paper, we show that, depending on the nature of the joint effect of radon and tobacco on lung cancer risk, it may be very difficult to detect a main eff…	x	x	x	x	1
628297	[Radon] AND [Cigarette/Tobacco]	Lung cancer	AO	Epidemiology of head and neck cancer.	1978	The epidemiology of head and neck cancer can be accounted for largely in terms of known carcinogens introduced into the body through the mouth. Though there are many environmental exposures--such as asbestos, radon, nickel and arsenic--which have strong carcinogenic effects, most of these have only a small impact on the general population because exposure is limited, usually to small occupational…	x	x	x	x	1
36730122	[Radon] AND [Cigarette/Tobacco]	Asthma	AO	Air pollution and childhood asthma.	2023	PURPOSE OF REVIEW Asthma is the most common chronic disease of childhood. Environmental exposures, such as allergens and pollutants, are ubiquitous factors associated with asthma development and asthma morbidity. In this review, we highlight the most recent studies relevant to childhood asthma risk, onset, and exacerbation related to air pollution exposure. RECENT FINDINGS In this article, we rev…	x	x	x	x	1
36474178	[Radon] AND [Cigarette/Tobacco]	Lung cancer	AO	Construction and case study of a novel lung cancer risk index.	2022	PURPOSE This study constructs a lung cancer risk index LCRI that incorporates many modifiable risk factors using an easily reproducible and adaptable method that relies on publicly available data. METHODS We used meta-analysis followed by Analytic Hierarchy Process AHP to generate a lung cancer risk index LCRI that incorporates seven modifiable risk factors active smoking, indoor air pollution, o…	x	x	x	x	1
36165824	[Radon] AND [Cigarette/Tobacco]	Lung cancer	AO	Average uranium bedrock concentration in Swedish municipalities predicts male lung cancer incidence rate when adjusted for smoking prevalence Indication of a cumulative radon induced detriment.	2023	Bedrock U has been used as a proxy for local indoor radon exposure. A preliminary assessment of cancer incidence rate in a cohort of 809,939 adult males living in 9 different Swedish counties in 1986 has been used to correlate the cumulative lung cancer and total cancer excluding lung incidence rates between 1986 and 2020, respectively with the municipality average value of bedrock U concentratio…	x	x	x	x	1
35912519	[Radon] AND [Cigarette/Tobacco]	Lung cancer	AO	Interaction between occupational radon exposure and tobacco smoke a systematic review.	2022	INTRODUCTION The risk of lung cancer from radon exposure was small compared to tobacco smoking BEIR VI, but the relationship between these two carcinogenic agents has yet to be quantitatively estimated. The objective of this systematic review was to evaluate the last evidences on the role of radon occupational exposures and tobacco smoke on lung cancer risk. AREAS COVERED Thirteen articles were s…	x	x	x	x	1
35780671	[Radon] AND [Cigarette/Tobacco]	Lung cancer	AO	Using geogenic radon potential to assess radon priority area designation, a case study around Castleisland, Co. Kerry, Ireland.	2022	Globally, indoor radon exposure is the leading cause of lung cancer in non-smokers and second most common cause after tobacco smoking. Soil-gas radon is the main contributor to indoor radon, but its spatial distribution is highly variable, which poses certain challenges for mapping and predicting radon anomalies. Measurement of indoor radon typically takes place over long periods of time e.g. 3 m…	x	x	x	x	1
3570624	[Radon] AND [Cigarette/Tobacco]	Lung cancer	AO	A case-control study of lung cancer relative to domestic radon exposure.	1987	Public concern was expressed regarding the possibility of adverse health effects with the disposal of radioactive waste in Port Hope, Ontario. A case-control study was carried out to estimate the relative importance of domestic radon gas exposure in the causation of lung cancer in the town over a ten-year period. Twenty-seven cases met the entry criteria. Statistical analyses of results did not p…	x	x	x	x	1
3512802	[Radon] AND [Cigarette/Tobacco]	Lung cancer	AO	Interaction between tobacco smoking and occupational exposures in the causation of lung cancer.	1986	The nature of the interaction between smoking and occupational exposure is controversial, in part because of lack of agreement on the definition of interaction and in part because of the scarcity of adequate epidemiologic data. Occupational investigators have assessed interaction primarily as a departure from an additive rather than from a multiplicative model of relative risks or rate ratios. To…	x	x	x	x	1
33739684	[Radon] AND [Cigarette/Tobacco]	Lung cancer; Increase, lung cancer	AO	Risk factors and prevention of lung cancer.	2020	Risk factors and prevention of lung cancer. In France, lung cancer is the leading cause of death from cancer with more than 30,000 deaths per year. The vast majority 85 of lung cancer are due to tobacco and the duration of smoking has a greater impact than the amount smoked. Passive smoking increases the risk of lung cancer and is responsible for around 25 of lung cancers in non-smokers in France…	x	x	x	x	1
33082391	[Radon] AND [Cigarette/Tobacco]	Lung cancer	AO	Identifying indoor radon sources in Pa Miang, Chiang Mai, Thailand.	2020	Radon is the leading source of lung cancer mortality after smoking in Chiang Mai, Thailand. Finding a source of carcinogens is one of the important measures for preventing the cancer risk for this region. Specific sites at Pa Miang, Doi Saket have the highest incidences of lung cancer and have a combination of factors that influence indoor radon concentration. Our study identified the sources of …	x	x	x	x	1
32892905	[Radon] AND [Cigarette/Tobacco]	Lung cancer	AO	Cost-effectiveness of radon remediation programmes in the UK in the 2020s.	2020	Radon, a gaseous radioactive decay product of naturally-occurring uranium is widely distributed in the environment in rocks and soils and, in certain circumstances, can accumulate in the built environment. Initial studies confirmed a direct link between exposure to both radon gas and its short-lived radioactive progeny, and increased lung-cancer incidence, and demonstrated that radon levels in do…	x	x	x	x	1
31985340	[Radon] AND [Cigarette/Tobacco]	Lung cancer	AO	Longitudinal relationships between lung cancer mortality rates, smoking, and ambient air quality a comprehensive review and analysis.	2019	Lung cancer mortality LCM has been associated with smoking and air pollution. This article draws on smoking relationships to clarify air pollution relationships. We analyzed cohort and population-based smoking studies and identified effects of latency and cumulative exposures. We found cogent relationships through longitudinal rather than cross-sectional analysis, thus involving historical data. …	x	x	x	x	1
3132111	[Radon] AND [Cigarette/Tobacco]	Lung cancer	AO	Contamination of individuals by radon daughters a preliminary study.	1988	Body radon daughter contamination reflects relative individual respiratory exposures to radon daughters counts can be related both to household radon levels and to lung cancer risk factors such as sex and tobacco smoking. Radon daughters were counted by gamma spectroscopy from 180 adult residents of eastern Pennsylvania. A seven-position, 35-min scan was conducted in a mobile body counter, genera…	x	x	x	x	1
31318276	[Radon] AND [Cigarette/Tobacco]	Lung cancer	AO	Radon exposure a major cause of lung cancer.	2019	Introduction Lung cancer is the most important cause of cancer mortality. It is a multifactorial disease with multiple risk factors, including residential radon exposure. Areas covered The aim of this paper was to review the epidemiology of residential radon exposure and its impact on lung cancer risk. While tobacco is the main risk factor of lung cancer, residential radon is the first cause in n…	x	x	x	x	1
30763549	[Radon] AND [Cigarette/Tobacco]	Lung cancer	AO	BEIR VI radon The rest of the story.	2019	The National Academy of Sciences USA conducted an extensive review on the health effects of radon BEIR VI. This was a well written and researched report which had impact on regulations, laws and remediation of radon in homes. There were a number of problems with the interpretation of the report and three are focused on here. First, most of the radiation dose used to estimate risk was from homes w…	x	x	x	x	1
3015843	[Radon] AND [Cigarette/Tobacco]	Lung cancer	AO	Assessing the risks of Rn exposure the influence of cigarette smoking.	1986	The principal hazard associated with exposure to Rn progeny is lung cancer. However, most lung cancer is caused by smoking, which raises a dual problem of deriving Rn-progeny cancer risk estimates from miner populations who, in large part, are smokers and applying these estimates to the general population whose lung cancer risk, in large part, is determined by smoking habits. We examine current r…	x	x	x	x	1
29737422	[Radon] AND [Cigarette/Tobacco]	Lung cancer; Increase, lung cancer	AO	Quantitative health impact of indoor radon in France.	2018	Radon is the second leading cause of lung cancer after smoking. Since the previous quantitative risk assessment of indoor radon conducted in France, input data have changed such as, estimates of indoor radon concentrations, lung cancer rates and the prevalence of tobacco consumption. The aim of this work was to update the risk assessment of lung cancer mortality attributable to indoor radon in Fr…	x	x	x	x	1
29036707	[Radon] AND [Cigarette/Tobacco]	Lung cancer	AO	INTRODUCTION AND TESTING OF A SIMPLIFIED METHOD FOR THE EVALUATION OF THE RADON EMANATION.	2017	The radioactive noble gas radon is identified as the highest risk factor for lung cancer after smoking. The exhalation of radon from building materials can contribute to the radon indoor activity concentration. Therefore, the emanation of radon might be a crucial factor. It is defined as the release of radon from the solid soil matter into the pore space of the material. This article describes a …	x	x	x	x	1
28942328	[Radon] AND [Cigarette/Tobacco]	Lung cancer	AO	Seasonal variation of indoor radon concentration in a desert climate.	2017	Radon is one of the sources that negatively affect dwellings air quality and is ranked as a main cause of lung cancer after cigarette smoking. The indoor radon concentrations usually affected by the conditions of the environment surrounding the dwellings. Seasonal variations can have a significant impact on the indoor radon concentrations. In this article, we studied the seasonal variations of in…	x	x	x	x	1
28107552	[Radon] AND [Cigarette/Tobacco]	Lung cancer; Asthma	AO	Reflections on the history of indoor air science, focusing on the last 50 years.	2017	The scientific articles and Indoor Air conference publications of the indoor air sciences IAS during the last 50 years are summarized. In total 7524 presentations, from 79 countries, have been made at Indoor Air conferences held between 1978 49 presentations and 2014 1049 presentations. In the Web of Science, 26 992 articles on indoor air research with the word "indoor" as a search term have been…	x	x	x	x	1
27687978	[Radon] AND [Cigarette/Tobacco]	Lung cancer	AO	Radon versus other lung cancer risk factors How accurate are the attribution estimates?	2017	This notebook paper provides a brief overview of attribution estimates for some key lung cancer risk factors, focusing on indoor radon gas exposure in the U.S., UK, and Canada. Tobacco smoking represents the primary cause of lung cancer worldwide. Radon is regarded as the second leading lung cancer risk factor in the U.S. and Canada. It can be observed, however, that the reported estimates appear…	x	x	x	x	1
27032781	[Radon] AND [Cigarette/Tobacco]	Lung cancer; Increase, lung cancer	AO	MEASUREMENT OF RADON CONCENTRATION IN DWELLINGS IN THE REGION OF HIGHEST LUNG CANCER INCIDENCE IN INDIA.	2016	Indoor radon/thoron concentration has been measured in Aizawl district, Mizoram, India, which has the highest lung cancer incidence rates among males and females in India. Simultaneously, radon flux emanated from the surrounding soil of the dwellings was observed in selected places. The annual average value of concentration of radonthoron of Aizawl district is 48.822.65 Bq m-3 with a geometric st…	x	x	x	x	1
26667337	[Radon] AND [Cigarette/Tobacco]	Increase, lung cancer; Lung cancer; Pulmonary Disease, Chronic Obstructive	AO	Epidemiology of Lung Cancer.	2016	Lung cancer continues to be one of the most common causes of cancer death despite understanding the major cause of the disease cigarette smoking. Smoking increases lung cancer risk 5- to 10-fold with a clear dose-response relationship. Exposure to environmental tobacco smoke among nonsmokers increases lung cancer risk about 20. Risks for marijuana and hookah use, and the new e-cigarettes, are yet…	x	x	x	x	1
26191968	[Radon] AND [Cigarette/Tobacco]	Lung cancer	AO	Estimation of Groundwater Radon in North Carolina Using Land Use Regression and Bayesian Maximum Entropy.	2015	Radon 222Rn is a naturally occurring chemically inert, colorless, and odorless radioactive gas produced from the decay of uranium 238U, which is ubiquitous in rocks and soils worldwide. Exposure to 222Rn is likely the second leading cause of lung cancer after cigarette smoking via inhalation however, exposure through untreated groundwater is also a contributing factor to both inhalation and inges…	x	x	x	x	1
26100326	[Radon] AND [Cigarette/Tobacco]	Lung cancer	AO	Radon in indoor air of primary schools determinant factors, their variability and effective dose.	2016	Radon is a radioactive gas, abundant in granitic areas, such as in the city of Porto at the north-east of Portugal. This gas is a recognized carcinogenic agent, being appointed by the World Health Organization as the leading cause of lung cancer after smoking. The aim of this preliminary survey was to determine indoor radon concentrations in public primary schools, to analyse the main factors inf…	x	x	x	x	1
24645412	[Radon] AND [Cigarette/Tobacco]	Lung cancer; KIT	AO	Residential radon testing intentions, perceived radon severity, and tobacco use.	2014	Kentucky homeowners requesting radon test kits through the Kentucky Radon Program and randomly selected homeowners N = 129 completed a survey assessing factors related to their radon testing intentions and perceived severity of radon exposure, including social influence, perceived susceptibility, synergistic risk perception, and tobacco use. Perceived severity, social influence, and current smoki…	x	x	x	x	1
24333737	[Radon] AND [Cigarette/Tobacco]	Lung cancer	AO	Residential radon and lung cancer in never smokers. A systematic review.	2014	Radon exposure is considered the second cause of lung cancer and the first in never smokers. We aim to assess the effect of residential radon exposure on the risk of lung cancer in never smokers through a systematic review applying predefined inclusion and exclusion criteria. 14 Studies were included. Some of them point to a relationship between residential radon and lung cancer while others show…	x	x	x	x	1
23327258	[Radon] AND [Cigarette/Tobacco]	Lung cancer	AO	Radon, smoking, and lung cancer the need to refocus radon control policy.	2013	Exposure to radon is the second leading cause of lung cancer, and the risk is significantly higher for smokers than for nonsmokers. More than 85 of radon-induced lung cancer deaths are among smokers. The most powerful approach for reducing the public health burden of radon is shaped by 2 overarching principles public communication efforts that promote residential radon testing and remediation wil…	x	x	x	x	1
23079611	[Radon] AND [Cigarette/Tobacco]	Lung cancer	AO	Indoor radon monitoring near an in situ leach mining site in D G Khan, Pakistan.	2012	Indoor radon and its decay products are considered to be the second leading cause of lung cancer after cigarette smoking. This is why extensive radon surveys have been carried out in many countries of the world, including Pakistan. In this context, 25 spots were selected at workplaces in the vicinity of the uranium mining site in Dera Ghazi Khan District for indoor radon measurement. For this pur…	x	x	x	x	1
23031835	[Radon] AND [Cigarette/Tobacco]	Lung cancer	AO	A study on the thoron sensitivity of radon detectors available to Canadians.	2012	Radon and its decay products have been identified as the second leading cause of lung cancer after tobacco smoking. Thoron is an isotope of radon. With increased awareness of radon, questions related to thoron are arising from the public. Currently, only radon detectors are commonly available to Canadian homeowners. A study on the thoron sensitivities of those radon detectors was undertaken. The …	x	x	x	x	1
22887116	[Radon] AND [Cigarette/Tobacco]	Lung cancer; Increase, lung cancer	AO	Estimation of past radon exposure to indoor radon from embedded 210Po in household glass.	2012	In the present investigation, the surface-deposited polonium activities were measured in houses in the Ukhimath region of Garhwal Himalaya, India. The surface-deposited 210Po activity concentrations were found to vary from 0.7 to 15.40 Bq m-2 with an average of 5.95 Bq m-2. The radon concentration estimated on the basis of 210Po activity was found to vary from 0.29 to 700 Bq m-3 with an average v…	x	x	x	x	1
2253600	[Radon] AND [Cigarette/Tobacco]	Lung cancer	AO	A test of the linear-no threshold theory of radiation carcinogenesis.	1990	It has been pointed out that, while an ecological study cannot determine whether radon causes lung cancer, it can test the validity of a linear-no threshold relationship between them. The linear-no threshold theory predicts a substantial positive correlation between the average radon exposure in various counties and their lung cancer mortality rates. Data on living areas of houses in 411 counties…	x	x	x	x	1
22461755	[Radon] AND [Cigarette/Tobacco]	Lung cancer	AO	Residential radon appears to prevent lung cancer.	2011	Residential radon has been found to be associated with lung cancer in epidemiological/ecological studies and the researchers have inappropriately concluded that residential radon causes lung cancer. Their conclusion relates to the linear-no-threshold LNT hypothesis-based, risk-assessment paradigm however, the LNT hypothesis has been invalidated in numerous studies. It is shown in this paper that …	x	x	x	x	1
22128363	[Radon] AND [Cigarette/Tobacco]	Lung cancer	AO	Soil radon measurements in the Canadian cities.	2012	Radon has been identified as the second leading cause of lung cancer after tobacco smoking. Information on indoor radon concentrations is required to assess the lung cancer burden due to radon exposure. Since radon in soil is believed to be the main source of radon in homes, measurements of soil gas radon concentrations can be used to estimate variations in radon potential of indoor environments.…	x	x	x	x	1
21929381	[Radon] AND [Cigarette/Tobacco]	Lung cancer	AO	A current global view of environmental and occupational cancers.	2011	This review is focused on current information of avoidable environmental pollution and occupational exposure as causes of cancer. Approximately 2 to 8 of all cancers are thought to be due to occupation. In addition, occupational and environmental cancers have their own characteristics, e.g., specific chemicals and cancers, multiple factors, multiple causation and interaction, or latency period. C…	x	x	x	x	1
2184473	[Radon] AND [Cigarette/Tobacco]	Lung cancer	AO	Risk assessment methodologies for passive smoking-induced lung cancer.	1990	Risk assessment methodologies have been successfully applied to control societal risk from outdoor air pollutants. They are now being applied to indoor air pollutants such as environmental tobacco smoke ETS and radon. Nonsmokers exposures to ETS have been assessed based on dosimetry of nicotine, its metabolite, continine, and on exposure to the particulate phase of ETS. Lung cancer responses have…	x	x	x	x	1
2155648	[Radon] AND [Cigarette/Tobacco]	Lung cancer	AO	Silica exposure, silicosis, and lung cancer a necropsy study.	1990	Recent studies of the association between lung cancer and silicosis and silica dust have been inconclusive some showing positive association and some showing none. The present study matched 231 cases of lung cancer with 318 controls by year of birth. Subjects were selected from the necropsy records of the National Centre for Occupational Health. Data on intensity and duration of exposure to silic…	x	x	x	x	1
21216734	[Radon] AND [Cigarette/Tobacco]	Lung cancer	AO	An update on thoron exposure in Canada with simultaneous 222Rn and 220Rn measurements in Fredericton and Halifax.	2011	Naturally occurring isotopes of radon in indoor air are identified as the second leading cause of lung cancer after tobacco smoking. Radon-222 radon gas and radon-220 thoron gas are the most common isotopes of radon. While extensive radon surveys have been conducted, indoor thoron data are very limited. To better assess thoron exposure in Canada, radon/thoron discriminating detectors were deploye…	x	x	x	x	1
20966201	[Radon] AND [Cigarette/Tobacco]	Lung cancer	AO	Preliminary assessment of thoron exposure in Canada.	2010	Radon has been identified as the second leading cause of lung cancer after tobacco smoking. 222Rn radon gas and 220Rn thoron gas are the most common isotopes of radon. In this study, thoron exposure in Canada was assessed based on three community radon/thoron surveys conducted recently. It was confirmed that thoron was detectable in most homes and thoron progeny were present in every home surveye…	x	x	x	x	1
20872008	[Radon] AND [Cigarette/Tobacco]	Lung cancer	AO	Characteristics of thoron and thoron progeny in Canadian homes.	2011	Naturally occurring isotopes of radon in indoor air are identified as the second leading cause of lung cancer after tobacco smoking. Radon-222 radon gas and radon-220 thoron gas are the most common isotopes of radon. While the radon equilibrium factor is well established, the equilibrium factor between thoron progeny and thoron gas is still not well known. Thoron gas and progeny concentrations we…	x	x	x	x	1
2072477	[Radon] AND [Cigarette/Tobacco]	Lung Diseases	AO	The environment and the lung. Changing perspectives.	1991	The focus of public health concern and research in regard to environmental lung diseases has changed across the century. Illustrative agents include radon, indoor asbestos, environmental tobacco smoke, acidic aerosols, and oxidant gases. Tremendous progress has been made in understanding and preventing environmental lung diseases. However, we remain concerned about adverse consequences of breathi…	x	x	x	x	1
20689371	[Radon] AND [Cigarette/Tobacco]	Lung cancer	AO	Housing interventions and control of health-related chemical agents a review of the evidence.	2010	Subject matter experts systematically reviewed evidence on the effectiveness of housing interventions that affect health outcomes associated with exposure to chemical agents, such as pesticides, lead, volatile organic compounds, as well as the radon gas. Particulates were also examined, and the role of ventilation on exposures was assessed. The review included both published literature and peer-r…	x	x	x	x	1
19428051	[Radon] AND [Cigarette/Tobacco]	Lung cancer; Increase, lung cancer	AO	Comparative risk assessment of residential radon exposures in two radon-prone areas, Stei Romania and Torrelodones Spain.	2009	Radon and radon progeny are present indoors, in houses and others dwellings, representing the most important contribution to dose from natural sources of radiation. Most studies have demonstrated an increased risk of lung cancer at high concentration of radon for both smokers and nonsmokers. The work presents a comparative analysis of the radon exposure data in the two radon-prone areas, Stei, Tr…	x	x	x	x	1
19386773	[Radon] AND [Cigarette/Tobacco]	Lung cancer	AO	Simultaneous 222Rn and 220Rn measurements in Winnipeg, Canada.	2009	Naturally occurring isotopes of radon in indoor air are identified as the second leading cause of lung cancer after tobacco smoking. Winnipeg had the highest radon 222Rn concentration among 18 Canadian cities surveyed in the past. There is great interest to know the current radon as well as thoron 220Rn concentrations in Winnipeg homes. Therefore, radon-thoron discrimination detectors were deploy…	x	x	x	x	1
1877602	[Radon] AND [Cigarette/Tobacco]	Lung cancer	AO	Randomized recruitment in case-control studies.	1991	A new sampling approach for case-control studies offers a flexible alternative to frequency matching. In the "randomized recruitment" method, subjects are individually randomized to be recruited or not on the basis of investigator-imposed recruitment probabilities that can depend on both disease status and values of covariates already available or ascertained in a screening interview. When there …	x	x	x	x	1
18761730	[Radon] AND [Cigarette/Tobacco]	Lung cancer	AO	Assessment of the effectiveness of radon screening programs in reducing lung cancer mortality.	2008	The present study was aimed at assessing the health consequences of the presence of radon in Quebec homes and the possible impact of various screening programs on lung cancer mortality. Lung cancer risk due to this radioactive gas was estimated according to the cancer risk model developed by the Sixth Committee on Biological Effects of Ionizing Radiations. Objective data on residential radon expo…	x	x	x	x	1
18640998	[Radon] AND [Cigarette/Tobacco]	Lung cancer	AO	Variation of soil radon concentrations in southern Ontario.	2008	Radon has been identified as the second leading cause of lung cancer after tobacco smoking. Information on indoor radon concentrations is required to assess the lung cancer burden due to radon exposure. However, radon data in highly populated southern Ontario are very limited. Since radon in soil is believed to be the main source of radon in homes, measurements of soil gas radon concentrations ca…	x	x	x	x	1
18625986	[Radon] AND [Cigarette/Tobacco]	Lung cancer; Asthma	AO	Quality of indoor residential air and health.	2008	About 90 of our time is spent indoors where we are exposed to chemical and biological contaminants and possibly to carcinogens. These agents may influence the risk of developing nonspecific respiratory and neurologic symptoms, allergies, asthma and lung cancer. We review the sources, health effects and control strategies for several of these agents. There are conflicting data about indoor allerge…	x	x	x	x	1
18515126	[Radon] AND [Cigarette/Tobacco]	Lung cancer; Increase, lung cancer	AO	The radon issue considerations on regulatory approaches and exposure evaluations on the basis of recent epidemiological results.	2008	Recent epidemiological results have shown consistent statistically significant increases of lung cancer risk due to exposure to radon in dwellings at moderate levels of exposure, and a strong synergism with cigarette smoking. These results are summarized and discussed in relation to their possible implications for the regulatory control of radon and for future policies for the control of radon ri…	x	x	x	x	1
1838299	[Radon] AND [Cigarette/Tobacco]	Lung cancer	AO	Residential radon exposure and lung cancer an overview of published studies.	1991	A possible link between presumed or measured household radon exposure and lung cancer is reviewed on the basis of published epidemiologic studies. Evidence of a link is reported as a result of studies in Sweden findings are inconsistent elsewhere. A number of methodological problems were found. Many of the studies are ecological in design and are, therefore, primarily hypothesis generating. A num…	x	x	x	x	1
18041691	[Radon] AND [Cigarette/Tobacco]	Lung cancer; Lung Diseases	AO	Passive smoking--health consequences and effects of exposure prevention.	2008	Passive smoking is the third leading but preventable cause of death worldwide. It is associated with an elevated risk of developing acute respiratory diseases, obstructive lung disorders, lung cancer, and cardiovascular disease. Whereas the dose-response relationship between second-hand smoke exposure and respiratory diseases is likely to be linear, a non-linear dose-response curve has been obser…	x	x	x	x	1
17700253	[Radon] AND [Cigarette/Tobacco]	Lung cancer	AO	Cigarette smoking and lung cancer modeling effect modification of total exposure and intensity.	2007	BACKGROUND A recent analysis indicates that the excess odds ratio for lung cancer by smoking is described by a function that is linear in pack-years and exponential in the logarithm of smoking intensity and its square Cancer Epidemiol Biomarkers Prev. 200615517-523. The model suggests that below 15-20 cigarettes per day there is a "direct exposure rate" effect, ie, the excess odds ratio per pack-…	x	x	x	x	1
17342428	[Radon] AND [Cigarette/Tobacco]	Lung cancer	AO	Enhancement of radon exposure in smoking areas.	2007	Radium-226 is a significant source of radon-222 which enters buildings through soil, construction materials or water supply. When cigarette smoke is present, the radon daughters attach to smoke particles. Thus, the alpha radiation to a smokers lungs from the natural radon daughters is increased because of smoking. To investigate whether the cigarette tobacco itself is a potential source of indoor…	x	x	x	x	1
17017378	[Radon] AND [Cigarette/Tobacco]	Asthma; Pneumonia	AO	Indoor air quality and health in offices and other non-industrial working environments.	2006	BACKGROUND Over the last 30 years, transformation of indoor environments--in particular in office blocks--has been associated with complaints from workers of discomfort, malaise and even diseases termed Building Related Illnesses BRI which are classified as specific e.g. Legionnaire disease, asthma, hypersensitivity pneumonia or non-specific e.g. the Sick Building Syndrome. METHODS A review was m…	x	x	x	x	1
15886304	[Radon] AND [Cigarette/Tobacco]	Lung cancer	AO	Epidemiology of lung cancer looking to the future.	2005	In the United States, the 20th century witnessed the emergence of a lung cancer epidemic that peaked and began to decline by the centurys end, a decline that continues today. However, lung cancer continues to be an unabating pandemic. In research carried out over the last half of the 20th century, many factors were causally associated with lung cancer and studies were implemented to identify dete…	x	x	x	x	1
15786597	[Radon] AND [Cigarette/Tobacco]	Asthma	AO	Air pollution.	1995	Despite progress in improving ambient air quality and reducing personal exposures to air pollutants in indoor settings, population exposures to air pollutants remain widespread and are an important public health concern. Many air pollutants are associated with adverse health effects the most serious include development and exacerbation of asthma, loss of lung function, impaired neurobehavioral de…	x	x	x	x	1
15545771	[Radon] AND [Cigarette/Tobacco]	Lung cancer	AO	Residential radon exposure and lung cancer risk commentary on Cohens county-based study.	2004	The large United States county-based study in which an inverse relationship has been suggested between residential low-dose radon levels and lung cancer mortality has been reviewed. While this study has been used to evaluate the validity of the linear nonthreshold theory, the grouped nature of its data limits the usefulness of this application. Our assessment of the studys approach, including a r…	x	x	x	x	1
15186038	[Radon] AND [Cigarette/Tobacco]	Lung cancer; Lung Diseases	AO	Genetic polymorphisms and environmental risk of lung cancer a review.	2004	Lung cancer results from man-made and natural environmental exposures acting in concert with both genetic and acquired characteristics. Chronic inhalation of cigarette smoke is a major risk factor, and environmental tobacco exposure can cause lung cancer in life-long neversmokers. Air pollution, indoor-radon exposure, occupational exposures, dietary, physical activity, and reproductive history ha…	x	x	x	x	1
15174383	[Radon] AND [Cigarette/Tobacco]	Lung cancer	AO	Evaluation of radon effects on lung cancer development.	2004	In order to evaluate the effect of indoor exposure to radon and thoron on the development of lung cancer in the population of two towns of Sverdlovsk Region, epidemiologic studies were conducted using a multifactarial method of analysis. Both towns, Pervouralsk and Karpinsk, are located within the geological area with the gamma-radiation exposure dose ranging from 5 to 12 mu r/hr, and are charact…	x	x	x	x	1
15025189	[Radon] AND [Cigarette/Tobacco]	Lung cancer; Increase, lung cancer	AO	Occupation and lung cancer in nonsmokers.	2003	Lung cancer remains a significant burden on society, with approximately 157,200 deaths from this disease in 2003 occurring in the United States alone. Smoking causes the vast majority of cases and deaths from lung cancer, occupation may account for as many as 16,700 of such deaths. To examine the influence of occupation independent of smoking, we reviewed the literature on occupational lung cance…	x	x	x	x	1
14699294	[Radon] AND [Cigarette/Tobacco]	Lung cancer	AO	Lung cancer and pollution.	2003	Active smoking remains the main cause of lung cancer. However, one must not neglect the role of occupational exposure, mainly in males and also the role of pollution. In non-smoking females of countries like China, pollution due to the use of charcoal for cooking may represent the main cause for lung cancer. Outside pollution is mainly due to combustion of fossil fuels and to diesel exhaust. Insi…	x	x	x	x	1
12705451	[Radon] AND [Cigarette/Tobacco]	Lung cancer	AO	Smoking as a confounder in ecologic correlations of cancer mortality rates with average county radon levels.	2003	Cohen has reported a negative correlation between lung cancer mortality and average radon levels by county. In this paper, the correlation of U.S. county mortality rates for various types of cancers during the period 1970-1994 with Cohens radon measurements is examined. In general, quantitatively similar, strongly negative correlations are found for cancers strongly linked to cigarette smoking, w…	x	x	x	x	1
12379879	[Radon] AND [Cigarette/Tobacco]	Lung cancer	AO	Biologic damage resulting from exposure to tobacco smoke and from radon implication for preventive interventions.	2002	Cigarette smoking and residential radon are, respectively, the first and second leading cause of lung cancer in the United States today. Of the approximately 157 000 lung deaths occurring in 2000, approximately 90 can be attributed to cigarette smoking and 30 of the lung cancer deaths among non-smokers can be attributed to residential radon exposure. Although dwarfed by cigarette related lung can…	x	x	x	x	1
12226059	[Radon] AND [Cigarette/Tobacco]	Asthma; Bronchitis, Chronic	AO	Passive smoking exposure a risk factor for chronic bronchitis and asthma in adults?	2002	OBJECTIVE The effects of passive smoke exposure on respiratory health are still under debate. Therefore, we examined the risk of respiratory symptoms related to passive smoke exposure among German adults within the European Community Respiratory Health Survey. METHODS The questionnaire data of the population-based sample n = 1,890 were analyzed. Multiple logistic regression models were carried ou…	x	x	x	x	1
11760568	[Radon] AND [Cigarette/Tobacco]	Lung cancer	AO	Radon.	2001	Residential and occupational exposure to radon is the second leading cause of lung cancer after cigarette smoking. As many as eight million homes in the US have elevated radon levels according to Environmental Protection Agency estimates. High exposure levels in homes are largely a result of radon-contaminated gas rising from the soil. This makes it an unusual indoor air pollutant in that it has …	x	x	x	x	1
11416777	[Radon] AND [Cigarette/Tobacco]	Lung cancer	AO	Residential radon and lung cancer among never-smokers in Sweden.	2001	In this study, we attempted to reduce existing uncertainty about the relative risk of lung cancer from residential radon exposure among never-smokers. Comprehensive measurements of domestic radon were performed for 258 never-smoking lung cancer cases and 487 never-smoking controls from five Swedish case-control studies. With additional never-smokers from a previous case-control study of lung canc…	x	x	x	x	1
11379938	[Radon] AND [Cigarette/Tobacco]	Lung cancer; Increase, lung cancer	AO	Experience from retrospective radon exposure estimations for individuals in a radon epidemiological study using solid-state nuclear track detectors.	2001	The relation between increased risk of lung cancer and exposure to indoor radon is assessed in epidemiological studies. Both the quality and reliability of smoking data and the radon exposure data are of primary importance. Contemporary measurement of radon concentration in the dwellings of individuals in a case-control study is traditionally used to assess past history of radon exposure. These a…	x	x	x	x	1
11242640	[Radon] AND [Cigarette/Tobacco]	Lung Diseases; Increase, lung cancer; Lung cancer	AO	Lung cancer.	2001	The number of lung cancer deaths in Japan has been continuously increasing for decades, mainly because of the growing size of the elderly population. In contrast, age-specific lung cancer death rates for those aged under 79 years plateaued recently, reflecting the decreasing smoking rates since 1966. However, the smoking rate for males 54 in 1999 is still extraordinarily high in Japan compared to…	x	x	x	x	1
10982577	[Radon] AND [Cigarette/Tobacco]	Lung cancer; KIT	AO	Using radon risk to motivate smoking reduction evaluation of written materials and brief telephone counselling.	2000	OBJECTIVE Radon and cigarette smoking have synergistic effects on lung cancer, even when radon concentrations are relatively low. Working through an electric utility company, we sought to reach smoking households with low radon concentrations and motivate smoking cessation or prohibiting smoking in the home. DESIGN Eligible homes n = 714 were randomised to receive 1 the Environmental Protection A…	x	x	x	x	1
10901327	[Radon] AND [Cigarette/Tobacco]	Lung cancer; Increase, lung cancer	AO	Occupational exposure and lung cancer risk a population-based case-referent study in Sweden.	2000	This case-referent study investigated the lung cancer risk from occupational exposure to diesel exhaust, mixed motor exhaust, other combustion products, asbestos, metals, oil mist, and welding fumes. All cases of lung cancer in males aged 40-75 years among stable residents of Stockholm County, Sweden, were identified from 1985 to 1990. Referents were selected as a stratified age, inclusion year r…	x	x	x	x	1
10868769 (#1)	[Radon] AND [Cigarette/Tobacco]	Lung cancer	AO	Radon and cigarette smoking perceptions of this synergistic health risk.	2000	Past approaches to the measurement of the perceived risk of combined hazards have failed to demonstrate awareness of synergy S. E. Hampson et al., 1998 D. Hermand, E. Mullet, amp B. Coutelle, 1995 D. Hermand, E. Mullet, amp S. Lavieville, 1997. Respondents N = 650 were provided with information about the synergistic risk of lung cancer from the combination of smoking and radon, and their risk per…	x	x	x	x	1
10670548	[Radon] AND [Cigarette/Tobacco]	Lung cancer	AO	Environmental tobacco smoke and lung cancer a case-control study in Germany.	2000	To assess the association between exposure to environmental tobacco smoke ETS and lung cancer, the authors personally interviewed 292 lifelong nonsmoking lung cancer cases recruited from 15 hospitals in the study area and 1,338 nonsmoking controls randomly selected by population registries between 1990 and 1996 in Germany. Subjects were asked by a standardized questionnaire about exposure to ETS …	x	x	x	x	1
10479611	[Radon] AND [Cigarette/Tobacco]	KIT; Increase, lung cancer; Lung cancer	AO	Radon-smoking synergy A population-based behavioral risk reduction approach.	1999	BACKGROUND Radon and cigarette smoking have a synergistic, multiplicative effect on lung cancer rates. Smokers, and perhaps nonsmoking residents, of smoking households are at increased risk for lung cancer even when radon levels are relatively low. A behavioral risk reduction strategy emphasizing smoking cessation is proposed and data are presented from pilot studies and a short-term evaluation o…	x	x	x	x	1
9664729	[Radon] AND [Cigarette/Tobacco]	Lung cancer	AO	Lay understanding of synergistic risk the case of radon and cigarette smoking.	1998	The combination of radon and smoking produces a synergistic risk of lung cancer. Lay understanding of this risk was examined from the perspectives of mental models theory, the psychometric approach to risk perception, and optimistic bias. As assessed by interview, participants N = 50 had more extensive mental models for the risks of smoking than for the risks of radon or the combination of radon …	human	x	x	x	2
8891537	[Radon] AND [Cigarette/Tobacco]	Lung cancer; Increase, lung cancer	AO	The epidemiology of lung cancer review of risk factors and Spanish data.	1996	Lung cancer is the main form of cancer among men both in Spain and in the rest of europe. However, Spanish incidence rates are among the lowest of the European registries, especially for women. In this country, lung cancer mortality increased much more rapidly for men than for women between the fifties and the eighties. This increase was larger for lung cancer than for any other site. The trend o…	human	x	x	x	2
8724218	[Radon] AND [Cigarette/Tobacco]	Increase, lung cancer; Asthma; Pneumonia; Lung cancer; Bronchitis, Chronic	AO	Female lung cancer.	1996	Female lung cancer death rates increased by more than 550 percent between 1950 and 1991. In 1986 lung cancer surpassed breast cancer to become the leading cause of cancer death in women in the United States. The lung cancer epidemic is primarily attributable to cigarette smoking, which is responsible for at least 80 of the disease in women. There are gender differences in the distribution of lung…	human	x	x	x	2
8462243	[Radon] AND [Cigarette/Tobacco]	Lung cancer	AO	Epidemiology and etiology of lung cancer.	1993	Lung cancer incidence and mortality have increased sharply during this century, making it a common cause of death and the most frequent fatal cancer in men and women. The known behavioral and environmental causes--cigarette smoking, asbestos and other occupational carcinogens, radon, and environmental tobacco smoke--are responsible for the majority of cases. Although the proportion of adults who …	human	x	x	x	2
8416770	[Radon] AND [Cigarette/Tobacco]	Lung cancer; Increase, lung cancer	AO	The epidemiology of lung cancer.	1993	Lung cancer rates and mortality have risen in epidemic proportions in the United States and other industrialized nations during the 20th century. Case-control and cohort studies performed in the 1950s and 1960s firmly established cigarette smoking as the single greatest risk factor for lung cancer. In the United States, overall lung cancer mortality rates in men and women rose progressively from …	human	x	x	x	2
8234952	[Radon] AND [Cigarette/Tobacco]	Lung cancer	AO	Radon testing behavior in a sample of individuals with high home radon screening measurements.	1993	Although radon exposure has been identified as the second leading cause of lung cancer, fewer than 6 of U.S. homeowners test their homes for radon. This report examines participants follow-up radon testing behavior subsequent to receiving an initial screening radon level greater than 20 pCi/L. Sixty-two participants in the Iowa State-Wide Rural Radon Screening Survey who had radon screening measu…	human	x	x	x	2
8205275	[Radon] AND [Cigarette/Tobacco]	Lung cancer; Increase, lung cancer	AO	The epidemiology of lung cancer in women.	1994	Female lung cancer mortality rates have increased dramatically since 1950, and in 1987 lung cancer surpassed breast cancer as the leading cause of cancer death among US women. The epidemic in women, as in men, is attributable to cigarette smoking. Smoking prevalence in women peaked in the 1960s and 1970s and has since been declining, although fully 23.5 of adult women were current smokers in 1991…	human	x	x	x	2
8196038	[Radon] AND [Cigarette/Tobacco]	Lung cancer	AO	60 years of chemical carcinogens Sir Ernest Kennaway in retirement.	1994	1992 marks the sixtieth anniversary of the publication of the first paper on the production of cancer by pure hydrocarbons, by the team at the Chester Beatty Research Institute headed by Professor Kennaway. Studies on polycyclic aromatic hydrocarbons and other chemical carcinogens continued to thrive under his leadership in succeeding years at the Chester Beatty and beyond, into his retirement in…	human	x	x	x	2
7814250	[Radon] AND [Cigarette/Tobacco]	Lung cancer; Increase, lung cancer	AO	Test of the linear-no threshold theory of radiation carcinogenesis for inhaled radon decay products.	1995	Data on lung cancer mortality rates vs. average radon concentration in homes for 1,601 U.S. counties are used to test the linear-no threshold theory. The widely recognized problems with ecological studies, as applied to this work, are addressed extensively. With or without corrections for variations in smoking prevalence, there is a strong tendency for lung cancer rates to decrease with increasin…	human	x	x	x	2
7780346	[Radon] AND [Cigarette/Tobacco]	Lung cancer; Increase, lung cancer	AO	Role of outdoor and indoor air pollution in the etiology of lung cancer.	1995	The results of a case-control study of lung cancer risk in female non-smokers in Moscow are presented in the paper. The increase in a risk of lung cancer was found to be associated with outdoor pollution, the closure of the residence to chemical industry and ferrous and non-ferrous smelters, environmental tobacco smoke from husbands and exposure to radon Rn at home. The relative risk of lung canc…	human	x	x	x	2
6708847	[Radon] AND [Cigarette/Tobacco]	Lung cancer; Increase, lung cancer	AO	Room for a role for radon in lung cancer causation?	1984	Reduced ventilation due to energy saving has focussed interest on a potential lung cancer risk from increased indoor concentrations of alpha-emitting radon and radon daughters, escaping from building materials and from the ground. Some preliminary studies now also indicate a hazard to be present as related to radon daughter exposure in homes. However, the indoor radon daughter levels have probabl…	human	x	x	x	2
3830117	[Radon] AND [Cigarette/Tobacco]	Lung cancer	AO	Overview of the risk of respiratory cancer from airborne contaminants.	1986	This overview on defining risk of respiratory cancer from airborne pollutants summarizes broad issues related to a number of the environmental agents that are discussed in the articles that follow. Lung cancer kills more than 100,000 people annually and is the major form of cancer in both sexes in middle age. Cigarette smoking is the major cause of respiratory cancer and must be taken into accoun…	human	x	x	x	2
36728241	[Radon] AND [Cigarette/Tobacco]	Asthma	AO	Environment and the development of severe asthma in inner city population.	2023	PURPOSE OF REVIEW Higher asthma prevalence and morbidity are seen in inner-city areas, disproportionately affecting low-income families living in substandard housing. Children within these families experience more frequent asthma exacerbations, acute care and emergency department visits, and hospitalizations, thus characterizing severe asthma. In this review, we assess recent published literature…	human	x	x	x	2
36209792	[Radon] AND [Cigarette/Tobacco]	Pulmonary Disease, Chronic Obstructive	AO	Particle radioactivity from radon decay products and reduced pulmonary function among chronic obstructive pulmonary disease patients.	2023	BACKGROUND Radon 222Rn decay products can attach to particles in the air, be inhaled, and potentially cause airway damage. RESEARCH QUESTION Is short-term exposure to particle radioactivity PR attributable to radon decay products emitted from particulate matter 2.5 m in diameter PM2.5 associated with pulmonary function in chronic obstructive pulmonary disease COPD patients? STUDY DESIGN AND METHO…	human	x	x	x	2
36177300	[Radon] AND [Cigarette/Tobacco]	Lung cancer	AO	Lung cancer mortality trends in Colombia, 1985-2018Tendncias na mortalidade por cncer de pulmo na Colmbia de 1985 a 2018.	2022	Objective To determine lung cancer mortality trends in Colombia during the period 1985-2018 in the population aged 35 years and over and identify changes in the trend. Methods Analysis of mortality time series. The specific standardized rates by sex and age group were calculated. Using joinpoint regression, the annual percentage change in the rates was estimated and points of change were identifi…	human	x	x	x	2
35142054	[Radon] AND [Cigarette/Tobacco]	Asthma	AO	Risk factors for chronic obstructive pulmonary disease in never-smokers A systematic review.	2022	INTRODUCTION Relatively little is known about the risk factors for chronic obstructive pulmonary disease COPD in never-smokers, and these factors have not yet been fully characterised. This study therefore sought to analyse COPD risk factors in never-smokers by conducting a systematic review of the literature on the topic. MATERIALS AND METHODS We performed a search in PubMed Medline and Embase f…	human	x	x	x	2
35062477	[Radon] AND [Cigarette/Tobacco]	Lung cancer	AO	Novel Algorithm for Radon Real-Time Measurements with a Pixelated Detector.	2022	Nowadays, radon gas exposure is considered one of the main health concerns for the population because, by carrying about half the total dose due to environmental radioactivity, it is the second cause of lung cancer after smoking. Due to a relatively long half-life of 3.82 days, the chemical inertia and since its parent Ra-226 is largely diffuse on the earths crust and especially in the building m…	human	x	x	x	2
35022255	[Radon] AND [Cigarette/Tobacco]	Lung Diseases; Lung cancer	AO	The evolving landscape of sex-based differences in lung cancer a distinct disease in women.	2022	In stark contrast to a few decades ago when lung cancer was predominantly a disease of men who smoke, incidence rates of lung cancer in women are now comparable to or higher than those in men and are rising alarmingly in many parts of the world. Women face a unique set of risk factors for lung cancer compared to men. These include exogenous exposures including radon, prior radiation, and fumes fr…	human	x	x	x	2
34815629	[Radon] AND [Cigarette/Tobacco]	Lung cancer	AO	Lung cancer risk in never-smokers An overview of environmental and genetic factors.	2021	Lung cancer is the leading cause of cancer-related mortality globally, accounting for 1.8 million deaths in 2020. While the vast majority are caused by tobacco smoking, 15-25 of all lung cancer cases occur in lifelong never-smokers. The International Agency for Research on Cancer IARC has classified multiple agents with sufficient evidence for lung carcinogenesis in humans, which include tobacco …	human	x	x	x	2
34667994	[Radon] AND [Cigarette/Tobacco]	nodules in lung; Nodules on lung; Lung cancer; Nodules on lung; nodules in lung	AO	ATS Core Curriculum 2021. Adult Pulmonary Medicine Thoracic Oncology.	2021	The American Thoracic Society Core Curriculum updates clinicians annually in adult and pediatric pulmonary disease, medical critical care, and sleep medicine at the annual international conference. The 2021 Pulmonary Core Curriculum focuses on lung cancer and include risks and prevention, screening, nodules, therapeutics and associated pulmonary toxicities, and malignant pleural effusions. Althou…	human	x	x	x	2
34473346	[Radon] AND [Cigarette/Tobacco]	Asthma	AO	Trajectories of asthma and allergy symptoms from childhood to adulthood.	2022	BACKGROUND Phenotypes of asthma and allergic diseases are mainly studied separately for children and adults. To explore the role of adolescence and young adulthood, we investigated symptom trajectories at the transition from childhood into adulthood. METHODS Latent class analysis LCA was conducted in a population initially recruited for the German arm of Phase II of the International Study of Ast…	human	x	x	x	2
34357133	[Radon] AND [Cigarette/Tobacco]	Lung cancer	AO	Identification by MicroRNA Analysis of Environmental Risk Factors Bearing Pathogenic Relevance in Non-Smoker Lung Cancer.	2021	MicroRNA and DNA adduct biomarkers may be used to identify the contribution of environmental pollution to some types of cancers. The aim of this study was to use integrated DNA adducts and microRNAs analyses to study retrospectively the contribution of exposures to environmental carcinogens to lung cancer in 64 non-smokers living in Sicily and Catania city near to the Etna volcano. MicroRNAs were…	human	x	x	x	2
34051201	[Radon] AND [Cigarette/Tobacco]	Lung cancer	AO	Lung cancer mortality attributable to residential radon exposure in Spain and its regions.	2021	Lung cancer has the highest cancer mortality rate in developed countries. The principal risk factor for lung cancer is tobacco use, with residential radon being the leading risk factor among never smokers and the second among ever smokers. We sought to estimate mortality attributable to residential radon exposure in Spain and its Autonomous Regions, with correction for dwelling height and differe…	human	x	x	x	2
33922246	[Radon] AND [Cigarette/Tobacco]	Lung cancer	AO	Radon Adsorption in Charcoal.	2021	Radon is pervasive in our environment and the second leading cause of lung cancer induction after smoking. Therefore, the measurement of radon activity concentrations in homes is important. The use of charcoal is an easy and cost-efficient method for this purpose, as radon can bind to charcoal via Van der Waals interaction. Admittedly, there are potential influencing factors during exposure that …	human	x	x	x	2
33862422	[Radon] AND [Cigarette/Tobacco]	Lung cancer	AO	Radon risk mapping A new geostatistical method based on Lorenz Curve and Gini index.	2021	In confined spaces such as living environments and workplaces, the concentration levels of radon Rn222 can be very high as compared to the external environment. Since Rn has been classified as the second leading cause of lung cancer after cigarette smoking, to apply efficient locally based risk reduction actions, dense maps of indoor radon concentration are needed. These maps would provide inform…	human	x	x	x	2
33302585	[Radon] AND [Cigarette/Tobacco]	Lung cancer	AO	High School Students as Citizen Scientists to Decrease Radon Exposure.	2020	Residents in rural Kentucky KY and suburban Ohio OH expressed concerns about radon exposure and lung cancer. Although 85 of lung cancer cases are caused by tobacco smoke, radon exposure accounts for 10-15 of lung cancer cases. Academic and community members from the University of KY and the University of Cincinnati developed and pilot-tested a family-centered, youth-engaged home radon testing too…	human	x	x	x	2
33254926	[Radon] AND [Cigarette/Tobacco]	Lung cancer	AO	Mapping the geogenic radon potential for Germany by machine learning.	2021	The radioactive gas radon Rn is considered as an indoor air pollutant due to its detrimental effects on human health. In fact, exposure to Rn belongs to the most important causes for lung cancer after tobacco smoking. The dominant source of indoor Rn is the ground beneath the house. The geogenic Rn potential GRP - a function of soil gas Rn concentration and soil gas permeability - quantifies what…	human	x	x	x	2
32531923	[Radon] AND [Cigarette/Tobacco]	Lung cancer	AO	Development of a Geogenic Radon Hazard Index-Concept, History, Experiences.	2020	Exposure to indoor radon at home and in workplaces constitutes a serious public health risk and is the second most prevalent cause of lung cancer after tobacco smoking. Indoor radon concentration is to a large extent controlled by so-called geogenic radon, which is radon generated in the ground. While indoor radon has been mapped in many parts of Europe, this is not the case for its geogenic cont…	human	x	x	x	2
32490267	[Radon] AND [Cigarette/Tobacco]	Lung cancer	AO	Evaluation of radon exposure risk and lung cancer incidence/mortality in South-eastern Italy.	2020	INTRODUCTION Radon and its decay products may cause substantial health damage after long-term exposure. The aim of the study was to perform a spatial analysis of radon concentration in the Salento peninsula, province of Lecce South-eastern Italy in order to better characterize possible risk for human health, with specific focus on lung cancer. METHODS Based on previous radon monitoring campaigns …	human	x	x	x	2
32197610	[Radon] AND [Cigarette/Tobacco]	Lung cancer	AO	Economic valuation of health benefits from using geologic data to communicate radon risk potential.	2020	BACKGROUND Radon exposure is the second leading cause of lung cancer worldwide and represents a major health concern within and outside the United States. Mitigating exposure to radon is especially critical in places with high rates of tobacco smoking e.g., Kentucky, USA, as radon-induced lung cancer is markedly greater among people exposed to tobacco smoke. Despite homes being a common source of…	human	x	x	x	2
32062313	[Radon] AND [Cigarette/Tobacco]	Lung Diseases; Lung cancer; Asthma	AO	Lung cancer in never smokers The role of different risk factors other than tobacco smoking.	2020	Lung cancer LC, the leading cause of cancer-related deaths worldwide, is a complex and highly heterogeneous disease. Additional to its biological complexity, LC patients are often confronted with a high degree of stigma, mostly from the association of the disease with tobacco. Nonetheless, a proportion of LC patients are never-smokers, a population which we are beginning to comprehensively explor…	human	x	x	x	2
3201187	[Radon] AND [Cigarette/Tobacco]	Lung cancer; Increase, lung cancer	AO	Indoor radon exposure and active and passive smoking in relation to the occurrence of lung cancer.	1988	Exposure to indoor radon and radon daughters is currently attracting great interest as a possible cause of lung cancer. This concern is supported by several studies, most of them relatively small in numbers or weak in the assessment of exposure. This study encompasses 177 persons with lung cancer and 677 noncancer referents, all deceased and with 30 years or more of residency in the same house in…	human	x	x	x	2
31697655	[Radon] AND [Cigarette/Tobacco]	Lung cancer	AO	Lung Cancer Incidence in Nonmetropolitan and Metropolitan Counties - United States, 2007-2016.	2019	Lung and bronchus lung cancer is the leading cause of cancer death in the United States 1. In 2016, 148,869 lung cancer deaths were reported. Most lung cancers can be attributed to modifiable exposures, such as tobacco use, secondhand smoke, radon, and asbestos 1. Exposure to lung cancer risk factors vary over time and by characteristics such as sex, age, and nonmetropolitan or metropolitan resid…	human	x	x	x	2
31667121	[Radon] AND [Cigarette/Tobacco]	Lung cancer	AO	First indoor radon mapping and assessment excess lifetime cancer risk in Iran.	2019	Radon 222Rn is believed to be the main contributor to lung cancer second to smoking. The first national indoor radon map derived from some scattered regional radon surveys in Iran. The arithmetic mean of indoor radon concentration was calculated to 117.4 97.7 Bq/m3. The mean excess life time cancer risk ELCR values were found to be in the range of 0.1-4.26, with an overall average value of 1.01. …	human	x	x	x	2
31517597	[Radon] AND [Cigarette/Tobacco]	Lung cancer; KIT	AO	FRESH Long-Term Outcomes of a Randomized Trial to Reduce Radon and Tobacco Smoke in the Home.	2019	INTRODUCTION Tobacco smoke and radon are the leading causes of lung cancer. The FRESH intervention was a randomized controlled trial of 515 homeowners to promote stage of action to reduce radon and air nicotine levels. METHODS We studied 515 participants, 257 in a treatment group and 258 in a control group. Treatment participants received free radon and air nicotine test kits, report back, and te…	human	x	x	x	2
31330007	[Radon] AND [Cigarette/Tobacco]	Lung cancer	AO	IDENTIFICATION OF NOVEL BIOMARKERS FOR LUNG CANCER RISK IN HIGH LEVELS OF RADON BY PROTEOMICS A PILOT STUDY.	2019	Radon is the second most important risk factor for lung cancer after tobacco smoking. In Chiang Mai, Thailand, the values of indoor radon activity concentrations are considerably higher than global average values and it is a highest level among East Asian countries. The aim of our study is to identify novel biomarkers for lung cancer risk in high radon areas using a proteomic approach. In our tra…	human	x	x	x	2
30851418	[Radon] AND [Cigarette/Tobacco]	Lung cancer	AO	Lung cancer survival among never smokers.	2019	Lung cancer incidence among never smokers has increased in recent decades with 10-30 of all lung cancers occurring in never smokers, where exposure to residential radon is the leading cause of this disease. Lung cancer survival is low, ranging from 12 to 16 at 5 years of diagnosis. There is scant evidence to date on survival from this disease in never smokers. We aim to evaluate lung cancer survi…	human	x	x	x	2
30833249	[Radon] AND [Cigarette/Tobacco]	Lung cancer; Increase, lung cancer	AO	Radiation in different types of building, human health.	2019	Radon is a radioactive gas permanently produced in rocks, soils, building materials as an indirect decay product of uranium and thorium. According to EPA, radon is the second most frequent cause of lung cancer, after cigarette smoking. The aim of survey was to measure radon levels and ambient gamma dose rates in dwellings in various types of buildings situated on various ground and to evaluate he…	human	x	x	x	2
30274365	[Radon] AND [Cigarette/Tobacco]	Lung cancer	AO	Short Telomere Length as a Biomarker Risk of Lung Cancer Development Induced by High Radon Levels A Pilot Study.	2018	Long-term exposure to radon has been determined to be the second leading cause of lung cancer after tobacco smoking. However, an in-depth study of this topic has not been explicitly carried out in Chiang Mai Thailand. This paper presents the results of an indoor radon level measurement campaign in dwellings of Chiang Mai using total of 110 detectors CR-39 during one year. The results show that th…	human	x	x	x	2
30092646	[Radon] AND [Cigarette/Tobacco]	Lung cancer	AO	Perceived Synergistic Risk for Lung Cancer After Environmental Report-Back Study on Home Exposure to Tobacco Smoke and Radon.	2019	PURPOSE To examine the short-term impact of a personalized environmental report-back intervention to reduce home exposure to tobacco smoke and radon on perception of synergistic risk for lung cancer. Radon-induced lung cancer is more common among those exposed to tobacco smoke. DESIGN Randomized controlled trial. SETTING Primary care clinics and a pharmacy waiting area at a University Medical Cen…	human	x	x	x	2
30078335	[Radon] AND [Cigarette/Tobacco]	Lung cancer; KIT	AO	A Randomized Trial to Test Personalized Environmental Report Back to Reduce Lung Cancer Risk.	2019	BACKGROUND More radon-related lung cancers occur among those exposed to tobacco smoke. OBJECTIVES To test the effects of a personalized environmental report back intervention on change in stage of action for air nicotine testing and adopting a smoke-free home and radon testing and mitigation from baseline to 3 months postintervention. METHODS The study design used a two-arm parallel groups random…	human	x	x	x	2
30050761	[Radon] AND [Cigarette/Tobacco]	Lung cancer	AO	The epidemiology of lung cancer.	2018	The incidence and mortality from lung cancer is decreasing in the US due to decades of public education and tobacco control policies, but are increasing elsewhere in the world related to the commencement of the tobacco epidemic in various countries and populations in the developing world. Individual cigarette smoking is by far the most common risk factor for lung carcinoma other risks include pas…	human	x	x	x	2
29486412	[Radon] AND [Cigarette/Tobacco]	Lung cancer	AO	Estimation of residential radon exposure and definition of Radon Priority Areas based on expected lung cancer incidence.	2018	Radon is a naturally occurring gas, classified as a Class 1 human carcinogen, being the second most significant cause of lung cancer after tobacco smoking. A robust spatial definition of radon distribution in the built environment is therefore essential for understanding the relationship between radon exposure and its adverse health effects on the general population. Using Ireland as a case study…	human	x	x	x	2
29353778	[Radon] AND [Cigarette/Tobacco]	Lung cancer	AO	Estimating the burden of lung cancer and the efficiency of home radon mitigation systems in some Canadian provinces.	2018	Lung cancer LC is the leading cause of death of cancer in Canada in both men and women, and indoor radon is the second leading cause of LC after tobacco smoking. The Population Attributable Risk PAR is used to assess radon exposure risk. In this work we estimate the burden of LC in some Canadian provinces. We use the PAR to identify the radon levels responsible for most LC cases. Finally, we use …	human	x	x	x	2
29332372	[Radon] AND [Cigarette/Tobacco]	Lung cancer	AO	Measurement and modeling of indoor radon concentrations in residential buildings.	2018	Radon, the primary constituent of natural radiation, is the second leading environmental cause of lung cancer after smoking. To confirm a relationship between indoor radon exposure and lung cancer, estimating cumulative levels of exposure to indoor radon for an individual or population is necessary. This study sought to develop a model for estimate indoor radon concentrations in Korea. Especially…	human	x	x	x	2
29135198	[Radon] AND [Cigarette/Tobacco]	Lung cancer; KIT	AO	Lung Cancer Worry and Home Screening for Radon and Secondhand Smoke in Renters.	2017	Lung cancer is largely preventable by eliminating tobacco smoke and radon exposure. This exploratory study assessed the relationships of demographic factors, including having one or more smokers living in the household, and a lung cancer worry and b completion of home screening for radon and secondhand smoke SHS among renters. A convenience sample of renters N = 47 received free test kits for rad…	human	x	x	x	2
28828814	[Radon] AND [Cigarette/Tobacco]	Lung cancer	AO	Lung cancer incidence associated with radon exposure in Norwegian homes.	2017	BACKGROUND Radioactive radon gas is generated from uranium and thorium in underlying rocks and seeps into buildings. The gas and its decay products emit carcinogenic radiation and are regarded as the second most important risk factor for lung cancer after active tobacco smoking. The average radon concentration in Norwegian homes is higher than in most other Western countries. From a health and co…	human	x	x	x	2
28661307	[Radon] AND [Cigarette/Tobacco]	Asthma	AO	Policy Approaches to Improving Housing and Health.	2017	Safe and healthy housing conditions are critical to improving population health, particularly for the most vulnerable - young children, senior citizens, and individuals with chronic illnesses and disabilities - who spend more time at home and are more susceptible to illness and injury. Across the country, millions of Americans are exposed to lead, radon, asbestos, volatile organic compounds, pest…	human	x	x	x	2
28222077	[Radon] AND [Cigarette/Tobacco]	Lung cancer	AO	Association of Smoking in the Home With Lung Cancer Worry, Perceived Risk, and Synergistic Risk.	2017	PURPOSE/OBJECTIVES To examine the association of smoking in the home with lung cancer worry, perceived risk, and synergistic risk, controlling for sociodemographics, family history of lung cancer, and health-related self-concept. The hypothesis is that participants with smoking in the home would have higher scores for lung cancer worry, perceived risk, and synergistic risk. . DESIGN Cross-section…	human	x	x	x	2
27778529	[Radon] AND [Cigarette/Tobacco]	Pulmonary Disease, Chronic Obstructive	AO	Residential radon and COPD. An ecological study in Galicia, Spain.	2017	PURPOSE Radon is a human lung carcinogen but it might be linked with other respiratory diseases. We aimed to assess the relationship between residential radon exposure and COPD chronic obstructive pulmonary disease prevalence and hospital admissions at a municipal level. MATERIALS AND METHODS We designed an ecological study where we included those municipalities with at least three radon measurem…	human	x	x	x	2
27594696	[Radon] AND [Cigarette/Tobacco]	Lung cancer; Increase, lung cancer	AO	Assessment of radon-induced health risk for occupants of a house built on uranium ore residue.	2016	BACKGROUND At the request of French public authorities, the Institute of Radiological Protection and Nuclear Safety has assessed the radiological situation of a house built on uranium ore residues in Haute-Vienne and the health risks induced from exposure to radon for all occupants. Classified as a lung carcinogen by the World Health Organization, radon is a proven cause of lung cancer in case of…	human	x	x	x	2
27443982	[Radon] AND [Cigarette/Tobacco]	Lung cancer	AO	Radon, Secondhand Smoke, and Children in the Home Creating a Teachable Moment for Lung Cancer Prevention.	2016	OBJECTIVE This study determined whether having minor children in the home was associated with the teachable moment TM constructs of lung cancer worry, perceived risk, health-related self-concept, and the novel construct of synergistic risk. DESIGN AND SAMPLE Secondary data analysis of baseline data from a randomized controlled trial of an intervention to reduce home exposure to radon and secondha…	human	x	x	x	2
27083463	[Radon] AND [Cigarette/Tobacco]	Lung cancer	AO	Radon testing in rapid access lung clinics an opportunity for secondary prevention.	2017	BACKGROUND Radon is a naturally occurring radioactive gas and a level 1 carcinogen. It acts synergistically with cigarette smoke to cause lung cancer. In Ireland, radon is estimated to be associated with 13 of all lung cancers. Rapid access lung cancer clinics RALCs were established in the UK and Ireland to improve lung cancer management outcomes. There has been no attempt to date to provide advi…	human	x	x	x	2
26985395	[Radon] AND [Cigarette/Tobacco]	Increase, lung cancer; Lung Neoplasms; Lung cancer	AO	Residential radon and environmental burden of disease among Non-smokers.	2016	BACKGROUND Lung cancer was the second highest absolute cancer incidence globally and the first cause of cancer mortality in 2014. Indoor radon is the second leading risk factor of lung cancer after cigarette smoking among ever smokers and the first among non-smokers. Environmental burden of disease EBD attributable to residential radon among non-smokers is critical for identifying threats to popu…	human	x	x	x	2
26530820	[Radon] AND [Cigarette/Tobacco]	Lung cancer	AO	Using lung cancer mortality to indirectly approximate smoking patterns in space.	2015	Smoking is the leading cause of lung cancer. Non-smoking factors have been associated with the disease. Existing Swiss survey data only capture the country partially and temporal coverage does not allow for a time lag between exposure to tobacco and lung cancer outbreak. Knowledge about the distribution of tobacco-use is essential to estimate its contribution to disease burden. Bayesian regressio…	human	x	x	x	2
26435745	[Radon] AND [Cigarette/Tobacco]	Lung cancer; Increase, lung cancer	AO	The role of the implementation of policies for the prevention of exposure to Radon in Brazil-a strategy for controlling the risk of developing lung cancer.	2015	Lung cancer is the leading cause of cancer death in the United States and other industrialised countries. The most important risk factor is active smoking. However, given the increased incidence of lung cancer in non-smokers, it is necessary to improve knowledge regarding other risk factors. Radon Rn is a noble gas and is the most important natural source of human exposure to ionizing radiation. …	human	x	x	x	2
25916488	[Radon] AND [Cigarette/Tobacco]	Lung Diseases; Lung cancer; Asthma	AO	Health effects of home energy efficiency interventions in England a modelling study.	2015	OBJECTIVE To assess potential public health impacts of changes to indoor air quality and temperature due to energy efficiency retrofits in English dwellings to meet 2030 carbon reduction targets. DESIGN Health impact modelling study. SETTING England. PARTICIPANTS English household population. INTERVENTION Three retrofit scenarios were modelled 1 fabric and ventilation retrofits installed assuming…	human	x	x	x	2
25426296	[Radon] AND [Cigarette/Tobacco]	Lung cancer; KIT	AO	Perceived risk of exposure to indoor residential radon and its relationship to willingness to test among health care providers in Tehran.	2014	BACKGROUND Radon exposure is the second cause of lung cancer after exposure to tobacco smoke and the first cause in nonsmokers. The purpose of this study was to assess perceived risk of exposure to indoor residential radon among health care providers in urban and rural health centers affiliated to Tehran University of Medical Sciences. METHOD In 2012-2013, a survey was carried out on 462 health c…	human	x	x	x	2
25034571	[Radon] AND [Cigarette/Tobacco]	Lung cancer; Increase, lung cancer	AO	Lung cancer in never-smokers a case-control study in a radon-prone area Galicia, Spain.	2014	The aim of the study was to assess the effect of residential radon exposure on the risk of lung cancer in never-smokers and to ascertain if environmental tobacco smoke modifies the effect of residential radon. We designed a multicentre hospital-based case-control study in a radon-prone area Galicia, Spain. All participants were never-smokers. Cases had an anatomopathologically confirmed primary l…	human	x	x	x	2
24969650	[Radon] AND [Cigarette/Tobacco]	Asthma	AO	Predictors of work-related sensitisation, allergic rhinitis and asthma in early work life.	2014	Although work-related asthma and allergies are a huge burden for society, investigation of occupational exposures in early work life using an unexposed reference group is rare. Thus, the present analyses aimed to assess the potential impact of occupational exposure and other risk factors on the prevalence of work-related sensitisation and incidence of allergic rhinitis/asthma using a population-b…	human	x	x	x	2
24748485	[Radon] AND [Cigarette/Tobacco]	Lung cancer	AO	Results of simultaneous radon and thoron measurements in 33 metropolitan areas of Canada.	2015	Radon has been identified as the second leading cause of lung cancer after tobacco smoking. 222Rn radon gas and 220Rn thoron gas are the most common isotopes of radon. In order to assess thoron contribution to indoor radon and thoron exposure, a survey of residential radon and thoron concentrations was initiated in 2012 with 4000 homes in the 33 census metropolitan areas of Canada. The survey con…	human	x	x	x	2
24742725	[Radon] AND [Cigarette/Tobacco]	Lung cancer	AO	Leisure time activities related to carcinogen exposure and lung cancer risk in never smokers. A case-control study.	2014	We aim to assess the relationship between leisure time activities related to exposure to carcinogenic substances and lung cancer risk in a hospital-based case-control study performed in never smokers. We included never smoking cases with anatomopathologically confirmed lung cancer and never smoking controls undergoing trivial surgery, at 8 Spanish hospitals. The study was conducted between Januar…	human	x	x	x	2
24672690	[Radon] AND [Cigarette/Tobacco]	Lung cancer	AO	Preoperative evaluation for lung cancer resection.	2014	During the last decades lung cancer is the leading cause of death worldwide for both sexes. Even though cigarette smoking has been proved to be the main causative factor, many other agents e.g., occupational exposure to asbestos or heavy metals, indoor exposure to radon gas radiation, particulate air pollution have been associated with its development. Recently screening programs proved to reduce…	human	x	x	x	2
24645427	[Radon] AND [Cigarette/Tobacco]	KIT; Increase, lung cancer; Lung cancer	AO	Dual home screening and tailored environmental feedback to reduce radon and secondhand smoke an exploratory study.	2014	Combined exposure to secondhand smoke SHS and radon increases lung cancer risk 10-fold. The authors assessed the feasibility and impact of a brief home screening and environmental feedback intervention to reduce radon and SHS Freedom from Radon and Smoking in the Home FRESH and measured perceived risk of lung cancer and synergistic risk perception SHS x radon. Participants N = 50 received home ra…	human	x	x	x	2
24239031	[Radon] AND [Cigarette/Tobacco]	Lung cancer	AO	Knowledge about radon and its associated risk perception in France.	2013	PURPOSE Radon exposure is a major environmental risk in health. It remains badly known by the general population. It is the second cause of lung cancer, after tobacco smoking. The aim of this cross-sectional general population survey was to describe radon exposure risk knowledge and the socioeconomic factors related to this knowledge. MATERIALS AND METHODS The Cancer Barometer survey 2010 questio…	human	x	x	x	2
23928457	[Radon] AND [Cigarette/Tobacco]	Lung cancer	AO	Radon control activities for lung cancer prevention in national comprehensive cancer control program plans, 2005-2011.	2013	INTRODUCTION Radon is the second leading cause of lung cancer among smokers and the leading cause among nonsmokers. The US Environmental Protection Agency recommends that every home be tested for radon. Comprehensive Cancer Control CCC programs develop cancer coalitions that coordinate funding and resources to focus on cancer activities that are recorded in cancer plans. Radon tests, remediation,…	human	x	x	x	2
22974775	[Radon] AND [Cigarette/Tobacco]	Lung cancer	AO	Lung cancer epidemiology, risk factors, and prevention.	2012	The greatest risk by far for developing lung cancer is cigarette smoking, but age, radon exposure, environmental pollution, occupational exposures, gender, race, and pre-existing lung disease also are important contributors. However, not all people with these risk factors develop lung cancer, and some without any known risk factor do, indicating the importance of genetic influences. Future advanc…	human	x	x	x	2
22899215	[Radon] AND [Cigarette/Tobacco]	Lung cancer	AO	Human exposure to indoor radon a survey in the region of Guarda, Portugal.	2013	Radon 222Rn is a radioactive gas, abundant in granitic areas, such as the city of Guarda at the northeast of Portugal. This gas is recognised as a carcinogenic agent, being appointed by the World Health Organization as the second leading cause of lung cancer after tobacco smoke. Therefore, the knowledge of radon concentrations inside the houses where people stay longer is important from the point…	human	x	x	x	2
22874897	[Radon] AND [Cigarette/Tobacco]	Lung cancer	AO	Canadian population risk of radon induced lung cancer a re-assessment based on the recent cross-Canada radon survey.	2012	Exposure to indoor radon has been determined to be the second leading cause of lung cancer after tobacco smoking. Canadian population risk of radon induced lung cancer was assessed in 2005 with the radon distribution characteristics determined from a radon survey carried out in the late 1970s in 19 cities. In that survey, a grab sampling method was used to measure radon levels. The observed radon…	human	x	x	x	2
22843176	[Radon] AND [Cigarette/Tobacco]	Increase, lung cancer	AO	Influences motivating smokers in a radon-affected area to quit smoking.	2014	AIMS Domestic radon gas concentrations in parts of the UK are sufficiently high to increase lung cancer risk among residents, and recent studies have confirmed that the risk of smokers developing lung cancer is significantly enhanced by the presence of radon. Despite campaigns encouraging residents of radon-affected areas RAEs to test and remediate their homes, public response to the risks posed …	human	x	x	x	2
22753285	[Radon] AND [Cigarette/Tobacco]	Lung cancer; Increase, lung cancer	AO	Epidemiology of lung tumors.	2012	Approximately one out of 500 chest radiographs shows the incidental finding of a solitary pulmonary nodule and almost one half of these pulmonary lesions are caused by a tumor. Unfortunately, only 2 to 5 of all lung tumors are of benign origin, e. g. lipoma, fibroma, hamartoma, and chondroma, and the majority are malignant neoplasms, most commonly primary lung cancer followed by metastases of ext…	human	x	x	x	2
22749110	[Radon] AND [Cigarette/Tobacco]	Lung cancer	AO	Residential radon and lung cancer incidence in a Danish cohort.	2012	High-level occupational radon exposure is an established risk factor for lung cancer. We assessed the long-term association between residential radon and lung cancer risk using a prospective Danish cohort using 57,053 persons recruited during 1993-1997. We followed each cohort member for cancer occurrence until 27 June 2006, identifying 589 lung cancer cases. We traced residential addresses from …	human	x	x	x	2
2208111	[Radon] AND [Cigarette/Tobacco]	Lung cancer	AO	Case-control study of residential radon and lung cancer among New Jersey women.	1990	To evaluate the association of indoor radon exposure with lung cancer risk, yearlong alpha track detector measurements of radon were conducted in dwellings which had been occupied for at least 10 years by 433 New Jersey female lung cancer cases and 402 controls who were subjects in a larger population-based study. Adjusted odds ratios were 1.1 90 confidence interval, 0.79-1.7, 1.3 90 confidence i…	human	x	x	x	2
21548831	[Radon] AND [Cigarette/Tobacco]	Asthma; Pneumonia	AO	Environmental risk factors in the first year of life and childhood asthma in the Central South of Chile.	2011	BACKGROUND Childhood asthma has a high prevalence in South America--a region of the world currently undergoing a thorough modernization and transition process. Asthma in South America is mainly associated with poor urban environment, which actually may challenge the role of the hygiene hypothesis. We systematically assessed the impact of environmental factors in the first year of life on asthma. …	human	x	x	x	2
21257878	[Radon] AND [Cigarette/Tobacco]	Lung cancer	AO	Epidemiology of lung cancer in women risk factors, survival, and screening.	2011	OBJECTIVE Lung cancer remains the leading cause of cancer mortality in both men and women. Tobacco use causes the vast majority of lung cancer in women but does not explain all cases, because about one in five women who develop lung cancer have never smoked. CONCLUSION Environmental exposures, genetic predisposition, hormonal factors, and viral infection may all play a role in lung cancer in wome…	human	x	x	x	2
21212062	[Radon] AND [Cigarette/Tobacco]	Lung cancer; Increase, lung cancer	AO	Radon and lung cancer in the American Cancer Society cohort.	2011	BACKGROUND Case-control studies conducted in North America, Europe, and Asia provided evidence of increased lung cancer risk due to radon in homes. Here, the association between residential radon and lung cancer mortality was examined in a large-scale cohort study. METHODS Nearly 1.2 million Cancer Prevention Study-II participants were recruited in 1982. Mean county-level residential radon concen…	human	x	x	x	2
20805318	[Radon] AND [Cigarette/Tobacco]	Lung cancer	AO	Lung cancer and environmental chemical exposure a review of our current state of knowledge with reference to the role of hormones and hormone receptors as an increased risk factor for developing lung cancer in man.	2010	Lung cancer is a dominant cause of cancer mortality. The etiology of lung cancer is mainly related to cigarette smoking, airborne genotoxic carcinogens, and arsenic, but its sex-specific incidence suggests that other mechanisms, such as hormones, may also be involved in the process of carcinogenesis. A number of agents commonly present in the living environment can have dual biological effects no…	human	x	x	x	2
20704719	[Radon] AND [Cigarette/Tobacco]	Lung cancer	AO	Quantification of ETS exposure in hospitality workers who have never smoked.	2010	BACKGROUND Environmental Tobacco Smoke ETS was classified as human carcinogen K1 by the German Research Council in 1998. According to epidemiological studies, the relative risk especially for lung cancer might be twice as high in persons who have never smoked but who are in the highest exposure category, for example hospitality workers. In order to implement these results in the German regulation…	human	x	x	x	2
2069992	[Radon] AND [Cigarette/Tobacco]	Lung cancer	AO	Epidemiology, prevention, and prognostic factors in lung cancer.	1991	Recent studies confirm that the only effective strategy for control of lung cancer is prevention, with abolition of smoking as the preliminary strategy. Lung cancer is beginning to decline in men, but is still rising in women, whose risk from cigarette smoking per amount smoked is now recognized to be similar to that of men. Passive smoke exposure increases risk in nonsmokers and probably smokers…	human	x	x	x	2
19107427	[Radon] AND [Cigarette/Tobacco]	Lung cancer	AO	Environmental and occupational risk factors for lung cancer.	2009	Lung cancer is the worlds leading cause of cancer death. It is primarily due to the inhalation of carcinogens and highly accessible to prevention by diminishing exposures to lung carcinogens. Most important will be the complete cessation of exposure to cigarette smoke first and second hand and to asbestos. Two environmental exposures--radon in homes and arsenic in drinking water--cannot be totall…	human	x	x	x	2
18990005	[Radon] AND [Cigarette/Tobacco]	Lung cancer; Increase, lung cancer	AO	Aetiology of cancer in Asia.	2008	Cancer has become the leading cause of death in many Asian countries. There is an increasing trend in breast, prostate and colon cancers, which are considered as typical of economically developed countries. Although breast and prostate cancer rates are still lower than in western countries, they are particularly rapidly increasing. In this paper, we review recently published literature to identif…	human	x	x	x	2
18409956	[Radon] AND [Cigarette/Tobacco]	Lung cancer	AO	Radon exposition preliminary research in a Sicilian territory.	2007	Radon toxicity on human body is well known from along in 1988 radon has been classified as first type carcinogen, after only to tobaccos smoke, as cause of lungs cancer. Based on known scientific data, preliminary study has been conducted by the AA. It concerns radon exposition on inhabitants living in a Sicilian territory featured by previous seismic events the territory and the town of Montevag…	human	x	x	x	2
17873159	[Radon] AND [Cigarette/Tobacco]	Lung cancer	AO	Epidemiology of lung cancer ACCP evidence-based clinical practice guidelines 2nd edition.	2007	BACKGROUND The objective of this study was to summarize the published literature concerning the epidemiology of lung cancer. METHODS A narrative review of published evidence was conducted, identifying and summarizing key reports that describe the occurrence of lung cancer in populations and factors that affect lung cancer risk. RESULTS In the United States, lung cancer remains the leading cause o…	human	x	x	x	2
17596269	[Radon] AND [Cigarette/Tobacco]	Asthma	AO	Leisure time activity and new onset of wheezing during adolescence.	2007	Asthma prevalence is increasing in adult and paediatric patients. In the present study, the association between different leisure time activities and new onset of wheezing was analysed in adolescents aged 16-18 yrs taking part in a questionnaire-based follow-up of the International Study on Asthma and Allergies in Childhood in Munich and Dresden, Germany. Of the 3,785 adolescents who took part in…	human	x	x	x	2
17426046	[Radon] AND [Cigarette/Tobacco]	Lung cancer; KIT	AO	Using radon risk to motivate smoking reduction II randomized evaluation of brief telephone counseling and a targeted video.	2008	Radon and cigarette smoking have synergistic effects on lung cancer risk. Electric utility company bill stuffers offered free radon test kits to households with at least one smoker. Participating households n = 1364 were randomized within a 2 x 2 design to evaluate the main effects of brief telephone counseling and a targeted video on smoking cessation and the establishment of new household smoki…	human	x	x	x	2
17386247	[Radon] AND [Cigarette/Tobacco]	Lung cancer	AO	Causes of lung cancer smoking, environmental tobacco smoke exposure, occupational and environmental exposures and genetic predisposition.	2007	Every year, in Spain 18,000 new cases of lung cancer LC are diagnosed. Approximately, 80-90 LC in men and women are directly attributable to tobacco abuse. Cigarette smoke contains over 300 chemicals, 40 of which are known to be potent carcinogens. In the last decade, as in Spain, prevalence of smoking in women has generally increased in the European Union. LC risk can be substantially reduced af…	human	x	x	x	2
16843042	[Radon] AND [Cigarette/Tobacco]	Lung cancer; Increase, lung cancer	AO	Human cancer from environmental pollutants the epidemiological evidence.	2006	An increased risk of mesothelioma has been reported among individuals experiencing residential exposure to asbestos, while results for lung cancer are less consistent. Several studies have reported an increased risk of lung cancer risk from outdoor air pollution on the basis of the results of the largest study, the proportion of lung cancers attributable to urban air pollution in Europe can be as…	human	x	x	x	2
16792586	[Radon] AND [Cigarette/Tobacco]	Pulmonary Disease, Chronic Obstructive; Asthma	AO	Working towards healthy air in dwellings in Europe.	2006	Poor indoor air quality has been implicated in the increase in allergic and respiratory diseases seen in industrialized countries in recent decades. Although air pollution in the workplace is well studied, much less is known about the consequences of poor air quality in homes. In an attempt to halt or slow down the increase in allergic and respiratory diseases, the European Federation of Allergy …	human	x	x	x	2
16581199	[Radon] AND [Cigarette/Tobacco]	Lung Diseases; Increase, lung cancer; Lung cancer	AO	Risk factors for lung cancer in Iowa women implications for prevention.	2006	BACKGROUND Multiple risk factors possibly associated with lung cancer were examined as part of a large-scale residential radon case-control study conducted in Iowa between 1994 and 1997. We were particularly interested in stratifying risk factors by smoking status. Relatively little risk factor information is available for Midwestern rural women. METHODS Four hundred thirteen female lung cancer c…	human	x	x	x	2
16538937	[Radon] AND [Cigarette/Tobacco]	Lung cancer; Increase, lung cancer	AO	Residential radon and lung cancer--detailed results of a collaborative analysis of individual data on 7148 persons with lung cancer and 14,208 persons without lung cancer from 13 epidemiologic studies in Europe.	2006	OBJECTIVES Studies seeking direct estimates of the lung cancer risk associated with residential radon exposure lasting several decades have been conducted in many European countries. Individually these studies have not been large enough to assess moderate risks reliably. Therefore data from all 13 European studies of residential radon and lung cancer satisfying certain prespecified criteria have …	human	x	x	x	2
16537668	[Radon] AND [Cigarette/Tobacco]	Asthma	AO	Smoking and the incidence of asthma during adolescence results of a large cohort study in Germany.	2006	BACKGROUND The association between smoking and asthma or wheeze has been extensively studied in cross sectional studies, but evidence from large prospective cohort studies on the incidence of asthma during adolescence is scarce. METHODS We report data from a cohort study in two German cities, Dresden and Munich. The study population n = 2936 was first studied in 1995/6 at age 9-11 years as part o…	human	x	x	x	2
16340837	[Radon] AND [Cigarette/Tobacco]	Lung cancer; Increase, lung cancer	AO	Lung cancer in women.	2005	BACKGROUND Since the end of the 1980s, there has been a significant increase in the incidence of lung cancer in women in France. This is largely due to an increase in women smoking since the end of the nineteen-sixties, some 20 years later than occurred in North America. STATE OF THE ART Since 1995 lung cancer has been the third most common malignant cause of death in French women having become t…	human	x	x	x	2
16238155	[Radon] AND [Cigarette/Tobacco]	Lung cancer; Increase, lung cancer	AO	Canadian individual risks of radon-induced lung cancer for different exposure profiles.	2005	BACKGROUND Indoor radon has been determined to be the second leading cause of lung cancer after tobacco smoking. There is an increasing need among radiation practitioners to have numerical values of lung cancer risks for men and women, ever-smokers and never-smokers exposed to radon in homes. This study evaluates individual risks for the Canadian population exposed to radon in homes at different …	human	x	x	x	2
15613366	[Radon] AND [Cigarette/Tobacco]	Lung cancer; Increase, lung cancer	AO	Radon in homes and risk of lung cancer collaborative analysis of individual data from 13 European case-control studies.	2005	OBJECTIVE To determine the risk of lung cancer associated with exposure at home to the radioactive disintegration products of naturally occurring radon gas. DESIGN Collaborative analysis of individual data from 13 case-control studies of residential radon and lung cancer. SETTING Nine European countries. SUBJECTS 7148 cases of lung cancer and 14,208 controls. MAIN OUTCOME MEASURES Relative risks …	human	x	x	x	2
15455588	[Radon] AND [Cigarette/Tobacco]	Lung cancer; Increase, lung cancer	AO	Lung cancer epidemiology and risk factors in Asia and Africa.	2004	In industrialised countries, lung cancer is the most common form of cancer among males and it is growing among females. For both sexes, rates reflect smoking behaviours. The pattern appears to be different in Asia, particularly in China, where lung cancer rates in men reflect high smoking rates but high rates among non-smoking women appear to be related to other factors. The incidence of lung can…	human	x	x	x	2
1532731	[Radon] AND [Cigarette/Tobacco]	Lung cancer	AO	Strategies for prevention of cancer in humans.	1992	A substantial amount of epidemiologic and laboratory data indicates that the majority of human cancers should be preventable. In this article, the biologic basis of cancer prevention is presented and the major factors contributing to the initiation, promotion, and progression of cancer in humans detailed. These include tobacco, ultraviolet and ionizing radon radiation, certain chemicals asbestos,…	human	x	x	x	2
15322513	[Radon] AND [Cigarette/Tobacco]	Lung cancer; Increase, lung cancer	AO	Epidemiology of environmental and occupational cancer.	2004	Environmental carcinogens, in a strict sense, include outdoor and indoor air pollutants, as well as soil and drinking water contaminants. An increased risk of mesothelioma has consistently been detected among individuals experiencing residential exposure to asbestos, while results for lung cancer are less consistent. Several good-quality studies have investigated lung cancer risk from outdoor air…	human	x	x	x	2
15295901	[Radon] AND [Cigarette/Tobacco]	Lung cancer; Increase, lung cancer	AO	Silicosis and smoking strongly increase lung cancer risk in silica-exposed workers.	2004	It remains controversial whether silica is a human lung carcinogen. In this study, we estimated the relative risks of lung cancer due to silica and silicosis by meta-analysis. We collected papers published from 1966-2001 which epidemiologically reported on the relationship between silica/silicosis and lung cancer. We removed papers which did not exclude the effects of asbestos and radioactive mat…	human	x	x	x	2
1497240	[Radon] AND [Cigarette/Tobacco]	Lung cancer	AO	Epidemiology of malignant tumors of the larynx and lung.	1992	Respiratory tract cancers, unlike most other cancers, have known causes and are susceptible to primary prevention. According to a large population-based case-control study in Southern Europe, over 90 of the present incidence of laryngeal cancer could be prevented by avoiding smoking and alcohol consumption. Most of the risk is attributable to tobacco, but reducing alcohol alone could still preven…	human	x	x	x	2
1480796	[Radon] AND [Cigarette/Tobacco]	Lung cancer; Increase, lung cancer	AO	Modeling the modification of the risk of radon-induced lung cancer by environmental tobacco smoke.	1992	The presence of environmental tobacco smoke ETS in homes has been implicated in the causation of lung cancer. While of interest in its own right, ETS also influences the risk imposed by radon and its decay products. The interaction between radon progeny and ETS alters the exposure, intake, uptake, biokinetics, dosimetry, and radiobiology of those progeny. The present paper details model predictio…	human	x	x	x	2
14757710	[Radon] AND [Cigarette/Tobacco]	Lung cancer; Increase, lung cancer	AO	Contribution of environmental factors to cancer risk.	2003	Environmental carcinogens, in a strict sense, include outdoor and indoor air pollutants, as well as soil and drinking water contaminants. An increased risk of mesothelioma has consistently been detected among individuals experiencing residential exposure to asbestos, whereas results for lung cancer are less consistent. At least 14 good-quality studies have investigated lung cancer risk from outdo…	human	x	x	x	2
14724778	[Radon] AND [Cigarette/Tobacco]	Lung cancer; Asthma	AO	Passive smoking--current position of science.	2004	Among all indoor pollutants, environmental tobacco smoke ETS might be the most important. In population-based studies 30 to 60 of the participants reported regular exposure to ETS. ETS has been classified as carcinogenic by several national and international agencies. In 2002, a paragraph on restriction of smoking at the workplace has been added to the German Workplaces Ordinance. International m…	human	x	x	x	2
1396465	[Radon] AND [Cigarette/Tobacco]	Lung cancer	AO	Cancer risks from arsenic in drinking water.	1992	Ingestion of arsenic, both from water supplies and medicinal preparations, is known to cause skin cancer. The evidence assessed here indicates that arsenic can also cause liver, lung, kidney, and bladder cancer and that the population cancer risks due to arsenic in U.S. water supplies may be comparable to those from environmental tobacco smoke and radon in homes. Large population studies in an ar…	human	x	x	x	2
1305974	[Radon] AND [Cigarette/Tobacco]	Lung Diseases	AO	The consequences of passive smoking an overview.	1992	Tobacco smoke contains a wide range of toxic vapors and particles that when inhaled are injurious to the smoker himself active smoking and to those around him passive smoking. It is extremely difficult to define precisely the harmful effects of passive smoking on the individuals health because of the problems involved in quantifying the extent of exposure. A number of epidemiological studies indi…	human	x	x	x	2
12872179	[Radon] AND [Cigarette/Tobacco]	Lung cancer	AO	Why are lung cancer rate trends so different in the United States and United kingdom?	2003	Over the period 1951-1995, lung cancer rates in men aged 35-74 yr more than doubled in the United States but declined slightly in the United Kingdom. In women, rates rose about sevenfold in the United States but only about threefold in the United Kingdom. To investigate whether these very different trends in lung cancer risk could be explained by smoking habits, trends in smoking were compared in…	human	x	x	x	2
12209611	[Radon] AND [Cigarette/Tobacco]	Lung Diseases; Pneumonia; Lung cancer	AO	Risk factors for lung cancer among nonsmoking women.	2002	To evaluate risk factors for lung cancer in nonsmoking women, we used data of a case-control study conducted between 1991 and 1996 in Germany. A total of 234 female histologically confirmed lung cancer patients and 535 population controls who had never smoked more than 400 cigarettes in their lifetime were personally interviewed with respect to occupation, exposure to environmental tobacco smoke …	human	x	x	x	2
12075673	[Radon] AND [Cigarette/Tobacco]	Lung cancer; Lung Diseases	AO	Residential radon exposure and lung cancer risk in nonsmokers.	2002	Lung cancer is a disease that is almost entirely caused by smoking hence, it is almost totally preventable. Yet there are a small percentage of cases, perhaps as many as 5 to 15, where there are other causes. Risk factors identified for this other group include passive smoking, occupational exposure to certain chemicals and ionizing radiation, diet, and family history of cancer. In the United Sta…	human	x	x	x	2
11901905	[Radon] AND [Cigarette/Tobacco]	Lung cancer	AO	Epidemiology, etiology, and prevention of lung cancer.	2002	Over the past century, lung cancer has gone from an obscure disease to the leading cause of cancer death worldwide. Initially an epidemic disease among men in industrialized nations, lung cancer now has become the leading cancer killer in both sexes in the United States and an increasingly common disease of both sexes in developing countries. Lung cancer incidence largely mirrors smoking prevalen…	human	x	x	x	2
11706145	[Radon] AND [Cigarette/Tobacco]	Lung cancer; Increase, lung cancer	AO	Mortality from lung cancer among silicotic patients in Sardinia an update study with 10 more years of follow up.	2001	OBJECTIVES To evaluate the association between silica, silicosis and lung cancer, the mortality of 724 patients with silicosis, first diagnosed by standard chest x ray film between 1964 and 1970, has been analysed by a cohort study extended to 31 December 1997. METHODS Smoking and detailed occupational histories were available for each member of the cohort as well as the estimated lifetime exposu…	human	x	x	x	2
11603127	[Radon] AND [Cigarette/Tobacco]	Bronchitis, Chronic	AO	Multifactorial aetiology of lung cancer among silica-exposed workers.	2001	In 1997, the International Agency for Research on Cancer IARC upgraded its evaluation of crystalline silica to a Group 1 human carcinogen. Criticism against such decision is based on the lack of consistency in experimental results across animal species, violation of an important principle for causality, such as the replication of findings under different circumstances of exposure, and the lack of…	human	x	x	x	2
11389059	[Radon] AND [Cigarette/Tobacco]	Lung cancer; K-RAS, p53	AO	p53 and K-ras mutations in lung cancers from former and never-smoking women.	2001	Somatic p53 mutations are common in lung cancer. Active cigarette smoking is positively correlated with the total frequency of p53 mutations and GC to TA transversions on the nontranscribed DNA coding strand. Mutational hotspots within the p53 gene, e.g., codon 157, have been identified for tobacco-related lung cancer, whereas these same mutations are found rarely in other cancers. Such data impl…	human	x	x	x	2
11275995	[Radon] AND [Cigarette/Tobacco]	Lung cancer	AO	Lung cancer and cigarette smoking in Europe an update of risk estimates and an assessment of inter-country heterogeneity.	2001	Ten case-control studies have been carried out in 6 European countries to investigate the major risk factors for lung cancer. Carcinogenic effect from cigarette smoke was the most relevant interest in our study, which has included 7,609 cases of lung cancer and 10,431 controls, mainly population based. The results indicate elevated odds ratios ORs 23.9 among men and 8.7 among women with attributa…	human	x	x	x	2
11224993	[Radon] AND [Cigarette/Tobacco]	Lung cancer; Increase, lung cancer	AO	The epidemiology of lung cancer.	2001	Lung cancer continues to be the leader in cancer deaths in the United States. The incidence of lung cancer in men has slowly decreased since the late 1980s, but has just now begun to plateau in women at the end of this decade. Despite modest advances in chemotherapy for treating lung cancer, it remains a deadly disease with overall 5-yr survival rates having not increased significantly over the l…	human	x	x	x	2
11139328	[Radon] AND [Cigarette/Tobacco]	Lung Diseases; Increase, lung cancer; Lung cancer	AO	Lung cancer in lifetime nonsmoking men - results of a case-control study in Germany.	2001	Epidemiological studies of lung cancer among nonsmoking men are few. This case-control study was conducted among lifetime nonsmoking men between 1990 and 1996 in Germany to examine lung cancer risk in relation to occupation, environmental tobacco smoke, residential radon, family history of cancer and previous lung disease. A total of 58 male cases with confirmed primary lung cancer and 803 male p…	human	x	x	x	2
11018397	[Radon] AND [Cigarette/Tobacco]	Lung cancer; Increase, lung cancer	AO	Lung cancer and indoor air pollution in rural china.	2000	PURPOSE Indoor air pollution has been linked with lung cancer in China. In contrast to previous studies conducted in urban areas with high levels of industrial pollution, we undertook a lung cancer case-control study in a rural area of China, where residents live in underground dwellings. We evaluated the effects of radon, wood and coal combustion, cooking oil fumes, and environmental tobacco smo…	human	x	x	x	2
10955399	[Radon] AND [Cigarette/Tobacco]	Lung cancer; Increase, lung cancer	AO	Urban air pollution and lung cancer in Stockholm.	2000	We conducted a population-based case-control study among men 40-75 years of age encompassing all cases of lung cancer 1985-1990 among stable residents of Stockholm County 1950-1990. Questionnaires to subjects or next-of-kin primarily wives or children elicited information regarding smoking and other risk factors, including occupational and residential histories. A high response rate gt85 resulted…	human	x	x	x	2
10813232	[Radon] AND [Cigarette/Tobacco]	Lung cancer; Increase, lung cancer	AO	Epidemiology of lung cancer.	1998	Lung cancer incidence is now decreasing in US men. Although rates continue to increase in women, the rate of increase is declining. Most lung cancer in men and women is attributable to cigarette smoking. Histologic patterns are consistent with smoking trends for gender, race, and age. Trends in adenocarcinoma may be related to an increase in exposure to tobacco-specific nitrosamines from low-tar …	human	x	x	x	2
7549812	[Radon] AND [Cigarette/Tobacco]	Lung cancer; Increase, Mutations; p53	AO + KE	Mutations in the p53 gene in lung cancer are associated with cigarette smoking and asbestos exposure.	1995	It has been proposed that the patterns of mutations in the p53 tumor suppressor gene will provide clues to the mechanisms of cancer occurrence. Cigarette smoking is known to be the greatest risk factor for lung cancer. Epidemiological evidence has also implicated radon and asbestos as exposures that significantly increase this disease risk asbestos exposure synergistically enhances the lung cance…	human	x	x	x	2
27597280	[Radon] AND [Cigarette/Tobacco]	EGFR; TP53; Lung cancer; KRAS	AO + KE	Somatic alterations in lung cancer Do environmental factors matter?	2016	Lung cancer is the leading cause of cancer-related death worldwide and smoking tobacco is now definitively established as the dominant risk factor for the malignancy. However, lung cancer can and does occur in never smokers, thus illustrating the existence of other risk factors. Many of these latter are environmental, such as workplace and home carcinogens, air pollution, radon and certain infect…	x	x	x	x	2
24852519	[Radon] AND [Cigarette/Tobacco]	GSTT1; Increase, lung cancer; GSTM1; Lung cancer	AO + KE	Genetic susceptibility, residential radon, and lung cancer in a radon prone area.	2014	INTRODUCTION Radon exposure has been classified as the second cause of lung cancer, after tobacco, and the first in never smokers. GSTM1 and GSTT1 genes deletion increase the risk of lung cancer. We aim to know whether the risk of lung cancer because of residential radon is modulated by these genetic polymorphisms. METHODS Hospital-based, case-control study where cases had confirmed lung cancer. …	human	x	x	x	2
23677552	[Radon] AND [Cigarette/Tobacco]	Lung cancer; EGFR	AO + KE	Gender-specific difference in lung cancer.	2013	More and more differences in lung cancer are being detected between men and women. Lung cancer, at the beginning of the last century a rare disease in women, has a growing incidence in women, in particular in young females. Lung cancer is a leading cause of cancer death in women in developed countries with different histological types and adenocarcinomas are more frequent in women than in men. Ci…	human	x	x	x	2
22523180	[Radon] AND [Cigarette/Tobacco]	Lung cancer; EGFR	AO + KE	EGFR somatic mutations in lung tumors radon exposure and passive smoking in former- and never-smoking U.S. women.	2012	BACKGROUND Patients with lung cancer with mutations in EGF receptor EGFR tyrosine kinase have improved prognosis when treated with EGFR inhibitors. We hypothesized that EGFR mutations may be related to residential radon or passive tobacco smoke. METHODS This hypothesis was investigated by analyzing EGFR mutations in 70 lung tumors from a population of never and long-term former female smokers fro…	human	x	x	x	2
22402423	[Radon] AND [Cigarette/Tobacco]	Increases reactive oxygen species; DNA damage; Lung cancer	AO + KE	Radon and lung cancer.	2012	Lung cancer is the leading cause of cancer-related deaths worldwide. Radon exposure is the second leading cause of lung cancer, following tobacco smoke. Radon is not only an independent risk factor it also increases the risk of lung cancer in smokers. Numerous cohort, case-control, and experimental studies have established the carcinogenic potential of radon. The possibility of radon having a cau…	x	x	x	x	2
19963114	[Radon] AND [Cigarette/Tobacco]	GSTT1; OGG1; CYP1A1; Oxidative stress; TP53; Increase, lung cancer; CYP2E1; MPO; GSTM1; Lung cancer	AO + KE	Effect of combined genetic polymorphisms on lung cancer risk in northern Thai women.	2009	Lung cancer is a major cause of cancer-related death in developed countries, and its incidence in developing countries is increasing. In Thailand, cancer incidences differ greatly from region to region, and lung cancer is the most common cancer in the northern Thai population. The polymorphic frequency of 10 genetic susceptibility genes and their association with lung cancer were examined in a no…	human	x	x	x	2
17897960	[Radon] AND [Cigarette/Tobacco]	Lung cancer; p53	AO + KE	Analysis of the relationship between p53 immunohistochemical expression and risk factors for lung cancer, with special emphasis on residential radon exposure.	2008	BACKGROUND Indoor radon exposure has been postulated as the second risk factor of lung cancer after tobacco. The objective of this work is to analyze if there exists any effect on p53 immunohistochemical expression mainly due to radon exposure and other risk factors for lung cancer. PATIENTS AND METHODS The tumor samples of a case series of 163 lung cancer cases were analyzed to know the p53 stai…	human	x	x	x	2
16642467	[Radon] AND [Cigarette/Tobacco]	Oxidative stress; Increase, lung cancer; Increases reactive oxygen species; ROS; GSTM1; Lung cancer	AO + KE	Radon, secondhand smoke, glutathione-S-transferase M1 and lung cancer among women.	2006	Tobacco smoke and ionizing radiation induce oxidative stress by transmitting or generating reactive oxygen species ROS. We hypothesized that glutathione-S-transferase M1 GSTM1 null homozygotes would have decreased ability to neutralize ROS that might increase their susceptibility to lung cancer. A case-only design was used with lung cancer cases pooled from 3 previously completed case-control stu…	human	x	x	x	2
9363127	[Radon] AND [Cigarette/Tobacco]	Inflammation	KE	An update on air pollution.	1996	Air pollution is associated with adverse health effects. Much of the recent literature, which is the focus of this review, has concentrated on identifying individuals at risk and on the health effects of mixed pollutants. For indoor air, new analyses continue to support the notion that the risk of residential radon exposure is low and that environmental tobacco smoke may cause respiratory symptom…	human	x	x	x	2
34682394	[Radon] AND [Cigarette/Tobacco]	KIT	KE	Use of Theory-Driven Report Back to Promote Lung Cancer Risk Reduction.	2021	Report back is active sharing of research findings with participants to prompt behavior change. Research on theory-driven report back for environmental risk reduction is limited. The study aim is to evaluate the impact of a stage-tailored report back process with participants who had high home radon and/or air nicotine levels. An observational one-group pre-post design was used, with data collect…	human	x	x	x	2
30678830	[Radon] AND [Cigarette/Tobacco]	Increase, Oxidative damage to DNA; DNA damage; p53	KE	Micronuclei frequency in peripheral blood lymphocytes and levels of anti-p53 autoantibodies in serum of residents of Kowary city regions Poland with elevated indoor concentrations of radon.	2019	INTRODUCTION Ninety four residents of Kowary city Poland have been investigated for environmental radon exposure that ranged from 0.24 WLM to 9.6 WLM activity concentration range 35-2700 Bq/m3. Kowary was chosen because of uranium mineralisation in its close vicinity. METHOD Whole population studied was divided into two groups exposed to low radon activity concentrations resulting in the exposure…	human	x	x	x	2
20716295	[Radon] AND [Cigarette/Tobacco]	Oxidative stress; Asthma; Increases reactive oxygen species; Inflammation; Increase, Oxidative stress	KE	The role of oxidative stress in the pathogenesis and treatment of asthma.	2010	The role of oxidative stress in asthma is gaining increasing scientific attention. The hallmark of asthma is airway inflammation. Oxidative stress may initiate and augment inflammation, and may also result from inflammation. Exposure to tobacco smoke, ozone, diesel exhaust, and a variety of other pollutants generates reactive oxygen species and other oxidative stressors. Some studies suggest that…	human	x	x	x	2
12619109	[Radon] AND [Cigarette/Tobacco]	TP53	KE	TP53 mutations in workers exposed to occupational carcinogens.	2003	In some cases, evidence exists that exogenous carcinogenic exposures contribute to the mutation spectrum of the TP53 gene p53 in human cancers. Although the clearest examples come from dietary and environmental sources, only a restricted number of papers have concentrated specifically on TP53 mutations in tumors from workers exposed to occupational carcinogens. In populations exposed to dietary a…	human	x	x	x	2
9408549	[Radon] AND [Cigarette/Tobacco]	Lung cancer; Bronchitis, Chronic	AO	Risk factors and early detection of lung cancer in a cohort of Chinese tin miners.	1997	PURPOSE To examine risk factors and establish a biologic specimen and data bank for the study of early markers of lung cancer. METHODS We designed a dynamic cohort using an ongoing lung cancer screening program among radon- and arsenic-exposed tin miners in Yunnan China. Through the first four years of the study, 8,346 miners aged 40 years and older with over 10 years of occupational exposure hav…	human	miner	x	x	3
8943835	[Radon] AND [Cigarette/Tobacco]	Lung cancer; Increase, lung cancer	AO	Clinical measures, smoking, radon exposure, and risk of lung cancer in uranium miners.	1996	OBJECTIVES Exposure to the radioactive daughters of radon is associated with increased risk of lung cancer in mining populations. An investigation of incidence of lung cancer following a clinical survey of Ontario uranium miners was undertaken to explore whether risk associated with radon is modified by factors including smoking, radiographic silicosis, clinical symptoms, the results of lung func…	human	miner	x	x	3
8667427	[Radon] AND [Cigarette/Tobacco]	Lung cancer	AO	Indoor radon exposure and risk of lung cancer a nested case-control study in Finland.	1996	BACKGROUND Inhaled radon has been shown to cause lung cancer among underground miners exposed to very high radon concentrations, but the results regarding the effects of residential radon have been conflicting. PURPOSE Our aim was to assess the effect of indoor radon exposure on the risk of lung cancer. METHODS To investigate this effect, a nested case-control study was conducted in Finland. The …	human	miner	x	x	3
8432644	[Radon] AND [Cigarette/Tobacco]	Lung cancer	AO	Skeletal 210Pb levels and lung cancer among radon-exposed tin miners in southern China.	1993	A preliminary case-control study of 19 lung cancer cases older than 55 y and 141 age-matched controls was carried out among a group of underground miners in Southern China who were exposed to 222Rn and its decay products. 210Pb activity levels were measured in the skull to estimate radon exposure. Radon exposure was also estimated in working level months, based on work histories and available ind…	human	miner	x	x	3
8280627	[Radon] AND [Cigarette/Tobacco]	Lung cancer; Increase, lung cancer	AO	Mortality of iron miners in Lorraine France relations between lung function and respiratory symptoms and subsequent mortality.	1993	An increased mortality from lung and stomach cancer was found in previous studies on Lorraine iron miners. A detailed analysis, however, was not possible due to the lack of data for survivors. In this study the cohort included 1178 workers selected at random from all the 5300 working miners aged between 35 and 55 at the start of the follow up period, which ranged from 1975 to 1985. Occupational e…	human	miner	x	x	3
8167258	[Radon] AND [Cigarette/Tobacco]	Lung cancer	AO	Radon exposure in residences and lung cancer among women combined analysis of three studies.	1994	Lung cancer risk in relation to indoor radon was examined in three case-control studies in Stockholm Sweden, New Jersey United States, and Shenyang Peoples Republic of China. Year-long measurements of radon gas were made in current and past homes of 966 women who developed lung cancer and of 1,158 control women, included in the combined analysis. Nearly 14 percent of the participants were estimat…	human	miner	x	x	3
7997518	[Radon] AND [Cigarette/Tobacco]	Lung cancer	AO	Cigarette use and the estimation of lung cancer attributable to radon in the United States.	1995	Residential exposure to radioactive radon and its decay products has been estimated to account for 10-12 of all lung cancer deaths in the U.S. It has been difficult to evaluate fully the impact of cigarette smoking, the most important cause of lung cancer, on this estimate, because factors for patterns of tobacco use have not been included in the risk models, since risk models are derived from st…	human	miner	x	x	3
7977411	[Radon] AND [Cigarette/Tobacco]	Lung cancer	AO	Lung cancer among tin miners in southeast China silica exposure, silicosis, and cigarette smoking.	1994	The Dachang Tin Mine is an industrial facility with high rates of lung cancer compared to the resident population in Guangxi province in southern China. Historically, exposure to silica dust was very high in the 1950s, falling in recent years to levels in keeping with international standards. Radon levels in the mine are low. We report the findings of a case-control study nested into a cohort stu…	human	miner	x	x	3
7880578	[Radon] AND [Cigarette/Tobacco]	Lung cancer	AO	Radon and health--an update.	1994	BACKGROUND The National Radiological Protection Board NRPB estimated in 1990 that radon causes 5 per cent of lung cancer in the United Kingdom. The estimate was not based on direct evidence. Since then a number of epidemiological studies have been reported. In addition, various policies have been formulated and some implemented, including the mounting of public campaigns to reduce radon in houses…	human	miner	x	x	3
7614947	[Radon] AND [Cigarette/Tobacco]	Lung cancer	AO	Modifiers of exposure-response estimates for lung cancer among miners exposed to radon progeny.	1995	The association between lung cancer and exposure to radon decay products has been well established. Despite agreement on this point, there is still some degree of uncertainty regarding characteristics of the exposure-response relationship. The use of studies of underground miners to estimate lung cancer risks due to residential radon exposure depends upon a better understanding of factors potenti…	human	miner	x	x	3
7501892	[Radon] AND [Cigarette/Tobacco]	Lung cancer	AO	Radon and cancer risk epidemiological studies after occupational or domestic exposure.	1995	The evaluation of cancer risk after exposure to radon is mainly based on the results of uranium miners follow-up. A cohort study on the French uranium miners has demonstrated an excess of lung cancer and of larynx cancer mortality. A linear dose-response relationship has been described between the excess relative risk of lung cancer and the cumulative exposure to radon poisson regression. This st…	human	miner	x	x	3
7494877	[Radon] AND [Cigarette/Tobacco]	Lung cancer	AO	Errors in exposure assessment, statistical power and the interpretation of residential radon studies.	1995	To date, epidemiological studies of risk from residential radon have not convincingly demonstrated an association with lung cancer. These case-control studies, however, have inherent limitations due to errors in estimates of exposure to indoor radon. These errors take on special significance because the level of residential risk predicted from studies of underground miners is relatively low and p…	human	miner	x	x	3
7252612	[Radon] AND [Cigarette/Tobacco]	Lung Diseases; Lung cancer	AO	Health concerns in uranium mining and milling.	1981	Mortality of uranium miners from both lung cancer and other respiratory diseases is strongly dependent on exposure to radon daughters, cigarette smoking and height. Lung cancer among 15 different mining groups uranium, iron, lead, zinc was analyzed to determine what factors influence incidence and the induction-latent period. At low exposure or exposure rates, alpha radiation is more efficient in…	human	miner	x	x	3
6577225	[Radon] AND [Cigarette/Tobacco]	Lung cancer	AO	Lung cancer mortality among U.S. uranium miners a reappraisal.	1983	This report examines lung cancer mortality among a cohort of white underground uranium miners in the Colorado plateau and is based on mortality follow-up through December 31, 1977. The analytic methods represent a miners annual age-specific lung cancer mortality rate as the unspecified rate among nonsmoking men born at the same time and with no mining history, multiplied by the relative risk fact…	human	miner	x	x	3
6322462	[Radon] AND [Cigarette/Tobacco]	Lung cancer	AO	Radiation exposure of the respiratory tract to radionuclides in the environment.	1983	Epidemiological investigations concerning lung cancer mortality of miners in radioactive underground climate have clearly resulted that the alpha-radiation of radon daughters emerging from the geological formations represent the causative factor for the accumulation of these lung cancers. The same radionuclides are also important as components of the natural radiation exposure, above all in house…	human	miner	x	x	3
3986824	[Radon] AND [Cigarette/Tobacco]	Lung cancer	AO	Enhancement of lung cancer by cigarette smoking in uranium and other miners.	1985	There are substantial animal and epidemiological data related to cigarette smoking and lung cancer among miners exposed to elevated levels of radon daughters that appears to be in disagreement. An hypothesis is advanced that explains most of this disagreement as being derived from temporal differences of cancer expression. The hypothesis is that a given radiation exposure induced a finite number …	human	miner	x	x	3
3667869	[Radon] AND [Cigarette/Tobacco]	Lung cancer	AO	Methods for analyzing occupational cohort data with application to lung cancer in U.S. uranium miners.	1987	We used two methods to examine how lung cancer death rates vary with cumulative exposures to radiation and tobacco among U.S. uranium miners. We assumed that exposures act proportionately on age-specific death rates among nonsmokers who are unexposed to uranium. The two methods produced similar results when death rate ratios were taken to be the product of radiation and tobacco effects. The estim…	human	miner	x	x	3
3570800	[Radon] AND [Cigarette/Tobacco]	Lung cancer	AO	Tests of the linear, no-threshold dose-response relationship for high-LET radiation.	1987	It is pointed out that induction of lung cancer by exposure to Rn daughters, applied at high doses to miners and at low doses to exposures in homes, provides a very stringent and sensitive test of the linear, no-threshold dose-response relationship for high-LET radiation, because this relationship predicts that a substantial fraction of lung cancer among non-smokers is due to average Rn levels. T…	human	miner	x	x	3
35206181	[Radon] AND [Cigarette/Tobacco]	Lung cancer	AO	Indoor Air Radon Concentration in Premises of Public Companies and Workplaces in Latvia.	2022	Considering the multitudes of people who spend their time working indoors in public premises and workplaces, it is worth knowing what their level of exposure is to natural radioactive radon gas, the second most widespread and dangerous carcinogen for lung cancer development after cigarette smoking. This state-level study covered most of the territory of Latvia and conducted 941 radon measurements…	human	miner	x	x	3
35093810	[Radon] AND [Cigarette/Tobacco]	Lung cancer	AO	Quantitative evaluation of radon, tobacco use and lung cancer association in an occupational cohort with 27 follow-up years.	2022	BACKGROUND Occupational radon cohorts provide important information about exposure at residential level, which are difficult to observe prospectively. However, evidence about radon-related lung cancer risks from initial exposure in childhood or interaction between radon and smoking is still limited. METHODS A total of 6017 tin miners with at least 10 years of underground radon exposure were enrol…	human	miner	x	x	3
34968429	[Radon] AND [Cigarette/Tobacco]	Lung cancer	AO	Arsenic, tobacco use, and lung cancer An occupational cohort with 27 follow-up years.	2022	BACKGROUND We explored the shape of the exposure-response relationship of arsenic-related lung cancer and the interaction between arsenic and tobacco use. METHODS A total of 3278 tin miners with at least 10 years of arsenic exposure were enrolled since 1992 and followed up for 27 years. After excluding radon-exposed miners and former smokers, 1620 miners were included into the sub-cohort. Lung ca…	human	miner	x	x	3
34634922	[Radon] AND [Cigarette/Tobacco]	Lung cancer	AO	A Mixed Methods Population Health Approach to Explore Radon-Induced Lung Cancer Risk Perception in Canada.	2021	BACKGROUND Radon is a predominant indoor air pollutant and second leading cause of lung cancer in radon-prone areas. Despite the gravity of the health risk, residents in Canada have inadequate perception and taken minimal protective actions. Better perception of a risk motivates people to take preventive measures. Scholarship about radon health risk perception is lacking in Canada. We applied a m…	human	miner	x	x	3
33911981	[Radon] AND [Cigarette/Tobacco]	Lung cancer; Lung Neoplasms	AO	Epidemiology of lung cancer.	2021	Lung cancer is the leading cause of global cancer incidence and mortality, accounting for an estimated 2 million diagnoses and 1.8 million deaths. Neoplasms of the lungs are the second most common cancer diagnosis in men and women after prostate and breast cancer, respectively. With increasing access to tobacco and industrialization in developing nations, lung cancer incidence is rising globally.…	human	miner	x	x	3
3344753	[Radon] AND [Cigarette/Tobacco]	Lung cancer	AO	Relative risk models for assessing the joint effects of multiple factors.	1988	A goal of analyses of occupational cohort data is the specification of how covariate information relates to age-specific disease risks. In describing this relationship, certain assumptions or models must be defined. For example, the usual standardized mortality ratio assumes a constant multiplicative increase in the age and calendar period disease rates of an exposed cohort over rates in a unexpo…	human	miner	x	x	3
32425519	[Radon] AND [Cigarette/Tobacco]	Pulmonary Disease, Chronic Obstructive	AO	Exposure to Residential Radon and COPD A Systematic Review.	2020	Introduction The aim of this study was to analyse the relationship between exposure to residential radon and chronic obstructive pulmonary disease COPD by means of a systematic review. Material and Methods A search was conducted in PubMed and OVID for papers making reference to the radon-COPD relationship. No search filters were applied, whether by date of publication, study type or sample size. …	human	miner	x	x	3
32344675	[Radon] AND [Cigarette/Tobacco]	Lung cancer; Increase, lung cancer	AO	Residential Radon Exposure and Cigarette Smoking in Association with Lung Cancer A Matched Case-Control Study in Korea.	2020	Residential radon exposure and cigarette smoking are the two most important risk factors for lung cancer. The combined effects thereof were evaluated in a multi-center matched case-control study in South Korea. A total of 1038 participants were included, comprising 519 non-small cell lung cancer cases and 519 age- and sex- matched community-based controls. Residential radon levels were measured f…	human	miner	x	x	3
32005674	[Radon] AND [Cigarette/Tobacco]	Lung Diseases; Lung cancer	AO	PUMA - pooled uranium miners analysis cohort profile.	2020	OBJECTIVES Epidemiological studies of underground miners have provided clear evidence that inhalation of radon decay products causes lung cancer. Moreover, these studies have served as a quantitative basis for estimation of radon-associated excess lung cancer risk. However, questions remain regarding the effects of exposure to the low levels of radon decay products typically encountered in contem…	human	miner	x	x	3
3195567	[Radon] AND [Cigarette/Tobacco]	Lung cancer	AO	Cancer mortality among a group of fluorspar miners exposed to radon progeny.	1988	A cohort study of the mortality experience 1950-1984 of 1,772 Newfoundland underground fluorspar miners occupationally exposed to high levels of radon daughters mean dose = 382.8 working levels months has been conducted. Observed numbers of cancers of the lung, salivary gland, and buccal cavity and pharynx were significantly elevated among these miners. A highly significant relation was noted bet…	human	miner	x	x	3
31250572	[Radon] AND [Cigarette/Tobacco]	Lung Diseases; Lung cancer	AO	Health Effects of Radon Exposure.	2019	Radon is a naturally occurring radioactive material that is formed as the decay product of uranium and thorium, and is estimated to contribute to approximately half of the average annual natural background radiation. When inhaled, it damages the lungs during radioactive decay and affects the human body. Through many epidemiological studies regarding occupational exposure among miners and resident…	human	miner	x	x	3
30737558	[Radon] AND [Cigarette/Tobacco]	Lung cancer; Increase, lung cancer	AO	Low radon exposures and lung cancer risk joint analysis of the Czech, French, and Beaverlodge cohorts of uranium miners.	2019	It is well established that high radon exposures increase the risk of lung cancer mortality. The effects of low occupational exposures and the factors that confound and modify this risk are not clear and are needed to inform current radiation protection of miners. The risk of lung cancer mortality at low radon exposures lt 100 working-level months was assessed in the joint cohort analysis of Czec…	human	miner	x	x	3
29986540	[Radon] AND [Cigarette/Tobacco]	Lung cancer	AO	A Cost-Effective IoT System for Monitoring Indoor Radon Gas Concentration.	2018	Radon is a noble gas originating from the radioactive decay chain of uranium or thorium. Most radon emanates naturally from the soil and from some building materials, so it can be found in many places around the world, in particular in regions with soils containing granite or slate. It is almost impossible for a person to detect radon gas without proper tools, since it is invisible, odorless, tas…	human	miner	x	x	3
28437651	[Radon] AND [Cigarette/Tobacco]	Lung cancer	AO	Population attributable risk associated with lung cancer induced by residential radon in Canada Sensitivity to relative risk model and radon probability density function choices In memory of Professor Jan M. Zielinski.	2017	Indoor radon has been identified as the second leading cause of lung cancer after tobacco smoking. The Population Attributable Risk PAR estimates the proportion of lung cancer cases associated with indoor radon exposure. Different relative risk RR models have been used in the literature to calculate PAR. The aim of this study is to assess how sensitive PAR is to the relative risk model and radon …	human	miner	x	x	3
2746814	[Radon] AND [Cigarette/Tobacco]	Lung cancer	AO	Lung cancer mortality among nonsmoking uranium miners exposed to radon daughters.	1989	Radon daughters, both in the workplace and in the household, are a continuing cause for concern because of the well-documented association between exposure to radon daughters and lung cancer. To estimate the risk of lung cancer mortality among nonsmokers exposed to varying levels of radon daughters, 516 white men who never smoked cigarettes, pipes, or cigars were selected from the US Public Healt…	human	miner	x	x	3
27198876	[Radon] AND [Cigarette/Tobacco]	Lung cancer	AO	Modeling Lung Carcinogenesis in Radon-Exposed Miner Cohorts Accounting for Missing Information on Smoking.	2016	Epidemiological miner cohort data used to estimate lung cancer risks related to occupational radon exposure often lack cohort-wide information on exposure to tobacco smoke, a potential confounder and important effect modifier. We have developed a method to project data on smoking habits from a case-control study onto an entire cohort by means of a Monte Carlo resampling technique. As a proof of p…	human	miner	x	x	3
27019716	[Radon] AND [Cigarette/Tobacco]	Lung cancer; Increase, lung cancer	AO	Indoor radon exposure and lung cancer a review of ecological studies.	2016	Lung cancer has high mortality and incidence rates. The leading causes of lung cancer are smoking and radon exposure. Indeed, the World Health Organization WHO has categorized radon as a carcinogenic substance causing lung cancer. Radon is a natural, radioactive substance it is an inert gas that mainly exists in soil or rock. The gas decays into radioactive particles called radon progeny that can…	human	miner	x	x	3
2611163	[Radon] AND [Cigarette/Tobacco]	Lung cancer	AO	Relation of arsenic exposure to lung cancer among tin miners in Yunnan Province, China.	1989	The relation of mining and smelting exposure to arsenic and lung cancer was studied among tin miners in Yunnan Province in the Peoples Republic of China. Interviews were conducted in 1985 with 107 living tin miners who had lung cancer and an equal number of age matched controls from among tin miners without lung cancer to obtain information on risk factors for lung cancer including detailed histo…	human	miner	x	x	3
2589328	[Radon] AND [Cigarette/Tobacco]	Lung cancer; Increase, lung cancer	AO	Relation of radon exposure and tobacco use to lung cancer among tin miners in Yunnan Province, China.	1989	We studied the relation of radon exposure and tobacco use to lung cancer among tin miners in Yunnan Province in the Peoples Republic of China. Interviews were conducted in 1985 with 107 living tin miners with lung cancer and an equal number of age-matched controls from among tin miners without lung cancer to obtain information on lung cancer risk factors including a detailed history of employment…	human	miner	x	x	3
2538407	[Radon] AND [Cigarette/Tobacco]	Lung cancer; Increase, lung cancer	AO	Radon progeny exposure and lung cancer risk in New Mexico U miners a case-control study.	1989	A case-control study was conducted to describe lung cancer risk in a cohort of New Mexico underground U miners. The subjects included 65 cases and 230 age-matched controls, most with exposures below 3.50 J h m-3 1000 WLM. The risk for lung cancer was increased for all cumulative exposures to Rn progeny of 0.35 J h m-3 100 WLM or greater. The odds ratios were unchanged with control for cigarette s…	human	miner	x	x	3
2403687	[Radon] AND [Cigarette/Tobacco]	Lung cancer	AO	Indoor air radon.	1990	This review concerns primarily the health effects that result from indoor air exposure to radon gas and its progeny. Radon enters homes mainly from the soil through cracks in the foundation and other holes to the geologic deposits beneath these structures. Once inside the home the gas decays half-life 3.8 d and the ionized atoms adsorb to dust particles and are inhaled. These particles lodge in t…	human	miner	x	x	3
2401265	[Radon] AND [Cigarette/Tobacco]	Lung cancer	AO	Shelter and indoor air in the twenty-first century--radon, smoking, and lung cancer risks.	1990	Recognition that radon and its daughter products may accumulate to high levels in homes and in the workplace has led to concern about the potential lung cancer risk resulting from indoor domestic exposure. While such risks can be estimated with current dosimetric and epidemiological models for excess relative risks, it must be recognized that these models are based on data from occupational expos…	human	miner	x	x	3
23698696	[Radon] AND [Cigarette/Tobacco]	Lung cancer	AO	Canadian lung cancer relative risk from radon exposure for short periods in childhood compared to a lifetime.	2013	Long-term exposure to elevated indoor radon concentrations has been determined to be the second leading cause of lung cancer in adults after tobacco smoking. With the establishment of a National Radon Program in Canada in 2007 thousands of homes across the country have been tested for radon. Although the vast majority of people are exposed to low or moderate radon concentrations from time to time…	human	miner	x	x	3
23601298	[Radon] AND [Cigarette/Tobacco]	Lung cancer; Increase, lung cancer	AO	A cohort study on risk factors of lung cancer in Yunnan tin miners.	2013	BACKGROUND Smoking is a major cause of lung cancer. Studies of lung cancer among miners have shown that occupational exposure also played an important role. The aim of this study is to investigate radon, cigarette use and other risk factors of lung cancer in Yunnan tin miners and to provide a scientific basis for the prevention and control of occupational lung cancer. METHODS A prospective cohort…	human	miner	x	x	3
2358363	[Radon] AND [Cigarette/Tobacco]	Lung cancer; Increase, lung cancer	AO	Radon and lung cancer the BEIR IV Report.	1990	The National Academy of Sciences BEIR IV Report 1988 deals primarily with lung cancer risks in human populations exposed to internally deposited alpha-emitting Rn and its decay products. Quantitative risk estimates for lung cancer are derived from analyses of epidemiologic data. A modified excess relative risk model of lung cancer mortality of worker exposure to Rn progeny in underground miners i…	human	miner	x	x	3
2328225	[Radon] AND [Cigarette/Tobacco]	Lung Diseases; Increase, lung cancer; Lung cancer	AO	Mortality experience of haematite mine workers in China.	1990	The mortality risk of iron ore haematite miners between 1970 and 1982 was investigated in a retrospective cohort study of workers from two mines, Longyan and Taochong, in China. The cohort was limited to men and consisted of 5406 underground miners and 1038 unexposed surface workers. Among the 490 underground miners who died, 205 42 died of silicosis and silicotuberculosis and 98 20 of cancer, in…	human	miner	x	x	3
23089036	[Radon] AND [Cigarette/Tobacco]	Lung cancer	AO	Risk of lung cancer from radon exposure contribution of recently published studies of uranium miners.	2012	The International Commission on Radiological Protection ICRP recently estimated the risk of lung cancer associated with radon exposure, and a statement was issued in ICRP Publication 115. This was based on recent epidemiological studies and the results from a joint analysis of cohorts of Czech, French, and German uranium miners, and indicated that the excess relative risk of lung cancer per unit …	human	miner	x	x	3
2293552	[Radon] AND [Cigarette/Tobacco]	Lung Diseases; Increase, lung cancer; Lung cancer	AO	Quantitative evaluation of the radon and lung cancer association in a case control study of Chinese tin miners.	1990	Studies of underground miners have consistently shown an increased risk of lung cancer with cumulative exposure to radon-222 and its decay products. Although the deleterious effects of high radon exposure are clear, questions regarding the shape of the exposure-response relationship, and the effects of time factors such as attained age, time since exposure and early age at first exposure, the eff…	human	miner	x	x	3
22882894	[Radon] AND [Cigarette/Tobacco]	Lung Diseases; Lung cancer	AO	Chapter 6 Lung cancer in never smokers epidemiology and risk prediction models.	2012	In this chapter we review the epidemiology of lung cancer incidence and mortality among never smokers/nonsmokers and describe the never smoker lung cancer risk models used by the Cancer Intervention and Surveillance Network CISNET modelers. Our review focuses on those influences likely to have measurable population impact on never smoker risk, such as secondhand smoke, even though the individual-…	human	miner	x	x	3
2258280	[Radon] AND [Cigarette/Tobacco]	Lung cancer	AO	Simulation model of lung cancer incidence related to smoking and radon daughter exposure.	1990	In recent years, the residential exposure to radon daughters has become a cause for concern as a contributing factor for lung cancer. In order to evaluate the populations risk consequences of different interpretations of the results of epidemiological studies in cohorts of uranium miners, a simulation model has been formulated. In the model, a defined population is generated as a set of individua…	human	miner	x	x	3
22067552	[Radon] AND [Cigarette/Tobacco]	Lung cancer; Increase, lung cancer	AO	A case-referent study of lung cancer and incense smoke, smoking, and residential radon in Chinese men.	2011	BACKGROUND Burning incense generates large amounts of air pollutants, many of which are confirmed or suspected human lung carcinogens. OBJECTIVES We conducted a population-based case-referent study to examine the effect of incense smoke exposure on lung cancer risk among Chinese males and explored the joint effect of cigarette smoking and exposure to residential radon. METHODS We recruited 1,208 …	human	miner	x	x	3
21320395	[Radon] AND [Cigarette/Tobacco]	Lung cancer; Pulmonary Disease, Chronic Obstructive; Bronchitis, Chronic	AO	Establishment of cohort to study lung cancer in Yunnan tin miners.	2002	BACKGROUND To establish a cohort for the study of risk factors of lung cancer, and to support the study of early biomarkers and prevention of lung cancer. METHODS Designed a special population-based prospectively dynamic cohort among radon- and arsenic-exposed tin miners aged 40 or more years old with at least 10 years of occupational exposure in Yunnan Province, P.R.China. The mass screenings wi…	human	miner	x	x	3
20954862	[Radon] AND [Cigarette/Tobacco]	Lung cancer; Increase, lung cancer	AO	Cancer incidence and mortality in populations living near uranium milling and mining operations in grants, New Mexico, 1950-2004.	2010	In a previous cohort study of workers engaged in uranium milling and mining activities near Grants, Cibola County, New Mexico, we found lung cancer mortality to be significantly increased among underground miners. Uranium mining took place from early in the 1950s to 1990, and the Grants Uranium Mill operated from 1958-1990. The present study evaluates cancer mortality during 1950-2004 and cancer …	human	miner	x	x	3
2069713	[Radon] AND [Cigarette/Tobacco]	Lung cancer	AO	Evaluation of the evidence that tobacco-specific nitrosamines TSNA cause cancer in humans.	1991	Considerable evidence exists that TSNA may cause cancer in humans. Strong evidence suggests that the NNN and NNK in snuff are at least partially responsible for the excess of oral cancer among snuff dippers. Tobacco smoke, because it is a combustion product, is a far more complex matrix than is smokeless tobacco. Nonetheless, NNK is well established as a lung carcinogen in laboratory animals at l…	human	miner	x	x	3
20482770	[Radon] AND [Cigarette/Tobacco]	Lung cancer	AO	Attributable mortality to radon exposure in Galicia, Spain. Is it necessary to act in the face of this health problem?	2010	BACKGROUND Radon is the second risk factor for lung cancer after tobacco consumption and therefore it is necessary to know the burden of disease due to its exposure. The objective of this study is to estimate radon-attributable lung cancer mortality in Galicia, a high emission area located at the Northwest Spain. METHODS A prevalence-based attribution method was applied. Prevalence of tobacco use…	human	miner	x	x	3
20386676	[Radon] AND [Cigarette/Tobacco]	Lung cancer	AO	Radon in indoor spaces an underestimated risk factor for lung cancer in environmental medicine.	2010	BACKGROUND Occupational medicine has long recognized radon to be a cause of lung cancer, especially among miners working under ground. Until recently, however, little scientific evidence was available about the risk to the general population caused by indoor radon. METHODS The authors analyzed literature that they found by a selective search in the light of the recently published S1 guideline of …	human	miner	x	x	3
2012447	[Radon] AND [Cigarette/Tobacco]	Lung cancer; Increase, lung cancer	AO	Health effects of radon exposure. Report of the Council on Scientific Affairs, American Medical Association.	1991	The consensus of scientists is that exposure to radon is hazardous, but disagreement exists about the effects of lower radon concentrations. Studies of underground miners have indicated that the risk of lung cancer increases in proportion to the intensity and duration of exposure to radon, and a recent authoritative report BEIR IV has concluded that estimates based on those studies are appropriat…	human	miner	x	x	3
2006898	[Radon] AND [Cigarette/Tobacco]	Lung cancer	AO	Silicosis and lung cancer in U.S. metal miners.	1991	The association between silicosis and lung cancer mortality was estimated in 9,912 369 silicotics and 9,543 nonsilicotics white male metal miners. These miners were examined by the U.S. Public Health Service during 1959-1961 and were followed through 1975. Miners were excluded from this study if they were employed in a mine during 1959-1961 that used diesel equipment underground. The ores that we…	human	miner	x	x	3
2001944	[Radon] AND [Cigarette/Tobacco]	Lung cancer	AO	Radon exposure, cigarette smoking, and other mining experience in the beaverlodge uranium miners cohort.	1991	A nested case-control study within the Beaverlodge Uranium Miners Cohort was undertaken to assess any possible contribution of confounding by smoking and other mining experience to the risk estimate derived from the original cohort study. Next of kin have been interviewed for 46 lung cancer cases and 95 controls enrolled in the Beaverlodge Uranium Miners Cohort Study who died between 1950 and 198…	human	miner	x	x	3
19925375	[Radon] AND [Cigarette/Tobacco]	Lung cancer	AO	Occupation and cancer - follow-up of 15 million people in five Nordic countries.	2009	We present up to 45 years of cancer incidence data by occupational category for the Nordic populations. The study covers the 15 million people aged 30-64 years in the 1960, 1970, 1980/1981 and/or 1990 censuses in Denmark, Finland, Iceland, Norway and Sweden, and the 2.8 million incident cancer cases diagnosed in these people in a follow-up until about 2005. The study was undertaken as a cohort st…	human	miner	x	x	3
19901596	[Radon] AND [Cigarette/Tobacco]	Lung cancer	AO	Multifactorial study of the risk of lung cancer among French uranium miners radon, smoking and silicosis.	2009	This case-control study nested in the French cohort of uranium miners provides an opportunity to take account of silicosis and smoking in the assessment of the relation between radon and lung cancer. The study includes 100 miners who died of lung cancer and 500 matched controls born within the same period of birth and of the same age at the time of death of the matching case. Data on radon exposu…	human	miner	x	x	3
19330110	[Radon] AND [Cigarette/Tobacco]	Lung cancer; Increase, lung cancer	AO	Health Effects of High Radon Environments in Central Europe Another Test for the LNT Hypothesis?	2003	Among the various "natural laboratories" of high natural or technical enhanced natural radiation environments in the world such as Kerala India, Brazil, Ramsar Iran, etc., the areas in and around the Central European Ore Mountains Erzgebirge in the southern parts of former East Germany, but also including parts of Thuringia, northern Bohemia now Czech Republic, and northeastern Bavaria, are still…	human	miner	x	x	3
19205985	[Radon] AND [Cigarette/Tobacco]	Lung cancer	AO	Health effects of radon a review of the literature.	2009	PURPOSE Radon is natural radioactive noble gas that can be found in soil, water, outdoor and indoor air. Exposure to radon accounts for more that 50 of the annual effective dose of natural radioactivity. The purpose of the current review is to summarize recent literature and evaluate the weight of evidence on the adverse health effects of radon. CONCLUSIONS Radon is an established human lung carc…	human	miner	x	x	3
19129153	[Radon] AND [Cigarette/Tobacco]	Lung cancer	AO	Lung cancer deaths from indoor radon and the cost effectiveness and potential of policies to reduce them.	2009	OBJECTIVE To determine the number of deaths from lung cancer related to radon in the home and to explore the cost effectiveness of alternative policies to control indoor radon and their potential to reduce lung cancer mortality. DESIGN Cost effectiveness analysis. SETTING United Kingdom. DATA SOURCES Epidemiological data on risks from indoor radon and from smoking, vital statistics on deaths from…	human	miner	x	x	3
1873448	[Radon] AND [Cigarette/Tobacco]	Lung cancer	AO	Feasibility of conducting a lung-cancer chemoprevention trial among tin miners in Yunnan, P. R. China.	1991	Tin miners in Yunnan Province in southern China have an extremely high rate of lung cancer, more than one percent per year among those at high risk 40 years old, with 10 years of underground mining and/or smelting experience. The extraordinary lung cancer rates result from combined exposure to radon, arsenic, and tobacco smoking cigarettes and/or bamboo water pipe. A study to determine the feasib…	human	miner	x	x	3
18714128	[Radon] AND [Cigarette/Tobacco]	Lung cancer	AO	A cohort study of uranium millers and miners of Grants, New Mexico, 1979-2005.	2008	A cohort mortality study of workers engaged in uranium milling and mining activities near Grants, New Mexico, during the period from 1955 to 1990 was conducted. Vital status was determined through 2005 and standardised mortality ratio SMR analyses were conducted for 2745 men and women alive after 1978 who were employed for at least six months. Overall, mortality from all causes SMR 1.15 95 CI 1.0…	human	miner	x	x	3
17768330	[Radon] AND [Cigarette/Tobacco]	Lung cancer; Increase, lung cancer	AO	Mortality among residents of Uravan, Colorado who lived near a uranium mill, 1936-84.	2007	A cohort mortality study was conducted of all adult residents who ever lived in Uravan, Colorado, a company town built around a uranium mill. Vital status was determined through 2004 and standardised mortality analyses conducted for 1905 men and women alive after 1978 who lived for at least 6 months between 1936 and 1984 in Uravan. Overall, mortality from all causes standardised mortality ratio S…	human	miner	x	x	3
17523851	[Radon] AND [Cigarette/Tobacco]	Lung cancer	AO	Cancer and noncancer mortality in populations living near uranium and vanadium mining and milling operations in Montrose County, Colorado, 1950-2000.	2007	Mining and milling of uranium in Montrose County on the Western Slope of Colorado began in the early 1900s and continued until the early 1980s. To evaluate the possible impact of these activities on the health of communities living on the Colorado Plateau, mortality rates between 1950 and 2000 among Montrose County residents were compared to rates among residents in five similar counties in Color…	human	miner	x	x	3
17220717	[Radon] AND [Cigarette/Tobacco]	Lung cancer	AO	Radon and lung cancer risk an extension of the mortality follow-up of the Newfoundland fluorspar cohort.	2007	Radon is a well-recognized cause of lung cancer, and studies of underground miners have provided invaluable insights on the mechanisms of radon carcinogenesis. Given the dramatic decreases in occupational exposures and the latent interval between the time of exposure and the development of lung cancer, continued follow-up of these cohorts is needed to address uncertainties in risk estimates. Here…	human	miner	x	x	3
16966089	[Radon] AND [Cigarette/Tobacco]	Lung cancer	AO	Lung cancer attributable to indoor radon exposure in france impact of the risk models and uncertainty analysis.	2006	OBJECTIVE The inhalation of radon, a well-established human carcinogen, is the principal-and omnipresent-source of radioactivity exposure for the general population of most countries. Scientists have thus sought to assess the lung cancer risk associated with indoor radon. Our aim here is to assess this risk in France, using all available epidemiologic results and performing an uncertainty analysi…	human	miner	x	x	3
16608836	[Radon] AND [Cigarette/Tobacco]	Lung cancer; Increase, lung cancer	AO	Assessment and management of residential radon health risks a report from the health Canada radon workshop.	2006	Epidemiologic studies of uranium miners and other underground miners have consistently shown miners exposed to high levels of radon to be at increased risk of lung cancer. More recently, concern has arisen about lung cancer risks among people exposed to lower levels of radon in homes. The current Canadian guideline for residential radon exposure was set in 1988 at 800 Bq/m3. Because of the accumu…	human	miner	x	x	3
16608829	[Radon] AND [Cigarette/Tobacco]	Lung cancer	AO	An overview of the North American residential radon and lung cancer case-control studies.	2006	Lung cancer has held the distinction as the most common cancer type worldwide since 1985 Parkin et al., 1993. Recent estimates suggest that lung cancer accounted for 1.2 million deaths worldwide in 2002, which represents 17.6 of the global cancer deaths Parkin et al., 2005. During 2002, the highest lung cancer rates for men worldwide reportedly occurred in North America and Eastern Europe, wherea…	human	miner	x	x	3
15703527	[Radon] AND [Cigarette/Tobacco]	Lung cancer; Increase, lung cancer	AO	Residential radon and risk of lung cancer a combined analysis of 7 North American case-control studies.	2005	BACKGROUND Underground miners exposed to high levels of radon have an excess risk of lung cancer. Residential exposure to radon is at much lower levels, and the risk of lung cancer with residential exposure is less clear. We conducted a systematic analysis of pooled data from all North American residential radon studies. METHODS The pooling project included original data from 7 North American cas…	human	miner	x	x	3
15551786	[Radon] AND [Cigarette/Tobacco]	Lung cancer	AO	Latency and the lung cancer epidemic among United States uranium miners.	2004	The latency of occupational cancer was a key factor in the recent epidemic of lung cancer among U.S. uranium miners. A review of the epidemic and analysis of latency periods with a near lifetime follow-up found that among former and nonsmokers, the mean mid-induction latent period is nearly a constant at about 25 y, regardless of age at starting or magnitude of exposure. Among cigarette smokers, …	human	miner	x	x	3
15475720	[Radon] AND [Cigarette/Tobacco]	Lung cancer	AO	Indoor radon and lung cancer in France.	2004	BACKGROUND Several case-control studies have indicated an increased risk of lung cancer linked to indoor radon exposure others have not supported this hypothesis, partly because of a lack of statistical power. As part of a large European project, a hospital-based case-control study was carried out in 4 areas in France with relatively high radon levels. METHODS Radon concentrations were measured i…	human	miner	x	x	3
15194924	[Radon] AND [Cigarette/Tobacco]	Lung cancer	AO	The U.S. Environmental Protection Agencys assessment of risks from indoor radon.	2004	The U.S. Environmental Protection Agency has updated its assessment of health risks from indoor radon, which has been determined to be the second leading cause of lung cancer after cigarette smoking. This risk assessment is based primarily on results from a recent study of radon health effects BEIR VI by the National Academy of Sciences. In BEIR VI, the National Academy of Sciences fit empirical …	human	miner	x	x	3
15138395	[Radon] AND [Cigarette/Tobacco]	Lung cancer	AO	Indoor radon exposure and lung cancer risk a review of case-control studies.	2004	BACKGROUND Radon is a radioactive gas that tends to accumulate in indoor environment. A causal relationship between lung cancer and radon exposure has been demonstrated in epidemiologic studies of miners. The objective of this paper is to present the results of case-control studies of lung cancer risk associated with indoor radon exposure. METHODS Case-control studies published since 1990 are inc…	human	miner	x	x	3
14582271	[Radon] AND [Cigarette/Tobacco]	Lung cancer; Increase, lung cancer	AO	Silica, silicosis, and lung cancer analysis if the literature and mortality studies of minor workers in Sardinia.	2003	Starting from a short review of the recent epidemiological studies available in the international literature concerning the association between silica, silicosis and lung cancer, the results of two mortality studies performed in Sardinia are reported. The first study concerns a 20-year follow-up of 1741 miners employed in 1973 in two metalliferous Sardinian mines. In the second study the cause sp…	human	miner	x	x	3
14579888	[Radon] AND [Cigarette/Tobacco]	Lung cancer	AO	Health effects of residential radon a European perspective at the end of 2002.	2003	Surveys of indoor radon concentrations, when taken together with estimates of the risk of lung cancer from studies in miners of uranium and other hard rocks, suggest that residential radon is responsible for many thousands of deaths from lung cancer each year in Europe. The vast majority of these deaths are likely to occur in individuals who also smoke cigarettes. Because of the skewed nature of …	human	miner	x	x	3
1313281	[Radon] AND [Cigarette/Tobacco]	Lung cancer	AO	A nested case-control study of lung cancer among silica exposed workers in China.	1992	In an attempt to assess whether silica induces lung cancer, a nested case-control study of 316 male lung cancer cases and 1352 controls was carried out among pottery workers and tungsten, copper-iron, and tin miners from five provinces in south central China. Exposure to dust and silica for each study subject was evaluated quantitatively by cumulative exposure measures based on historical industr…	human	miner	x	x	3
12226002	[Radon] AND [Cigarette/Tobacco]	Lung cancer; Increase, lung cancer	AO	Exposure to residential radon and lung cancer in Spain a population-based case-control study.	2002	Although high radon concentrations have been linked to increased risk of lung cancer by both experimental studies and investigations of underground miners, epidemiologic studies of residential radon exposure display inconsistencies. The authors therefore decided to conduct a population-based case-control study in northwest Spain to determine the risk of lung cancer associated with exposure to res…	human	miner	x	x	3
11869470	[Radon] AND [Cigarette/Tobacco]	Lung cancer	AO	Comparisons of lung tumour mortality risk in the Japanese A-bomb survivors and in the Colorado Plateau uranium miners support for the ICRP lung model.	2002	PURPOSES To estimate the ratio of risks for exposure to radon progeny relative to low-LET radiation based on human lung cancer data, taking account of possible time and age variations in radiation-induced lung cancer risk. MATERIALS AND METHODS Fitting two sorts of time- and age-adjusted relative risk models to a case-control dataset nested within the Colorado Plateau uranium miner cohort and to …	human	miner	x	x	3
11850554	[Radon] AND [Cigarette/Tobacco]	Lung cancer; Increase, lung cancer	AO	Nested case-control study of lung cancer in four Chinese tin mines.	2002	OBJECTIVES To evaluate the relation between occupational dust exposure and lung cancer in tin mines. This is an update of a previous study of miners with high exposure to dust at four tin mines in southern China. METHODS A nested case-control study of 130 male lung cancer cases and 627 controls was initiated from a cohort study of 7855 subjects employed at least 1 year between 1972 and 1974 in fo…	human	miner	x	x	3
11765906	[Radon] AND [Cigarette/Tobacco]	Lung cancer	AO	A review of residential radon case-control epidemiologic studies performed in the United States.	2001	Lung cancer is the leading cause of cancer death in the United States for both men and women. Although most lung cancer deaths are attributable to tobacco usage, even secondary causes of lung cancer are important because of the magnitude of lung cancer incidence and its poor survival rate. This review summarizes the basic features and major findings from the published U.S. large-scale residential…	human	miner	x	x	3
11357706	[Radon] AND [Cigarette/Tobacco]	Lung cancer	AO	Calculation of the 1995 lung cancer incidence in The Netherlands and Sweden caused by smoking and radon risk implications for radon.	2001	A two-mutation carcinogenesis model was used to calculate the expected lung cancer incidence caused by both smoking and exposure to radon in two populations, i.e. those of the Netherlands and Sweden. The model parameters were taken from a previous analysis of lung cancer in smokers and uranium miners and the model was applied to the two populations taking into account the smoking habits and expos…	human	miner	x	x	3
11217501	[Radon] AND [Cigarette/Tobacco]	Lung cancer	AO	Radon and domestic exposure.	2000	Radon is a noble gas derived from the decay of radium, which itself is a decay product of uranium. The decay products of radon can collect electrostatically on dust particles in the air and, if these particles are inhaled and attach to bronchial epithelium, produce a high local radiation dose. Alpha particles can induce DNA double-strand breaks and the development of cancer. A causal relation bet…	human	miner	x	x	3
10906000	[Radon] AND [Cigarette/Tobacco]	Lung cancer; Increase, lung cancer	AO	Serum carotenoids are associated with increased lung cancer risk among alcohol drinkers, but not among non-drinkers in a cohort of tin miners.	2000	To examine the association between pre-diagnostic serum carotenoid levels and lung cancer risk and the effects of alcohol intake on the carotenoid-lung cancer relationship, we conducted a case-control study in an occupational cohort from the Yunnan Tin Corporation in China. During 6 years of follow-up, 339 cases of confirmed lung cancer were diagnosed. Among these cases, those who donated pre-dia…	human	miner	x	x	3
10484124	[Radon] AND [Cigarette/Tobacco]	Lung cancer	AO	Radon testing in households with a residential smoker--United States, 1993-1994.	1999	Epidemiologic investigations of underground miners and studies of alpha particle carcinogenesis among laboratory animals suggest that exposure to the radioactive decay products progeny of radon is an important risk factor for lung cancer. Persons who smoke cigarettes and are exposed to these radon progeny have a substantially greater risk for developing malignancy than nonsmokers. Residential rad…	human	miner	x	x	3
7990157	[Radon] AND [Cigarette/Tobacco]	Lung cancer; Increase, lung cancer	AO	Residential radon exposure and lung cancer among nonsmoking women.	1994	BACKGROUND Radon at sufficiently high concentrations is known to cause lung cancer among underground miners and in experimental laboratory animals. PURPOSE Our aim was to determine whether indoor levels of radon are associated with a detectable increase in lung cancer. Nonsmoking women were selected because they offer the best opportunity to detect radon-related risk while minimizing the potentia…	human	miner	x	x	3
9719670	[Radon] AND [Cigarette/Tobacco]	Lung cancer	AO	Carcinogenic and cocarcinogenic effects of radon and radon daughters in rats.	1994	It has been previously established that lung cancer could be induced in rats by exposure to radon and radon daughters. Although the oat-cell carcinomas that are common in humans were not found in rats, other histological types of lung carcinomas, especially squamous cell carcinomas and primitive lung adenocarcinomas, were similar to those observed in humans. A dose-effect relationship was establi…	human	miner	animals	cell	4
9367062	[Radon] AND [Cigarette/Tobacco]	Lung cancer	AO	A case-cohort study of an early biomarker of lung cancer in a screening cohort of Yunnan tin miners in China.	1997	We initiated the present study to evaluate the accuracy of a new epithelial biomarker of early lung cancer. We tested the hypothesis that expression of a tumor-associated antigen by exfoliated sputum epithelial cells has greater accuracy sensitivity and specificity for the detection of preclinical, localized lung cancer than do routine clinical detection methods. Monoclonal antibody MAb 703D4 rec…	human	miner	x	cell	4
9303064	[Radon] AND [Cigarette/Tobacco]	Lung cancer	AO	Molecular identification of individuals at high risk for lung cancer.	1997	The objective of the work reviewed herein was to evaluate whether a cancerization field-consisting of cells with genetic alterations can be detected within normal-appearing bronchial epithelium. By using fluorescence in situ hybridization FISH for trisomy 7, cancerization fields were detected in the majority of cancer patients and also in significant percentages of cancer-free tobacco smokers and…	human	miner	x	cell	4
9093345	[Radon] AND [Cigarette/Tobacco]	Increase, lung cancer; Lung tumour; Squamous Cell Carcinoma; Lung cancer	AO	Lung cancer in relation to exposure to silica dust, silicosis and uranium production in South African gold miners.	1997	BACKGROUND A nested case-control study for lung cancer was performed on a cohort of 2260 South African gold miners in whom an association between exposure to silica dust and risk of lung cancer was previously reported. The objective was to investigate an expanded set of risk factors and also cancer cell type. METHODS The 78 cases of lung cancer found during the follow up period from 1970 to 1986 …	human	miner	x	cell	4
8608503	[Radon] AND [Cigarette/Tobacco]	Squamous Cell Carcinoma; Increase, lung cancer; Lung cancer	AO	A comparison between the localization of lung tumors in uranium miners and in nonminers from 1947 to 1991.	1996	BACKGROUND Lung cancer was noted to be increased in cigarette smoking miners and nonminers. Carcinogen particulates deposit differentially in the central, middle, and peripheral zones of the bronchial tree depending on the size of the particle. The object of this study was to evaluate the incidence of tumors their cell types and the relationship of particulate size to their position in the bronch…	human	miner	x	cell	4
8512985	[Radon] AND [Cigarette/Tobacco]	Lung cancer	AO	Radon, cigarette smoke, and lung cancer a re-analysis of the Colorado Plateau uranium miners data.	1993	Much of our knowledge regarding the interaction of radon and tobacco smoke in the etiology of human lung cancer derives from studies of uranium miners. In this article, we present a re-analysis of lung cancer mortality in the Colorado Plateau miners cohort within the framework of the two-mutation clonal expansion model of carcinogenesis. This analysis takes into account the patterns of exposure t…	human	miner	x	cell	4
8395166	[Radon] AND [Cigarette/Tobacco]	Small Cell Lung Carcinoma; Lung cancer	AO	Increased risk for small cell lung cancer following residential exposure to low-dose radon a pilot study.	1993	Alpha track radon detectors were placed in the homes of 35 lung cancer patients and 35 matched controls for a period of 8 to 10 mo. Twenty lung cancer patients had small cell lung carcinoma 11 had adenocarcinoma, 2 had squamous cell carcinoma, and 2 had unclassified carcinoma among 15 nonsmokers. Mean overall living on ground level was significantly higher in the group with small cell lung carcin…	human	x	x	cell	4
8384961	[Radon] AND [Cigarette/Tobacco]	Lung cancer	AO	Pathogenesis and pathology.	1993	Pathogenesis consists of a discussion of the role of oncogenes and suppressor genes on small-cell lung cancer and non-small-cell lung cancer as well as the external factors of smoking active and passive, asbestos, and radon. Pathology consists of discussion of squamous cell lung cancer, adenocarcinoma and bronchoalveolar carcinoma, large cell carcinoma including giant cell and clear cell variants…	x	x	x	cell	4
8184006	[Radon] AND [Cigarette/Tobacco]	Small Cell Lung Carcinoma; Squamous Cell Carcinoma; Lung cancer	AO	Exposure to radon progeny, tobacco use and lung cancer in a case-control study in southern China.	1994	A case-control study of lung cancer in underground tin miners in southern China was conducted to examine the interplay between exposure to radon progeny and tobacco use. A total of 460 incident cases and 1,043 controls were evaluated. Among the exposed, mean radon progeny exposures were 600 and 427 working level months WLM for cases and controls, respectively. The excess relative risk per WLM ERR…	human	miner	x	cell	4
8106244	[Radon] AND [Cigarette/Tobacco]	Small Cell Lung Carcinoma; Increase, lung cancer; Lung cancer	AO	Residential radon exposure and lung cancer evidence of an urban factor in Iowa.	1994	An ecological study of lung cancer, cigarette smoking, and radon exposure was conducted in 20 Iowa counties. County-based lung cancer incidence data for white female residents of Iowa were stratified according to radon level and smoking status. Cancer incidence data for the period 1973-1990 were obtained from the State Health Registry of Iowa. Smoking level was determined from a randomly mailed s…	x	x	x	cell	4
8014004	[Radon] AND [Cigarette/Tobacco]	Lung cancer	AO	Residential radon exposure and lung cancer--an epidemiological study of Norwegian municipalities.	1994	The study is based on a collaboration between the Cancer Registry of Norway, the Norwegian Radiation Protection Authority, and National Radiological Protection Board NRPB, UK. The association between indoor radon exposure and lung cancer was studied in 427 municipalities. NRPB detectors were sent to 10,000 households, and 7,500 of the detectors were returned. Data from a nation-wide survey of smo…	x	x	x	cell	4
7612800	[Radon] AND [Cigarette/Tobacco]	Lung cancer; Lung Diseases	AO	Attributable risk of lung cancer in lifetime nonsmokers and long-term ex-smokers Missouri, United States.	1995	A population-based, case-control study of incident lung cancer among women in Missouri United States who were lifetime nonsmokers and long-term ex-smokers was conducted between 1986 and 1992. The study included 618 lung cancer cases and 1,402 population-based, age matched controls. Information on lung-cancer risk factors was obtained by interviewing cases, next-of-kin of cases 36 percent and 64 p…	human	x	x	cell	4
6572389	[Radon] AND [Cigarette/Tobacco]	Lung cancer	AO	alpha-Radiation dose at bronchial bifurcations of smokers from indoor exposure to radon progeny.	1983	Synergistic interactions of indoor radon progeny with the cigarette smoking process have been evaluated experimentally. Smoking enhances the air concentration of submicron particles and attached radon decay products. Fractionation in burning cigarettes gives rise to the association of radon progeny with large particles in mainstream cigarette smoke, which are selectively deposited in "hot spots" …	x	x	x	cell	4
6297249	[Radon] AND [Cigarette/Tobacco]	Small Cell Lung Carcinoma	AO	Combined effects of mining and smoking in the causation of lung carcinoma. A case-control study in northern Sweden.	1982	Within a case-control study of male lung carcinoma in northern Sweden combined effects of underground mining iron ore mines and smoking were analysed. A synergistic effect was found approximately of multiplicative type. Cases with lung carcinoma exposed to underground mining had a considerably lower average cumulative tobacco consumption than other lung carcinoma cases as an expression of the fac…	human	miner	x	cell	4
6279361	[Radon] AND [Cigarette/Tobacco]	Lung Diseases; Increase, lung cancer; Lung cancer	AO	Lung cancer among Navajo uranium miners.	1982	Lung cancer has been a rare disease among the Indians of the southwestern United States. However, the advent of uranium mining in the area has been associated with an increased incidence of lung cancer among Navajo uranium miners. This study centers on Navajo men with lung cancer who were admitted to the hospital from February 1965 to May 1979. Of a total of 17 patients with lung cancer, 16 were …	human	miner	x	cell	4
3700112	[Radon] AND [Cigarette/Tobacco]	Lung cancer	AO	An epidemiological analysis of the relationship between exposure to Rn progeny, smoking and bronchogenic carcinoma in the U-mining population of the Colorado Plateau--1960-1980.	1986	This study investigates the relationship between exposure to radioactive Rn decay products during U mining and milling operations, cigarette smoking and age, on the incidence and mortality rates of lung cancer among U workers of the Colorado Plateau during the 20-yr period from 1960-1980. A case control sample was taken from an extensive data base of 9,817 men accumulated by one author Saccomanno…	human	x	x	cell	4
36959236	[Radon] AND [Cigarette/Tobacco]	Lung cancer; Small Cell Lung Carcinoma	AO	Occupation as a risk factor of small cell lung cancer.	2023	Small cell lung cancer SCLC comprises approximately 10 of all lung cancer cases. Tobacco is its main risk factor however, occupation might play a role in this specific lung cancer subtype. The effect of occupation on SCLC risk has been hardly studied and therefore we aim to assess the role of occupation on the risk of SCLC. To do this, we designed a multicentric, hospital-based, case-control stud…	x	x	x	cell	4
35409936	[Radon] AND [Cigarette/Tobacco]	Lung cancer; Small Cell Lung Carcinoma	AO	Residential Radon Exposure in Patients with Advanced Lung Cancer in Lublin Region, Poland.	2022	Exposure to radon is the second most common factor causing lung cancer in smokers and the first among non-smokers. We aimed to measure the impact of the radon exposure on patients with different histological types of advanced lung cancer. The measurement of radon exposure was performed in 102 patients with lung cancer in stage 3B or higher Poland. There were 78.4 of patients with non-small cell c…	human	x	x	cell	4
35312555	[Radon] AND [Cigarette/Tobacco]	Small Cell Lung Carcinoma; Increase, lung cancer; Lung cancer	AO	Residential Radon and Small Cell Lung Cancer. Final Results of the Small Cell Study.	2022	INTRODUCTION Residential radon is considered the second cause of lung cancer and the first in never smokers. Nevertheless, there is little information regarding the association between elevated radon levels and small cell lung cancer SCLC. We aimed to assess the effect of residential radon exposure on the risk of SCLC in general population through a multicentric case-control study. METHODS A mult…	human	x	x	cell	4
35215076	[Radon] AND [Cigarette/Tobacco]	Lung cancer	AO	Epstein-Barr Virus Infection in Lung Cancer Insights and Perspectives.	2022	Lung cancer LC is the leading cause of cancer death worldwide. Tobacco smoke is the most frequent risk factor etiologically associated with LC, although exposures to other environmental factors such as arsenic, radon or asbestos are also involved. Additionally, the involvement of some viral infections such as high-risk human papillomaviruses HR-HPVs, Merkel cell polyomavirus MCPyV, Jaagsiekte She…	human	x	animals	cell	4
35045822	[Radon] AND [Cigarette/Tobacco]	Lung cancer; Squamous Cell Carcinoma	AO	Alpha-1 antitrypsin deficiency and risk of lung cancer in never-smokers a multicentre case-control study.	2022	BACKGROUND Lung cancer LC is the most commonly diagnosed cancer and the leading cause of cancer-related death in both sexes worldwide. Although the principal risk factor in the western world is tobacco smoking, genetic factors, including alpha-1 antitrypsin deficiency AATD, have been associated with increased risk. This study is the continuation of an earlier one published by the same group in 20…	human	x	x	cell	4
3416280	[Radon] AND [Cigarette/Tobacco]	Lung cancer	AO	Relationship of radioactive radon daughters and cigarette smoking in the genesis of lung cancer in uranium miners.	1988	This article documents the study of 383 cases of lung cancer in uranium miners and presents for the first time the relationship of radioactive radon gas and cigarette smoking. There is evidence that alpha radiation from radon gas at exposure levels above 465 working level months WLM is a strong contributor to the development of lung cancer. Cigarette smoking plays the most significant role in cau…	human	miner	x	cell	4
33744027	[Radon] AND [Cigarette/Tobacco]	Small Cell Lung Carcinoma; Increase, lung cancer; Lung cancer	AO	Residential Radon and Small Cell Lung Cancer. Final Results of the Small Cell Study.	2021	INTRODUCTION Residential radon is considered the second cause of lung cancer and the first in never smokers. Nevertheless, there is little information regarding the association between elevated radon levels and small cell lung cancer SCLC. We aimed to assess the effect of residential radon exposure on the risk of SCLC in general population through a multicentric case-control study. METHODS A mult…	human	x	x	cell	4
33640828	[Radon] AND [Cigarette/Tobacco]	Lung cancer	AO	Small-cell lung cancer in never-smokers.	2021	BACKGROUND Lung cancer is a public health problem worldwide. Small-cell lung cancer SCLC is the most aggressive histologic type, with a 5-year survival lt10. SCLC is closely associated with tobacco consumption and infrequent in never-smokers. We aim to describe SCLC characteristics in never-smokers recruited in a radon-prone area. PATIENTS AND METHODS We designed a multicentric case series where …	human	x	x	cell	4
33374630	[Radon] AND [Cigarette/Tobacco]	Lung cancer	AO	The "Polonium In Vivo" Study Polonium-210 in Bronchial Lavages of Patients with Suspected Lung Cancer.	2020	Few studies have reported on polonium-210, a decay breakdown product of radon-222 and lead-210, in human lungs and there has been no study in patients with suspected lung cancer. The main aim of this "Polonium in vivo" study was to evaluate polonium-210 radioactivity in bronchopulmonary systems of smoker, ex-smoker and never smoker patients with suspected lung cancer. Alpha-spectrometric analyses…	human	x	animals	x	4
32736146	[Radon] AND [Cigarette/Tobacco]	Lung cancer; Increase, lung cancer	AO	Lung cancer risk and residential radon exposure A pooling of case-control studies in northwestern Spain.	2020	BACKGROUND Through a pooled case-control study design, we have assessed the relationship between residential radon exposure and lung cancer risk. Other objectives of the study were to evaluate the different risk estimates for the non-small cell lung cancer histological types and to assess the effect modification of the radon exposure on lung cancer risk by tobacco consumption. METHODS We collecte…	human	x	x	cell	4
31956359	[Radon] AND [Cigarette/Tobacco]	Lung cancer	AO	Nicotinic-nAChR signaling mediates drug resistance in lung cancer.	2020	Lung cancer is the leading cause of cancer death worldwide. Cigarette smoking is the most common risk factor for lung carcinoma other risks include genetic factors and exposure to radon gas, asbestos, secondhand smoke, and air pollution. Nicotine, the primary addictive constituent of cigarettes, contributes to cancer progression through activation of nicotinic acetylcholine receptors nAChRs, whic…	human	x	animals	x	4
31404471	[Radon] AND [Cigarette/Tobacco]	Lung cancer	AO	Radon as a Tracer of Lung Changes Induced by Smoking.	2020	After smoking, exposure to radon and its progeny is the second leading cause of lung cancer. The probability of inducing lung carcinomas by inhaled radon progeny depends on the deposited radiation dose, and is significantly affected by physiological and morphometric changes induced by smoking. Due to irritation of the airways, the inhalation of cigarette smoke leads to the hyperproduction of mucu…	x	x	x	cell	4
31054745	[Radon] AND [Cigarette/Tobacco]	Squamous Cell Carcinoma; Lung cancer; squamous cell carcinoma lung metastasis	AO	ACR Appropriateness Criteria Noninvasive Clinical Staging of Primary Lung Cancer.	2019	Lung cancer is the leading cause of cancer-related deaths in both men and women. The major risk factor for lung cancer is personal tobacco smoking, particularly for small-cell lung cancer SCLC and squamous cell lung cancers, but other significant risk factors include exposure to secondhand smoke, environmental radon, occupational exposures, and air pollution. Education and socioeconomic status af…	human	x	x	cell	4
31024877	[Radon] AND [Cigarette/Tobacco]	Lung cancer	AO	Impact of the Hydraulic Fracturing on Indoor Radon Concentrations in Ohio A Multilevel Modeling Approach.	2019	According to the United States Environmental Protection Agency U.S. EPA, exposure to radon gas is the second leading cause of lung cancer after smoking. Extant research that has reported that fracking activity increases the radon levels. "Fracking" also known as hydraulic fracturing, which is a technology that is used to extract naturally occurring shale gas from the Marcellus and the Utica shale…	human	x	x	cell	4
3051700	[Radon] AND [Cigarette/Tobacco]	Lung cancer; Increase, lung cancer	AO	Models for the analysis of radon-exposed populations.	1988	Radon-222 is a radioactive decay product of radium-226 and uranium-238, which are found throughout the crust of the earth. Studies of underground miners clearly show that exposure to radon and its decay products increases the risk of developing lung cancer. Data on standardized mortality ratios from eight cohort studies indicate that the radon-lung cancer relationship is statistically homogeneous…	human	miner	x	cell	4
3051699	[Radon] AND [Cigarette/Tobacco]	Lung cancer	AO	Lung cancer risks of underground miners cohort and case-control studies.	1988	All underground mines have higher radon levels than are found in surface air. Ventilation is the primary method of controlling radon levels. Fourteen cohort and seven case-control studies done on underground miners are reviewed they include many types of ore. Only five of the studies deal with more than 100 lung cancer deaths. Variations in the attributable risk are given. Some generalizations ca…	human	miner	x	cell	4
30396064	[Radon] AND [Cigarette/Tobacco]	Lung cancer	AO	Human lung epithelial cells cultured in the presence of radon-emitting rock experience gene expression changes similar to those associated with tobacco smoke exposure.	2019	Radon is the second leading cause of lung cancer, after tobacco smoke. While tobacco smoke-induced carcinogenesis has been studied extensively, far less is known about radon-induced carcinogenesis, particularly in relation to the influence of radon on gene expression. The objectives of the work described herein were to a determine if and how exposure to low dose radon-emitting rock influences cel…	human	x	x	cell	4
27504164	[Radon] AND [Cigarette/Tobacco]	Lung cancer; Increase, lung cancer	AO	Estimation of the residential radon levels and the annual effective dose in dwellings of Shiraz, Iran, in 2015.	2016	INTRODUCTION Radon is the second most important cause of lung cancer after smoking. Thus, the determination of indoor radon concentrations in dwellings and workplaces is an important public health concern. The purpose of this research was to measure the concentration of radon gas in residential homes and public places in the city of Shiraz and its relationship with the type and age of the buildin…	human	x	x	cell	4
27357515	[Radon] AND [Cigarette/Tobacco]	Lung cancer	AO	Human papillomavirus and lung cancinogenesis an overview.	2016	Lung cancer is the most common cause of cancer deaths worldwide. Although tobacco smoking is considered to be the main risk factor and the most well-established risk factor for lung cancer, a number of patients who do not smoke have developed this disease. This number varies between 15 to over one-half of lung cancer cases, and the deaths from lung cancer in non-smokers are increasing every year.…	human	x	x	cell	4
26791782	[Radon] AND [Cigarette/Tobacco]	Lung cancer	AO	p90 ribosomal S6 kinase a potential therapeutic target in lung cancer.	2016	A global survey of cancer has shown that lung cancer is the most common cause of the new cancer cases and cancer deaths in men worldwide. The mortality from lung cancer is more than the combined mortality from breast, prostate and colorectal cancers. The two major histological types of lung cancer are non-small cell lung cancer NSCLC accounting for about 85 of cases and small cell lung cancer acc…	human	x	animals	cell	4
26297204	[Radon] AND [Cigarette/Tobacco]	Lung cancer; Small Cell Lung Carcinoma	AO	Lung cancer Biology and treatment options.	2015	Lung cancer remains the leading cause of cancer mortality in men and women in the U.S. and worldwide. About 90 of lung cancer cases are caused by smoking and the use of tobacco products. However, other factors such as radon gas, asbestos, air pollution exposures, and chronic infections can contribute to lung carcinogenesis. In addition, multiple inherited and acquired mechanisms of susceptibility…	human	x	x	cell	4
25944953	[Radon] AND [Cigarette/Tobacco]	Lung cancer	AO	Analyses of local dose distributions in the lungs for the determination of risk apportionment factors.	2015	For radiation protection purposes, the relative contributions of bronchial BB, bronchiolar bb and alveolar-interstitial AI doses to lung cancer risk are represented by their corresponding apportionment factors. The current assumption of equal apportionment factors can be tested by comparing different radon and thoron progeny exposures, which produce different regional dose distributions, with the…	human	x	animals	x	4
25857246	[Radon] AND [Cigarette/Tobacco]	Lung cancer	AO	Reanalysis of the DEMS nested case-control study of lung cancer and diesel exhaust suitability for quantitative risk assessment.	2015	The International Agency for Research on Cancer IARC in 2012 upgraded its hazard characterization of diesel engine exhaust DEE to "carcinogenic to humans." The Diesel Exhaust in Miners Study DEMS cohort and nested case-control studies of lung cancer mortality in eight U.S. nonmetal mines were influential in IARCs determination. We conducted a reanalysis of the DEMS case-control data to evaluate i…	human	miner	animals	x	4
25458560	[Radon] AND [Cigarette/Tobacco]	Lung cancer	AO	Lung cancer hormesis in high impact states where nuclear testing occurred.	2015	BACKGROUND Hormesis is a favorable biological response to low toxin exposure. In the case of radiation, large doses are carcinogenic, but low doses might be protective. In the current study, we analyzed lung cancer incidence in high-impact radiation states where nuclear testing occurred and compared it with lung cancer incidence in the remaining normal-impact radiation states and the District of …	human	miner	animals	x	4
23910905	[Radon] AND [Cigarette/Tobacco]	Squamous Cell Carcinoma; Lung cancer; squamous cell carcinoma lung metastasis	AO	Spatial and temporal distributions of lung cancer histopathology in the state of Maine.	2013	Maine has among the highest rates of lung cancer in the United States US. Maine serves as a geographical representation of US rural communities, and their associated health disparities. As the key risks of tobacco use decrease and radon abatement increases, previously obscured environmental exposures may measurably contribute to the attributable risk fraction of lung cancer. To generate hypothese…	x	x	x	cell	4
23685138	[Radon] AND [Cigarette/Tobacco]	Lung cancer	AO	Rationale and design of the Japan molecular epidemiology for lung cancer study.	2013	We present the rationale for the Japan Molecular Epidemiology for Lung Cancer study designed to elucidate molecular mechanisms of carcinogenesis in smokers and never-smokers with non-small-cell lung cancer. This prospective, ongoing, multicenter study is being conducted nationwide in Japan. Although there is no doubt that active smoking is the major cause of lung cancer, the contribution of other…	human	x	x	cell	4
2348467	[Radon] AND [Cigarette/Tobacco]	Lung cancer	AO	Indoor radon and lung cancer in China.	1990	Radon has long been known to contribute to risk of lung cancer, especially in undergound miners who are exposed to large amounts of the carcinogen. Recently, however, lower amounts of radon present in living areas have been suggested as an important cause of lung cancer. In an effort to clarify the relationship of low amounts of radon with lung cancer risk, we placed alpha-track radon detectors i…	human	miner	x	cell	4
23173984	[Radon] AND [Cigarette/Tobacco]	Lung cancer	AO	Arsenic, asbestos and radon emerging players in lung tumorigenesis.	2012	The cause of lung cancer is generally attributed to tobacco smoking. However lung cancer in never smokers accounts for 10 to 25 of all lung cancer cases. Arsenic, asbestos and radon are three prominent non-tobacco carcinogens strongly associated with lung cancer. Exposure to these agents can lead to genetic and epigenetic alterations in tumor genomes, impacting genes and pathways involved in lung…	human	miner	animals	x	4
22539606	[Radon] AND [Cigarette/Tobacco]	Small Cell Lung Carcinoma; Increase, lung cancer; Lung cancer	AO	Residential radon exposure, histologic types, and lung cancer risk. A case-control study in Galicia, Spain.	2012	BACKGROUND Lung cancer is an important public health problem, and tobacco is the main risk factor followed by residential radon exposure. Recommended exposure levels have been progressively lowered. Galicia, the study area, has high residential radon concentrations. We aim i to assess the risk of lung cancer linked to airborne residential radon exposure, ii to ascertain whether tobacco modifies r…	x	x	x	cell	4
21175354	[Radon] AND [Cigarette/Tobacco]	Lung cancer	AO	Lung cancer from radon a two-stage model analysis of the WISMUT Cohort, 1955-1998.	2011	A biologically based two-stage carcinogenesis model is applied to epidemiological data for lung cancer mortality in a large uranium miner cohort of the WISMUT company Germany. To date, this is the largest uranium miner cohort analyzed by a mechanistic model, comprising 35,084 workers among whom 461 died from lung cancer in the follow-up period 1955-1998. It comprises only workers who were first e…	human	miner	x	cell	4
19767603	[Radon] AND [Cigarette/Tobacco]	Lung cancer	AO	Lung dosimetry for inhaled radon progeny in smokers.	2010	Cigarette smoking may change the morphological and physiological parameters of the lung. Thus the primary objective of the present study was to investigate to what extent these smoke-induced changes can modify deposition, clearance and resulting doses of inhaled radon progeny relative to healthy non-smokers NSs. Doses to sensitive bronchial target cells were computed for four categories of smoker…	x	x	x	cell	4
19755391	[Radon] AND [Cigarette/Tobacco]	Lung cancer	AO	Lung cancer in never smokers clinical epidemiology and environmental risk factors.	2009	More than 161,000 lung cancer deaths are projected to occur in the United States in 2008. Of these, an estimated 10 to 15 will be caused by factors other than active smoking, corresponding to 16,000 to 24,000 deaths annually. Thus lung cancer in never smokers would rank among the most common causes of cancer mortality in the United States if considered as a separate category. Slightly more than h…	human	miner	animals	x	4
17290066	[Radon] AND [Cigarette/Tobacco]	Lung cancer	AO	Lung cancer in never smokers a review.	2007	Lung cancer is the leading cause of cancer-related death in the United States. Although tobacco smoking accounts for the majority of lung cancer, approximately 10 of patients with lung cancer in the United States are lifelong never smokers. Lung cancer in the never smokers LCINS affects women disproportionately more often than men. Only limited data are available on the etiopathogenesis, molecula…	human	x	x	cell	4
15368331	[Radon] AND [Cigarette/Tobacco]	Asthma	AO	Lung adenocarcinoma and human papillomavirus infection.	2004	Over the past three decades, the incidence of lung adenocarcinoma has increased worldwide. Most individuals with lung adenocarcinoma especially women are nonsmokers. Reported risk factors for the development of lung adenocarcinoma include cigarette smoking exposure to cooking fumes, air pollution, second-hand smoke, asbestos, and radon nutritional status genetic susceptibility immunologic dysfunc…	human	x	x	cell	4
11747553	[Radon] AND [Cigarette/Tobacco]	Lung cancer; Lung tumour	AO	Modelling lung tumour risk in radon-exposed uranium miners using generalizations of the two-mutation model of Moolgavkar, Venzon and Knudson.	2002	PURPOSES To model radon-induced lung cancer in uranium miners using a quasi-biological model of carcinogenesis. MATERIALS AND METHODS Fitting of generalizations of the stochastic two-mutation carcinogenesis model of Moolgavkar, Venzon and Knudson to a case-control dataset nested within the cohort and to the full cohort of lung cancer mortality in the Colorado Plateau uranium miners, taking accoun…	human	miner	x	cell	4
10477911	[Radon] AND [Cigarette/Tobacco]	Lung cancer	AO	Biologically based analysis of the data for the Colorado uranium miners cohort age, dose and dose-rate effects.	1999	This study is a comprehensive analysis of the latest follow-up of the Colorado uranium miners cohort using the two-stage clonal expansion model with particular emphasis on effects related to age and exposure. The model provides a framework in which the hazard function for lung cancer mortality incorporates detailed information on exposure to radon and radon progeny from hard rock and uranium mini…	human	miner	x	cell	4
10384956	[Radon] AND [Cigarette/Tobacco]	Lung cancer	AO	Radon-induced lung cancer in smokers and non-smokers risk implications using a two-mutation carcinogenesis model.	1999	Three sets of data population statistics in non-smokers, data from an investigation of the smoking habits of British doctors and a study of Colorado uranium miners were used to analyse lung cancer in humans as a function of exposure to radon and smoking. One of the aims was to derive implications for radon risk estimates. The data were analysed using a two-mutation radiation carcinogenesis model …	human	miner	x	cell	4
10337715	[Radon] AND [Cigarette/Tobacco]	Lung cancer; Increase, lung cancer	AO	Is there a genetic basis for lung cancer susceptibility?	1999	The major risk factor for lung cancer is exposure to tobacco smoke. Exposure to radon, heavy metals used in smelting, and asbestos also greatly increase risks for lung cancer. However, only about 11 of tobacco smokers ultimately develop lung cancer, suggesting that genetic factors may influence the risk for lung cancer among those who are exposed to carcinogens. Further support for this hypothesi…	human	x	x	cell	4
9067550	[Radon] AND [Cigarette/Tobacco]	Lung cancer; p53	AO + KE	p53 gene mutation analysis in tumors of patients exposed to alpha-particles.	1997	The p53 gene was examined for point mutations in archived, alpha-radiation-associated lung and liver cancers. Lung tumors of 50 uranium miners in Germany were screened by restriction fragment length analysis for the putative hotspot mutation at codon 249 Arg--gtMet previously detected in a significant fraction of miners from the Colorado Plateau, USA. This mutation has been proposed as a marker o…	human	miner	x	x	4
7761575	[Radon] AND [Cigarette/Tobacco]	squamous cell carcinoma lung metastasis; Small Cell Lung Carcinoma; Squamous Cell Carcinoma; Lung cancer; p53	AO + KE	p53 alterations in plutonium-induced F344 rat lung tumors.	1995	The tumor suppressor gene p53 plays a critical role in the cellular response to genetic damage caused by radiation. In addition, mutations in this gene are often encountered in cells in lung tumors resected from uranium miners whose exposure to radon daughters exceeded 450 working level months. However, most of these miners also smoked tobacco products. Thus whether this gene is of specific impor…	human	miner	animals	cell	4
7620945	[Radon] AND [Cigarette/Tobacco]	Lung cancer; Squamous Cell Carcinoma; p53	AO + KE	p53 and ras gene mutations in lung cancer implications for smoking and occupational exposures.	1995	This paper reviews mutational activation of ras oncogenes and inactivation of the p53 tumor suppressor gene in human lung cancer. We discuss the frequency, type, and location of mutations in these genes in relation to known etiological factors for lung cancer. The most studied examples of these are exposure to tobacco smoke, and to radon and asbestos fibers at work. We summarize data from our lab…	human	x	x	cell	4
35377069	[Radon] AND [Cigarette/Tobacco]	Lung cancer; Deposition of Energy	AO + KE	In-vivo dose determination in a human after radon exposure proof of principle.	2022	Radon-222 is pervasive in our environment and the second leading cause of lung cancer induction after smoking while it is simultaneously used to mediate anti-inflammatory effects. During exposure, radon gas distributes inhomogeneously in the body, making a spatially resolved dose quantification necessary to link physical exposure conditions with accompanying risks and beneficial effects. Current …	human	x	animals	x	4
35312585	[Radon] AND [Cigarette/Tobacco]	Lung cancer; OGG1	AO + KE	Radon, Tobacco Exposure and Non-Small Cell Lung Cancer Risk Related to BER and NER Genetic Polymorphisms.	2022	INTRODUCTION Tobacco consumption and radon exposure are considered the first and second most common causes of lung cancer, respectively. The aim of this study was to analyze both whether selected genetic polymorphisms in loci that are in DNA repair pathways, are related to non-small-cell lung cancer NSCLC and whether they may modulate the association between residential radon exposure and lung ca…	human	x	x	cell	4
27188576	[Radon] AND [Cigarette/Tobacco]	Lung cancer; EGFR	AO + KE	Non-small-cell lung cancer.	2015	Lung cancer is one of the most frequently diagnosed cancers and is the leading cause of cancer-related death worldwide. Non-small-cell lung cancer NSCLC, a heterogeneous class of tumours, represents approximately 85 of all new lung cancer diagnoses. Tobacco smoking remains the main risk factor for developing this disease, but radon exposure and air pollution also have a role. Most patients are di…	human	x	x	cell	4
26372664	[Radon] AND [Cigarette/Tobacco]	Oxidative stress; squamous cell carcinoma lung metastasis; Small Cell Lung Carcinoma; IL6; Squamous Cell Carcinoma; Lung cancer; Inflammation	AO + KE	Radon Exposure, IL-6 Promoter Variants, and Lung Squamous Cell Carcinoma in Former Uranium Miners.	2016	BACKGROUND High radon exposure is a risk factor for squamous cell carcinoma, a major lung cancer histology observed in former uranium miners. Radon exposure can cause oxidative stress, leading to pulmonary inflammation. Interleukin-6 IL-6 is a pro-carcinogenic inflammatory cytokine that plays a pivotal role in lung cancer development. OBJECTIVES We assessed whether single nucleotide polymorphisms…	human	miner	animals	cell	4
24711526	[Radon] AND [Cigarette/Tobacco]	Lung cancer; Deposition of Energy; Apoptosis	AO + KE	Use of threshold-specific energy model for the prediction of effects of smoking and radon exposure on the risk of lung cancer.	2014	Lung cancer is the leading cause of cancer death in both men and women. Smoking causes 80-90 of cases of lung cancer. In this study, an attempt was made to assess the impact of cigarette smoking on the risk of lung cancer by the so-called threshold-specific energy model. This model allows to analyse the biological effects of radon daughter products on the lung tissue, and is based on the assumpti…	human	x	x	cell	4
1347094	[Radon] AND [Cigarette/Tobacco]	Lung cancer; Increase, lung cancer; p53	AO + KE	Mutations of p53 and ras genes in radon-associated lung cancer from uranium miners.	1992	Radon increases the risk of lung cancer in smoking and non-smoking underground miners. To investigate the mutational spectrum associated with exposure to high levels of radon, we sequenced exons 5-9 of the p53 tumour suppressor gene and codons 12-13 of the Ki-ras protooncogene in 19 lung cancers from uranium miners exposed to radon and tobacco smoke. Mutations were not found in Ki-ras, but 9 p53 …	human	miner	x	x	4
12941804	[Radon] AND [Cigarette/Tobacco]	Lung cancer; MGMT; Hypermethylation; K-RAS	AO + KE	Promoter hypermethylation of the O6-methylguanine-DNA methyltransferase gene more common in lung adenocarcinomas from never-smokers than smokers and associated with tumor progression.	2003	Adenocarcinoma AC is the most common type of lung cancer diagnosed in the United States, comprising up to 40 of tumors in smokers and 50-80 of tumors in never-smokers. Exposures to cigarette smoke, direct or second-hand, and radiation in the form of radon progeny are the major risk factors for lung AC in both smokers and never-smokers. The goal of the current study was to determine the prevalence…	human	miner	x	x	4
11956078	[Radon] AND [Cigarette/Tobacco]	GSTP1; DNA damage; XRCC1; MGMT; Lung cancer	AO + KE	Glutathione S-transferase P1 and NADPH quinone oxidoreductase polymorphisms are associated with aberrant promoter methylation of P16INK4a and O6-methylguanine-DNA methyltransferase in sputum.	2002	Inactivation of the p16INK4a tumor suppressor gene and O6-methylguanine-DNA methyltransferase MGMT DNA repair gene by aberrant promoter methylation appears to be an important step in respiratory carcinogenesis after exposure to tobacco smoke and radon progeny. The determinants of aberrant promoter methylation are not well characterized. Polymorphic variants of genes of which the products are invo…	human	miner	x	cell	4
11418076	[Radon] AND [Cigarette/Tobacco]	Lung cancer; Increase, Programmed cell death	AO + KE	Analysis of a historical cohort of Chinese tin miners with arsenic, radon, cigarette smoke, and pipe smoke exposures using the biologically based two-stage clonal expansion model.	2001	Hazelton, W. D., Luebeck, E. G., Heidenreich, W. F. and Moolgavkar, S. H. Analysis of a Historical Cohort of Chinese Tin Miners with Arsenic, Radon, Cigarette Smoke, and Pipe Smoke Exposures Using the Biologically Based Two-Stage Clonal Expansion Model. Radiat. Res. 156, 78-94 2001.The two-stage clonal expansion model is used to analyze lung cancer mortality in a cohort of Yunnan tin miners based…	human	miner	x	cell	4
11219768	[Radon] AND [Cigarette/Tobacco]	XRCC1; Increase, lung cancer; Lung cancer	AO + KE	Polymorphisms of the DNA repair gene XRCC1 and lung cancer risk.	2001	We explored the association between polymorphisms of the DNA repair gene XRCC1 codons 194, 280, and 399 and lung cancer risk in a case-control study nested within a cohort of tin miners. Cases were those diagnosed with lung cancer over 6 years of follow-up n = 108. Two controls, matched on age and sex, were selected for each case by incidence density sampling. Of the three polymorphisms, only the…	human	miner	x	x	4
10471051	[Radon] AND [Cigarette/Tobacco]	Increase, lung cancer; Lung tumour; Lung Diseases; Lung cancer; p53	AO + KE	p53 protein, EGF receptor, and anti-p53 antibodies in serum from patients with occupationally derived lung cancer.	1999	The oncogene product epidermal growth factor receptor EGF-R, the tumour suppressor gene product p53 and anti-p53 antibodies are detectable in the serum of certain cancer patients. Increased levels of some of these products were reported in lung cancer patients after occupational asbestos exposure and after exposure to polycyclic aromatic hydrocarbons or vinylchloride. In the first step, this stud…	human	x	x	cell	4
10350439	[Radon] AND [Cigarette/Tobacco]	Lung cancer; p53	AO + KE	p53 Mutations in lung cancer associated with residential radon exposure.	1999	Unusual mutation patterns in lung tumors among underground miners have been indicated, suggesting radon-specific alterations in the genome, but the data are not consistent. To investigate the association between residential radon exposure and p53 mutations in lung tumors, we performed a study on cases from a nation-wide population-based investigation in Sweden. Our study included 83 nonsmoking lu…	human	miner	x	x	4
12055387	[Radon] AND [Cigarette/Tobacco]	Squamous Cell Carcinoma; lungs abnormal; Lung cancer; Apoptosis	AO + KE	The molecular biology of lung cancer.	2002	Lung cancer is the result of molecular changes that occur in the cell, resulting in the deregulation of pathways which control normal cellular growth, differentiation, and apoptosis. Several of these pathways contain well-characterized proto-oncogenes and tumor suppressor genes which are found to be mutated or have abnormal expression patterns in lung cancer. The molecular changes that characteri…	x	x	x	cell	4
18648572	[Radon] AND [Cigarette/Tobacco]	Lung cancer; Apoptosis	AO + KE	Smoking and hormesis as confounding factors in radiation pulmonary carcinogenesis.	2006	Confounding factors in radiation pulmonary carcinogenesis are passive and active cigarette smoke exposures and radiation hormesis. Significantly increased lung cancer risk from ionizing radiation at lung doses lt 1 Gy is not observed in never smokers exposed to ionizing radiations. Residential radon is not a cause of lung cancer in never smokers and may protect against lung cancer in smokers. The…	human	x	x	cell	4
32568451	[Radon] AND [Cigarette/Tobacco]	Lung Diseases; Lung cancer; Apoptosis	AO + KE	The role of endothelial nitric oxide synthase gene polymorphisms in patients with lung cancer.	2020	OBJECTIVES Lung cancer is a disease characterized by uncontrolled cell growth in the lung tissues. The most common causes of lung cancer include smoking, exposure to radon gas, asbestos, environmental pollutants as well as genetic factors. Nitric oxide NO has potential mutagenic and carcinogenic activity and may play an important role in lung cancer. Endothelial NO, synthesized from L-arginine by…	human	x	x	cell	4
31496443	[Radon] AND [Cigarette/Tobacco]	Lung cancer; Apoptosis	AO + KE	Effects of radon on miR-34a-induced apoptosis in human bronchial epithelial BEAS-2B cells.	2019	Radon exposure is known to be the second most frequent cause followed by tobacco exposure for lung cancer development. In lung cancer development, microRNAs miRNAs play an important role in regulating various target genes associated with this disease. It is well-established that apoptosis is involved in the elimination of cancer cells. However, the mechanisms underlying chronic radon exposure ind…	human	x	x	cell	4
8609061	[Radon] AND [Cigarette/Tobacco]	TP53; p53	KE	p16/CDKN2 gene and p53 gene alterations in Japanese non-smoking female lung adenocarcinoma.	1996	Primary lung adenocarcinomas in non-smoking females are increasing in the USA and Japan. Environmental factors such as passive smoking, asbestos, domestic radon, and hormonal effects have been implicated, but the etiology is still uncertain. We therefore analyzed point mutations of p16 gene, a newly characterized tumor suppressor gene, and compared the results with alterations of p53 gene in 28 p…	human	miner	x	x	4
37010341	[Radon] AND [Cigarette/Tobacco]	DNA damage	KE	Radon - occurrence and impact on the health.	2023	Radon is noble, monatomic, radioactive, heavier than the air gas. It is colorless, odorless, tasteless. It exists in natural environment as a result of the decay of radium, and emits mainly alpha radiation and less beta radiation. Residential radon concentrations vary widely by geographic area. The higher concentration of radon is expected globally in the grounds where uranium, radium and thoron …	human	x	x	cell	4
29048996	[Radon] AND [Cigarette/Tobacco]	Increase, Cell Proliferation; Hypermethylation; Hypomethylation; Modification of methylation; Apoptosis	KE	Aberrant DNA methylation in radon and/or cigarette smoke-induced malignant transformation in BEAS-2B human lung cell line.	2017	It is well known that cigarette smoking CS and/or radon Rn induce malignant transformation in lung cells. To investigate the mechanisms underlying lung carcinogenesis induced by CS, Rn or Rn followed by CS using BEAS-2B cell line derived from human bronchial epithelial cells. BEAS-2B cells were exposed to either Rn 20,000 Bq/m3 for 30 min or CS 20 for 10 min or Rn followed by CS for 40 min. Globa…	human	x	x	cell	4
26316936	[Radon] AND [Cigarette/Tobacco]	Oxidative stress; DNA damage; Increases reactive oxygen species; ROS; Lung cancer; Apoptosis	KE	Against Lung Cancer Cells To Be, or Not to Be, That Is the Problem.	2012	Tobacco smoke and radioactive radon gas impose a high risk for lung cancer. The radon-derived ionizing radiation and some components of cigarette smoke induce oxidative stress by generating reactive oxygen species ROS. Respiratory lung cells are subject to the ROS that causes DNA breaks, which subsequently bring about DNA mutagenesis and are intimately linked with carcinogenesis. The damaged cell…	human	miner	animals	cell	4
12925519	[Radon] AND [Cigarette/Tobacco]	Increase, Mutations	KE	Age-time patterns of cancer to be anticipated from exposure to general mutagens.	2003	We explore some stochastic considerations regarding accumulation of mutations in relation to carcinogenesis. In particular, we consider the effect of exposure to specific agents, especially ionizing radiation, that may increase mutation rates. The formulation and consequences are a further development of the Armitage-Doll model both in terms of background cancer where assumptions are substantiall…	human	miner	x	x	4
12918790	[Radon] AND [Cigarette/Tobacco]	Deposition of Energy	KE	Use of various microdosimetric models for the prediction of radon induced damage in human lungs.	2003	Exposure to radon and radon decay products in some residential areas and at workplaces constitutes one of the greatest risks from natural sources of ionising radiation. Recently, increasing attention has been paid to the precise estimations of this health risk by numerous models. The compartmental model published in ICRP Publication 66 HRTM has been used for calculating alpha activity concentrati…	human	miner	x	cell	4
