# Supplementary material for: Comprehensive computational analysis via Adverse Outcome Pathways and Aggregate Exposure Pathways in exploring synergistic effects from radon and tobacco smoke on lung cancer
Source: Frontiers journal article supplement (doi:10.3389/fpubh.2025.1571290), 2025-07-31
Supplement: Table_1.xlsx [file Table_1.xlsx]

## Sheet: Lung_cancer_events
Event (AOP-helpFinder input)	Source (Database)
Dark patches on lungs	StoreDB
Dark spots on lung	StoreDB
Lower respiratory system	StoreDB
Lung lesion	StoreDB
Lung malignant sarcoma	StoreDB
Lung masses	StoreDB
Lung metastasis	StoreDB
Lung tumour	StoreDB
lungs abnormal	StoreDB
Lungs inflammation	StoreDB
lungs lymphoblastic leukemia	StoreDB
lungs speckled	StoreDB
Mass salivary gland lung tumours	StoreDB
metastatic lung tumour	StoreDB
Metastatising to lung	StoreDB
nodules in lung	StoreDB
Nodules on lung	StoreDB
pale lungs pleural effusion	StoreDB
squamous cell carcinoma lung metastasis	StoreDB
squamous change	StoreDB
White nodules on lung	StoreDB
ADIPOQ	GeneCards
AMACR	GeneCards
ATM	GeneCards
B2M	GeneCards
BRCA1	GeneCards
BRCA2	GeneCards
CALCA	GeneCards
CHRNB4	GeneCards
CLU	GeneCards
CR1	GeneCards
CR2	GeneCards
CYP1A1	GeneCards
CYP2E1	GeneCards
DDB1	GeneCards
EPHX1	GeneCards
ERCC2	GeneCards
FCER2	GeneCards
FLOT2	GeneCards
G6PD	GeneCards
GSTM2	GeneCards
GSTP1	GeneCards
GSTT1	GeneCards
H2AX	GeneCards
HPRT1	GeneCards
INTS3	GeneCards
KRT5	GeneCards
LEPQTL1	GeneCards
MGMT	GeneCards
MMP1	GeneCards
MPO	GeneCards
NOTCH1	GeneCards
NQO1	GeneCards
OGG1	GeneCards
PHB1	GeneCards
POGLUT1	GeneCards
PRL	GeneCards
RAD51	GeneCards
RASSF1	GeneCards
REG1A	GeneCards
SERPINC1	GeneCards
SIRT1	GeneCards
SOD1	GeneCards
TFF1	GeneCards
TKT	GeneCards
TNF	GeneCards
TP53BP1	GeneCards
TRIM28	GeneCards
XRCC1	GeneCards
XRCC3	GeneCards
ADCY1	DisGeNET
AKT1	DisGeNET
ASCL1	DisGeNET
AVP	DisGeNET
BCLAF1	DisGeNET
BIRC5	DisGeNET
CDYL	DisGeNET
CKB	DisGeNET
CNTNAP2	DisGeNET
COL22A1	DisGeNET
COL4A2	DisGeNET
CREBBP	DisGeNET
CSF3	DisGeNET
CYP2A6	DisGeNET
DIP2C	DisGeNET
DMPK	DisGeNET
ELAVL2	DisGeNET
EP300	DisGeNET
EPHA7	DisGeNET
EPHB3	DisGeNET
FER	DisGeNET
FGFR1	DisGeNET
GRIK3	DisGeNET
GRM8	DisGeNET
ID2	DisGeNET
INSM1	DisGeNET
KHSRP	DisGeNET
KIF21A	DisGeNET
KIT	DisGeNET
KMT2A	DisGeNET
LYRM9	DisGeNET
MYCL	DisGeNET
MYO18B	DisGeNET
NDRG1	DisGeNET
NPPA	DisGeNET
PAK6	DisGeNET
PLSCR4	DisGeNET
POMK	DisGeNET
PTEN	DisGeNET
PYCARD	DisGeNET
RASSF8	DisGeNET
RB1	DisGeNET
RIMS2	DisGeNET
RUNX1T1	DisGeNET
SATB2	DisGeNET
SLIT2	DisGeNET
SMARCA4	DisGeNET
SOX2	DisGeNET
STK31	DisGeNET
TAF1L	DisGeNET
TAOK3	DisGeNET
TMEM132D	DisGeNET
TP73	DisGeNET
TTBK2	DisGeNET
TTN	DisGeNET
UGT1A1	DisGeNET
ZDBF2	DisGeNET
ACTA2	CTD
Adenocarcinoma, Bronchiolo-Alveolar	CTD
AKR	CTD
AKR1C3	CTD
AR	CTD
Asthma	CTD
BMP4	CTD
Bronchial Hyperreactivity	CTD
Bronchitis, Chronic	CTD
Bronchopulmonary Dysplasia	CTD
Carcinoma, Non-Small-Cell Lung	CTD
CCDN2	CTD
CDH1	CTD
CDH3	CTD
COL2A1	CTD
CTNNB1	CTD
EDIL3	CTD
EPN3	CTD
FAT2	CTD
FAT4	CTD
FN1	CTD
IL1A	CTD
ITGB4	CTD
JAG2	CTD
KCNJ2	CTD
KRAS	CTD
KRT17	CTD
KRT19	CTD
KRT23	CTD
KRT6A	CTD
LAD1	CTD
LAMA3	CTD
LAMB3	CTD
LAMC2	CTD
Lung Diseases	CTD
Lung Injury	CTD
Lung Neoplasms	CTD
MIR1246	CTD
MIR494	CTD
MIR638	CTD
NFE2L2	CTD
NID2	CTD
NR2F1	CTD
OLFML2A	CTD
PERP	CTD
PLCH2	CTD
Pneumonia	CTD
PTGS2	CTD
Pulmonary Disease, Chronic Obstructive	CTD
Pulmonary Emphysema	CTD
Pulmonary Fibrosis	CTD
Respiratory Hypersensitivity	CTD
Respiratory Sounds	CTD
Respiratory Tract Diseases	CTD
RGS4	CTD
ROS	CTD
S100A14	CTD
S100A2	CTD
SERINC2	CTD
SERPINB5	CTD
Small Cell Lung Carcinoma	CTD
SPINT2	CTD
Squamous Cell Carcinoma	CTD
ST14	CTD
TMEM40	CTD
TP63	CTD
Abnormal methylation	AOP-Wiki (related)
Hypermethylation	AOP-Wiki (related)
Hypomethylation	AOP-Wiki (related)
Methylation changes	AOP-Wiki (related)
Modification of methylation	AOP-Wiki (related)
Activation of Tumor Protein 53	AOP-Wiki
Airway Surface Liquid Height, Decreased	AOP-Wiki
Apoptosis	AOP-Wiki
Carcinoma, Squamous Cell	AOP-Wiki
Cilia Beat, Decreased	AOP-Wiki
Decrease, ATP production	AOP-Wiki
Decreased, Lung function	AOP-Wiki
Deposition of Energy	AOP-Wiki
Deposition of Ionizing Energy	AOP-Wiki
DNA damage	AOP-Wiki
Epigenetic modification	AOP-Wiki
Esophageal Squamous Cell Carcinoma	AOP-Wiki
FOXJ1, Decreased	AOP-Wiki
Inadequate DNA repair	AOP-Wiki
Increase, Cell Proliferation	AOP-Wiki
Increase, Chromosomal aberrations	AOP-Wiki
Increase, DNA damage	AOP-Wiki
Increase, DNA strand breaks	AOP-Wiki
Increase, lung cancer	AOP-Wiki
Increase, Mutations	AOP-Wiki
Increase, Oxidative damage to DNA	AOP-Wiki
Increase, Oxidative stress	AOP-Wiki
Increase, Pro-inflammatory mediators	AOP-Wiki
Increase, Programmed cell death	AOP-Wiki
Increases reactive oxygen species	AOP-Wiki
Inflammation	AOP-Wiki
Lung cancer	AOP-Wiki
Motile Cilia, Decreased	AOP-Wiki
Mucociliary Clearence, Decreased	AOP-Wiki
Oxidative stress	AOP-Wiki
EGFR	DisGeNET, GeneCards
TP53	DisGeNET, GeneCards
Lung abscess	CTD, StoreDB
CDKN2A	CTD, GeneCards
GSTM1	CTD, GeneCards
HIF1A	CTD, GeneCards
IL6	CTD, GeneCards
MTOR	CTD, DisGeNET
p53	(TP53 synonym)
K-RAS	(KRAS synonym)
